# Supplementary material for: The spatial landscape of progression and immunoediting in primary melanoma at single cell resolution
Source: bioRxiv preprint, doi:10.1101/2021.05.23.445310, version 2 (2022-02-14)
Supplement: Table S6 [file 445310_file07.xlsx]

## Sheet: gene_symbols
Supplementary Table 6. Gene and protein symbols and names and the differentially expressed genes between MIS and EM-IM or between EM and IM regions.
Protein Symbol	Gene ID	Name	Function
PD1	PDCD1	programmed cell death 1	Activated or exhausted T and NK cells
CTLA4	CTLA4	cytotoxic T-lymphocyte associated protein 4	costimulatory molecule expressed on activated T cells
BRAF	BRAF	B-Raf proto-oncogene, serine/threonine kinase	mutated form associated with melanoma progression
NRAS	NRAS	NRAS proto-oncogene, GTPase	Tumor suppressor. Mutation associated with melanoma progression.
PTEN	PTEN	phosphatase and tensin homolog	Tumor suppressor. Mutation associated with melanoma progression.
TP53	TP53	tumor protein p53	Tumor suppressor. Mutation associated with melanoma progression.
PDL1	CD274	programmed cell death 1 ligand 1	Immune checkpoint: inhibitory B7 protien on immune suppressive cells. Ligand of PD1
NF1	NF1	neurofibromin 1	Tumor suppressor. Negative regulator of Ras. Mutation associated with melanoma progression.
CD163	CD163	na	Lineage: Classical macrophage marker
CD3D	CD3D	na	Lineage: T cell marker
TIM3	HAVCR2	hepatitis A virus cellular receptor 2	T-cell exhaustion marker
LAG3	LAG3	lymphocyte activating 3	T-cell exhaustion marker
MLANA	MLANA	melan-A	Lineage: melanocytes and melanoma.
CSPG4	CSPG4	chondroitin sulfate proteoglycan 4	Extracellular matrix protein associated melanoma progression. Useful to subtype melanomas.
SERPINE2	SERPINE2	serpin family E member 2	implicated in metastasis or invasion
CTSL	CTSL	cathepsin L	implicated in metastasis or invasion
NRP2	NRP2	neuropilin 2	implicated in metastasis or invasion
SCD	SCD	stearoyl-CoA desaturase	involved in MITF-dependent proliferation
ETV4	ETV4	ETS variant transcription factor 5	ETS transcription factor, expressed in multiple cancers
BRI3	BRI3	brain protein I3	involved in S100B module
CDK2	CDK2	cyclin dependent kinase 2	involved in MITF-dependent proliferation
MT-ND2	MT-ND2	mitochondrially encoded NADH:ubiquinone oxidoreductase core subunit 2	involved in S100B module
PMEL	PMEL	premelanosome protein	Lineage: melanocytes and melanoma. Involved in S100B module
TBC1D7	TBC1D7	TBC1 domain family member 7	implicated in metastasis or invasion in diverse cancers
TSPAN10	TSPAN10	tetraspanin 10	involved in S100B module
TYR	TYR	Tyrosinase	Lineage: melanocytes and melanoma. Involved in S100B module
KRAS	KRAS	KRAS proto-oncogene, GTPase	proto-oncogene
NF-κB	RELA	REL proto-oncogene, NF-kB p65 subunit	downstream target of KRAS
MYC	MYC	MYC proto-oncogene, bHLH transcription factor	downstream target of KRAS
IGF-1R	IGF1R	insulin like growth factor 1 receptor	insulin like growth factor receptor
IGFBP2	IGFBP2	insulin like growth factor binding protein 2	insulin-like growth factor binding protein
BCL2A1	BCL2A1	BCL2 related protein A1	antiapoptotic pro-survivalmember of the BCL2 gene family
S100A4	S100A4	S100 calcium binding protein A4	implicated in an epithelial to mesenchymal transition
VIM	VIM	vimentin	Mesenchymal marker
CTNNB1	CTNNB1	catenin beta 1	implicated in an epithelial to mesenchymal transition
DMKN	DMKN	Dermokine	implicated in an epithelial to mesenchymal transition
MMP2	MMP2	matrix metallopeptidase 2	implicated in an epithelial to mesenchymal transition
DDX58	DDX58	DExD/H-box helicase 58	RNA sensing protein implicated in suppression of cancer migration
RB	RB1	RB transcriptional corepressor 1	S phase of cell cycle; proliferation marker
KI67	MKI67	marker of proliferation Ki-67	Proliferation marker
PCNA	PCNA	proliferating cell nuclear antigen	DNA replication marker; proliferation
MCM2	MCM2	minichromosome maintenance complex component 2	DNA replication marker; proliferation
p21	CDKN1A	p21/Cip1/Waf1	p21 family of CDK inhibitors
p27	CDKN1B	p27/Kip1	p21 family of CDK inhibitors
p57	CDKN1C	na	p21 family of CDK inhibitors
S100B	S100B	S100 calcium binding protein B	melanoma progression marker
S100A	multiple genes	family of EF hand calcium binding proteins	melanoma progression marker
CCND1	CCND1	Cyclin D1	Labels cells in late G1 of cell cycle
HLA-DPB1	HLA-DPB1	major histocompatibility complex, class II, DP beta 1	antigen expressing cells
CXCL10	CXCL10	C-X-C motif chemokine ligand 10	regulates immune cell migration, differentiation, and activation
CXCL11	CXCL11	C-X-C motif chemokine ligand 11	regulates immune cell migration, differentiation, and activation
IDO1	IDO1	indoleamine 2,3-dioxygenase 1	metabolic enzyme that inhibits cytotoxic T lymphocyte activity and promotes recruitment of myeloid-derived suppressor cells
MX1	MX1	MX dynamin like GTPase 1	interferon stimulated gene indicating interferon pathway activation
IFNɣ	IFNG	Interferon gamma	cytokine that triggers an immune response
CD8	CD8A	CD8A	Lineage: cytotoxic T-cell marker, also expressed on some Natural Killer cells
MIF	MIF	macrophage migration inhibitory factor	Inflammatory cytokine overexpressed in some cancers
CXCR4	CXCR4	C-X-C motif chemokine receptor 4	MIF and CXCL12 receptor. Predicts poor prognosis in melanoma.
CXCL12	CXCL12	C-X-C motif chemokine ligand 12	CXCR4 ligand
CD63	CD63	CD63 molecule, previously named melanoma 1 antigen	marker of immune cell activation
MITF	MITF	melanocyte inducing transcription factor	Lineage: melanocytes and melanoma
SOX10	SOX10	SRY-box transcription factor 10	Lineage: melanocytes and melanoma
CD11c	ITGAX	integrin subunit alpha X	often expressed on dendritic cells.
CD4	CD4	CD4 molecule	Lineage: helper T-cell marker, also expressed on some macrophages
FOXP3	FOXP3	forkhead box P3	lineage marker of regulatory T cells
TIGIT	TIGIT	T cell immunoreceptor with Ig and ITIM domains	T cell exhaustion marker
CD31	PECAM1	CD31 is alias symbol. platelet and endothelial cell adhesion molecule 1	Lineage marker: endothelial cells in blood vessels
STAT1	STAT1	signal transducer and activator of transcription 1	Transcription factor associated with inflammation; interferon signaling
HHLA2	HHLA2	HERV-H LTR-associating 2	Immune checkpoint: inhibitory B7 protien on immune suppressive cells.
CMA1	CMA1	chymase 1	Mast cell activation marker
CD1A	CD1A	na	Highly expressed in Langerhans cells.
PARP	PARP1	poly(ADP-ribose) polymerase 1	Nuclear protein associated DNA repair. Proteolytic cleavage associated with apoptosis.
SNAIL	SNAI1	snail family transcriptional repressor 1	transcriptional repressor
aSMA	ACTA2	Smooth muscle alpha-actin	marker of fibroblasts and smooth muscle around blood vessels
IFI16	IFI16	interferon gamma inducible protein 16	interferon stimulated gene
panCK	multiple genes	cytokeratin	Lineage marker: epithelial cells, specifically epidermal skin cells in this study. Can be expressed in advanced melanomas.
CCNA2	CCNA2	cyclin a2	S phase of cell cycle

## Sheet: DEG_MIS_vs_EM-IM
Differential Expression Analysis between MIS and EM-IM
	baseMean	log2FoldChange	lfcSE	stat	pvalue	padj	Part of S100B module
KLF4	13.9284	51.9445	1.16276	44.6733	0	0	NO
LYPD3	14.941	50.6053	1.11459	45.4025	0	0	NO
KRT6A	79.7111	48.5193	0.889872	54.5239	0	0	NO
GJB2	11.848	41.6898	1.09991	37.9028	0	0	NO
S100A2	37.5984	40.7477	0.897483	45.4022	0	0	NO
KRTDAP	21.3957	38.3405	0.930551	41.202	0	0	NO
SFN	48.9909	36.6518	0.741182	49.4504	0	0	NO
AQP3	62.5434	29.5804	0.810838	36.4813	2.19e-291	2.19e-288	NO
S100A7	21.794	34.6938	0.986174	35.1802	4.01e-271	3.57e-268	NO
KRT6B	65.4392	33.3236	1.01512	32.8272	2.41e-236	1.93e-233	NO
KRT16	27.8399	33.6359	1.12113	30.0018	9.31e-198	6.77e-195	NO
SPRR1B	17.0566	26.8377	1.04488	25.6849	1.73e-145	1.15e-142	NO
KRT6C	17.265	34.9534	1.36253	25.6533	3.88e-145	2.39e-142	NO
KRT17	39.3344	27.2333	1.09213	24.936	3.03e-137	1.73e-134	NO
ID1	16.58	25.6542	1.02918	24.9267	3.82e-137	2.04e-134	NO
FGFR3	11.6463	30.6758	1.29489	23.6899	4.58e-124	2.29e-121	NO
CALML3	13.6586	30.6619	1.30141	23.5606	9.77e-123	4.6e-120	NO
PARN	7.93486	-25.6147	1.14646	-22.3425	1.43e-110	6.35e-108	NO
KRT5	509.434	16.0335	0.733089	21.8711	4.89e-106	2.06e-103	NO
KLF5	10.868	25.6229	1.18877	21.5542	4.84e-103	1.94e-100	NO
FAM167B	3.45219	-23.6641	1.10066	-21.4998	1.56e-102	5.96e-100	NO
TP63	13.3026	26.3553	1.22816	21.4592	3.75e-102	1.36e-99	NO
CRABP2	10.6971	25.5331	1.19636	21.3424	4.59e-101	1.6e-98	NO
HHATL	9.45568	-33.3404	1.56469	-21.308	9.56e-101	3.19e-98	NO
PET117	4.13171	-42.799	2.11839	-20.2035	9.11e-91	2.92e-88	NO
SFRP2	18.4345	27.0447	1.44717	18.688	6.2e-78	1.91e-75	NO
KRT14	232.769	12.5824	0.718076	17.5224	9.67e-69	2.87e-66	NO
DIO2	16.593	25.1898	1.44072	17.4842	1.89e-68	5.4e-66	NO
CA8	5.69263	-26.7514	1.53412	-17.4377	4.27e-68	1.18e-65	NO
COL15A1	13.983	27.1831	1.56844	17.3313	2.73e-67	7.29e-65	NO
NTNG1	4.73273	-30.1496	1.80407	-16.712	1.07e-62	2.77e-60	NO
TPST1	5.02843	-25.8092	1.55602	-16.5867	8.7e-62	2.18e-59	NO
COL5A1	12.7804	24.3491	1.55185	15.6904	1.76e-55	4.27e-53	NO
S100A8	65.6156	11.9625	0.780825	15.3204	5.59e-53	1.32e-50	NO
MPEG1	4.84859	20.265	1.38316	14.6513	1.32e-48	3.02e-46	NO
EBF1	3.53552	26.9734	1.86846	14.4362	3.06e-47	6.81e-45	NO
DEPP1	7.3693	-21.8269	1.51826	-14.3762	7.3e-47	1.58e-44	NO
CXCL1	1.63081	43.0967	3.00372	14.3478	1.1e-46	2.32e-44	NO
LUM	23.9813	20.8141	1.47653	14.0966	3.99e-45	8.18e-43	NO
COL17A1	34.313	12.4488	0.901962	13.8019	2.48e-43	4.96e-41	NO
CCL4	7.69184	-24.3465	1.77489	-13.7172	8.01e-43	1.56e-40	NO
CRIP1	8.31826	19.9343	1.46921	13.5681	6.19e-42	1.18e-39	NO
COL1A2	122.165	10.7215	0.796753	13.4565	2.82e-41	5.25e-39	NO
COL12A1	10.0513	22.1739	1.65048	13.4348	3.78e-41	6.88e-39	NO
DSP	33.3083	10.9369	0.880217	12.4253	1.91e-35	3.39e-33	NO
ANKRD22	2.78871	21.0566	1.70839	12.3254	6.61e-35	1.15e-32	NO
MT-ND4	1587.91	-2.59094	0.2104	-12.3144	7.58e-35	1.29e-32	NO
CXCL14	53.534	8.69492	0.720555	12.067	1.58e-33	2.63e-31	NO
MT-ND2	1280.29	-2.65836	0.233771	-11.3716	5.79e-30	9.46e-28	YES
GPRC5B	12.0166	-11.7642	1.03812	-11.3322	9.09e-30	1.46e-27	NO
CLN8	193.357	-7.34623	0.657256	-11.1771	5.28e-29	8.28e-27	YES
MT-ATP6	1090.58	-2.74378	0.2511	-10.927	8.56e-28	1.32e-25	NO
MRPL44	44.0254	-6.47841	0.601803	-10.765	5.04e-27	7.61e-25	YES
GIMAP6	4.14809	19.5727	1.84682	10.598	3.04e-26	4.48e-24	NO
S100A9	51.4087	7.88383	0.743967	10.597	3.08e-26	4.48e-24	NO
PCSK2	24.2849	9.67628	0.915461	10.5698	4.11e-26	5.88e-24	NO
SPARCL1	2.67082	19.2935	1.83226	10.5299	6.29e-26	8.83e-24	NO
SOX18	3.85113	28.6091	2.73566	10.4578	1.35e-25	1.86e-23	NO
MS4A1	4.60353	22.8841	2.19223	10.4387	1.65e-25	2.24e-23	NO
HHLA1	135.285	-6.05013	0.613623	-9.85968	6.22e-23	8.3e-21	YES
MT-CYB	905.369	-2.54526	0.258214	-9.85718	6.38e-23	8.37e-21	NO
DCN	80.9504	8.45255	0.859365	9.83581	7.89e-23	1.02e-20	NO
CCN3	26.1618	10.2488	1.04816	9.77791	1.4e-22	1.78e-20	NO
MMP2	46.3174	-6.65483	0.680896	-9.77365	1.46e-22	1.83e-20	NO
MNDA	3.62072	20.0196	2.05267	9.75297	1.79e-22	2.21e-20	NO
CCNB1	1.39576	-29.2192	3.00329	-9.72909	2.27e-22	2.75e-20	NO
BHLHE41	37.4039	-7.30986	0.756708	-9.66007	4.46e-22	5.32e-20	YES
MT-CO3	1140.7	-2.35638	0.246394	-9.5635	1.14e-21	1.34e-19	NO
PRF1	5.06487	-18.4556	1.95174	-9.45598	3.2e-21	3.71e-19	NO
JUP	26.0038	7.49344	0.799621	9.37123	7.17e-21	8.2e-19	NO
B2M	1522.34	-3.10423	0.333388	-9.31116	1.26e-20	1.43e-18	NO
JUNB	40.6945	6.75232	0.729334	9.2582	2.08e-20	2.31e-18	NO
COL7A1	24.3576	12.0172	1.30752	9.19081	3.9e-20	4.27e-18	NO
RAB17	32.2916	-6.63901	0.731999	-9.0697	1.19e-19	1.29e-17	YES
MT-ND3	406.595	-2.61661	0.289242	-9.04645	1.48e-19	1.58e-17	NO
KRT15	158.553	7.97975	0.887065	8.99568	2.35e-19	2.47e-17	NO
CD8B	3.36467	17.9688	2.0002	8.98351	2.62e-19	2.73e-17	NO
ST3GAL6	46.3018	-6.55523	0.737711	-8.8859	6.34e-19	6.51e-17	YES
FTH1	693.292	-2.4715	0.28134	-8.78474	1.57e-18	1.59e-16	NO
SERPINE2	229.771	-5.60855	0.662567	-8.46488	2.56e-17	2.57e-15	YES
MT-CO2	522.451	-2.21733	0.266696	-8.31408	9.25e-17	9.14e-15	NO
FNDC1	2.61619	23.9777	2.8883	8.30167	1.03e-16	1e-14	NO
LY6D	19.2626	8.10446	0.977126	8.29418	1.09e-16	1.05e-14	NO
KRT1	157.921	6.76852	0.820998	8.24425	1.66e-16	1.58e-14	NO
CD63	115.824	-3.96354	0.480857	-8.24265	1.68e-16	1.59e-14	YES
APOD	56.4465	-5.96407	0.727598	-8.19693	2.47e-16	2.3e-14	YES
PKP1	17.7863	7.90162	0.965352	8.18522	2.72e-16	2.5e-14	NO
MT-ND6	259.16	-2.70729	0.330815	-8.18369	2.75e-16	2.5e-14	NO
LONP2	58.0116	-5.83425	0.719262	-8.11144	5e-16	4.5e-14	YES
VIM	416.184	-3.08819	0.384036	-8.04142	8.88e-16	7.9e-14	NO
TYR	137.106	-4.65538	0.587441	-7.92484	2.28e-15	2.01e-13	YES
SFRP1	68.0567	-5.68324	0.724202	-7.84759	4.24e-15	3.69e-13	YES
PTGDS	21.0563	7.56171	0.991249	7.62847	2.38e-14	2.04e-12	NO
NPAS2	23.8771	-9.47929	1.25016	-7.58244	3.39e-14	2.89e-12	NO
SNX10	16.1276	-7.12967	0.949476	-7.50906	5.96e-14	5.02e-12	NO
LYPLAL1	17.905	-7.7127	1.02869	-7.49756	6.5e-14	5.42e-12	NO
PMEL	614.616	-3.30551	0.445421	-7.4211	1.16e-13	9.58e-12	YES
MT-ND1	704.875	-2.59767	0.35188	-7.38226	1.56e-13	1.27e-11	NO
BEST1	79.277	-2.65611	0.364592	-7.28515	3.21e-13	2.6e-11	NO
TRIM29	9.83022	7.02558	0.966038	7.27258	3.53e-13	2.82e-11	NO
APCDD1	13.9755	6.34645	0.876812	7.2381	4.55e-13	3.61e-11	NO
SPRY4	10.2035	-7.61856	1.06409	-7.15972	8.08e-13	6.34e-11	NO
LGALS7	8.04332	6.73759	0.942133	7.15142	8.59e-13	6.67e-11	NO
TSPAN10	23.5683	-4.15216	0.587869	-7.06308	1.63e-12	1.25e-10	YES
RHOBTB3	113.661	-5.27606	0.762255	-6.92165	4.46e-12	3.4e-10	YES
KRT10	409.895	4.4809	0.649832	6.89547	5.37e-12	4.02e-10	NO
NDUFA3	10.7943	-5.32857	0.772625	-6.8967	5.32e-12	4.02e-10	NO
BCL10	2.13668	18.958	2.77864	6.82275	8.93e-12	6.62e-10	NO
SLC44A3-AS1	34.1232	-4.41282	0.648357	-6.80616	1e-11	7.36e-10	YES
IFITM2	91.1333	-3.2527	0.478483	-6.79795	1.06e-11	7.72e-10	NO
GNG11	47.0789	-6.20444	0.920036	-6.74369	1.54e-11	1.11e-09	NO
APOC1	11.5479	-6.11786	0.907438	-6.7419	1.56e-11	1.12e-09	NO
SPINT2	20.5653	4.64279	0.68942	6.73435	1.65e-11	1.17e-09	NO
GDF15	7.51354	-5.21182	0.779353	-6.68737	2.27e-11	1.6e-09	NO
PERP	94.8121	5.03743	0.755294	6.66949	2.57e-11	1.79e-09	NO
DSC3	22.2892	5.00757	0.755532	6.62788	3.41e-11	2.35e-09	NO
SNX2	47.9465	-6.96798	1.05394	-6.61138	3.81e-11	2.6e-09	NO
ARPC1B	48.4514	-3.32185	0.506473	-6.55878	5.42e-11	3.68e-09	NO
TACSTD2	10.516	7.1192	1.09306	6.51307	7.36e-11	4.95e-09	NO
ABHD12B	109.674	-5.38346	0.829842	-6.48733	8.74e-11	5.83e-09	YES
S100A14	5.69704	6.3844	0.988551	6.45834	1.06e-10	6.94e-09	NO
CTSK	268.16	-3.04372	0.471199	-6.45953	1.05e-10	6.94e-09	NO
COL6A2	21.0868	6.84138	1.06024	6.45266	1.1e-10	7.15e-09	NO
DUSP1	34.7905	4.70448	0.731896	6.4278	1.29e-10	8.36e-09	NO
MT-CO1	599.143	-2.02218	0.314744	-6.42484	1.32e-10	8.45e-09	NO
RCN2	50.4797	-3.45823	0.540203	-6.40173	1.54e-10	9.76e-09	NO
CSPG4	18.8876	-4.9139	0.768188	-6.39674	1.59e-10	1e-08	NO
FTL	160.543	-2.47421	0.387005	-6.39324	1.62e-10	1.02e-08	NO
NTRK2	14.1013	7.70535	1.20821	6.37749	1.8e-10	1.11e-08	NO
COL16A1	46.8043	-4.57884	0.717908	-6.37803	1.79e-10	1.11e-08	YES
SAV1	11.1918	-8.4238	1.32259	-6.36918	1.9e-10	1.16e-08	NO
NOTCH3	8.88288	6.77217	1.06455	6.36152	2e-10	1.21e-08	NO
HOPX	10.2742	6.77143	1.06539	6.35583	2.07e-10	1.25e-08	NO
QPCT	80.3653	-3.53013	0.561044	-6.29208	3.13e-10	1.87e-08	NO
DSG1	25.0017	6.81407	1.08371	6.28775	3.22e-10	1.91e-08	NO
MTRNR2L12	145.354	-2.23642	0.35808	-6.24558	4.22e-10	2.48e-08	NO
CCDC88A	41.0556	-4.79652	0.773734	-6.19918	5.68e-10	3.32e-08	NO
SLC15A3	15.5071	-5.91566	0.955291	-6.19252	5.92e-10	3.43e-08	NO
SDC1	10.2702	6.84991	1.11135	6.16357	7.11e-10	4.1e-08	NO
CD59	106.127	-4.13683	0.671298	-6.16243	7.16e-10	4.1e-08	NO
IGF2R	33.4457	-5.55616	0.902874	-6.15387	7.56e-10	4.29e-08	NO
GLRX	31.5255	-6.48877	1.05657	-6.14133	8.18e-10	4.61e-08	NO
SOWAHC	5.15108	6.06979	0.992811	6.11374	9.73e-10	5.45e-08	NO
COL3A1	92.35	5.77322	0.944706	6.11113	9.89e-10	5.5e-08	NO
EGR1	14.4241	6.39667	1.05551	6.06026	1.36e-09	7.5e-08	NO
PRSS23	66.1521	-4.13993	0.68623	-6.03286	1.61e-09	8.83e-08	NO
SCD	59.7713	-3.83343	0.636499	-6.02268	1.72e-09	9.34e-08	YES
FAM111A	6.59928	-5.42405	0.904936	-5.99385	2.05e-09	1.11e-07	NO
FRZB	8.16887	6.86511	1.14673	5.98668	2.14e-09	1.15e-07	NO
CSTA	14.7307	7.63111	1.27902	5.96637	2.43e-09	1.29e-07	NO
ST3GAL5	14.2006	-5.7473	0.964391	-5.95952	2.53e-09	1.34e-07	NO
RNF145	31.0078	-4.57141	0.770126	-5.93592	2.92e-09	1.54e-07	NO
MT-ND5	241.517	-2.71766	0.458216	-5.93096	3.01e-09	1.58e-07	NO
POSTN	26.1663	7.04493	1.19075	5.91636	3.29e-09	1.71e-07	NO
ADCY1	16.4812	-5.45901	0.925277	-5.89986	3.64e-09	1.88e-07	NO
HSD17B14	4.65954	-5.95009	1.00921	-5.89578	3.73e-09	1.91e-07	NO
S100A16	10.0429	5.20732	0.886291	5.8754	4.22e-09	2.14e-07	NO
MIA	6.92883	-4.92221	0.837759	-5.87545	4.22e-09	2.14e-07	NO
ADAM10	43.8722	-2.8028	0.47798	-5.86386	4.52e-09	2.28e-07	NO
NNT	75.2899	-3.8938	0.665179	-5.85376	4.81e-09	2.4e-07	NO
AEBP1	54.1704	-3.71679	0.635847	-5.84541	5.05e-09	2.51e-07	NO
PDCD4	181.323	-4.48009	0.769059	-5.82541	5.7e-09	2.81e-07	YES
KLF10	10.6355	5.56462	0.957545	5.81134	6.2e-09	3.04e-07	NO
GAS6	15.4608	5.75415	0.990819	5.80747	6.34e-09	3.1e-07	NO
MPZL2	8.79505	6.94643	1.19845	5.79618	6.78e-09	3.29e-07	NO
THOC5	7.8518	-5.20367	0.898968	-5.7885	7.1e-09	3.42e-07	NO
SEMA3C	4.87147	6.76473	1.17039	5.77989	7.47e-09	3.56e-07	NO
RAB27A	45.9799	-3.83858	0.664058	-5.78049	7.45e-09	3.56e-07	NO
CLCA2	6.3969	6.36781	1.10217	5.77754	7.58e-09	3.59e-07	NO
COPZ1	17.1564	-5.81788	1.01007	-5.7599	8.42e-09	3.96e-07	NO
NDUFA4	66.2645	-3.86182	0.672034	-5.74646	9.11e-09	4.27e-07	NO
FPR3	4.50093	14.4838	2.52137	5.74442	9.22e-09	4.29e-07	NO
SON	66.4759	-3.76125	0.658029	-5.71593	1.09e-08	5.05e-07	NO
PEBP1	56.2923	-2.89253	0.511892	-5.65067	1.6e-08	7.34e-07	NO
COPS6	8.59195	-4.93831	0.874026	-5.65007	1.6e-08	7.34e-07	NO
MLANA	144.154	-2.80204	0.496518	-5.64338	1.67e-08	7.58e-07	NO
GSTP1	63.6696	-3.10554	0.552948	-5.61633	1.95e-08	8.82e-07	NO
ITGB4	5.95578	6.27004	1.11732	5.61165	2e-08	9.01e-07	NO
TGDS	4.63809	-9.86856	1.76934	-5.57754	2.44e-08	1.09e-06	NO
EPSTI1	12.7089	-5.8417	1.04903	-5.5687	2.57e-08	1.14e-06	NO
FABP5	92.3508	3.98117	0.715779	5.56201	2.67e-08	1.18e-06	NO
FYB1	19.9275	-5.25131	0.944847	-5.55784	2.73e-08	1.2e-06	NO
S100A13	16.006	-4.2423	0.768826	-5.5179	3.43e-08	1.5e-06	NO
SNRPN	11.4844	-5.91596	1.07685	-5.49378	3.93e-08	1.71e-06	NO
TM2D1	21.1201	-5.038	0.918406	-5.48559	4.12e-08	1.78e-06	NO
NT5DC3	18.1286	-3.46227	0.631717	-5.48074	4.24e-08	1.82e-06	NO
S100A6	114.046	-2.85365	0.523014	-5.45616	4.87e-08	2.08e-06	NO
USP8	48.793	-2.88063	0.533705	-5.39743	6.76e-08	2.88e-06	NO
MTATP6P1	34.7445	-3.39435	0.629413	-5.39288	6.93e-08	2.94e-06	NO
TGFBI	41.4334	-4.41166	0.818971	-5.38683	7.17e-08	3.02e-06	NO
METTL9	71.3454	-4.04347	0.750976	-5.38428	7.27e-08	3.05e-06	NO
SOX10	39.9305	-3.72499	0.692786	-5.37683	7.58e-08	3.14e-06	YES
S100B	31.8048	-4.40874	0.819892	-5.37722	7.56e-08	3.14e-06	YES
COL9A1	27.7502	-3.96865	0.738461	-5.37423	7.69e-08	3.16e-06	YES
ABCC11	12.019	-5.22014	0.971222	-5.37481	7.67e-08	3.16e-06	NO
MTRNR2L1	46.6819	-2.77676	0.518468	-5.3557	8.52e-08	3.48e-06	NO
RBPMS2	9.01293	-6.0123	1.12331	-5.35233	8.68e-08	3.53e-06	NO
TNC	33.5545	4.447	0.831362	5.34906	8.84e-08	3.57e-06	NO
PRDX3	28.8322	-4.02138	0.753042	-5.34017	9.29e-08	3.73e-06	NO
IGKC	317.892	7.81916	1.46745	5.32838	9.91e-08	3.97e-06	NO
CRTAC1	19.3298	-4.33333	0.814066	-5.32307	1.02e-07	4.06e-06	NO
HLA-B	346.689	-2.74882	0.516509	-5.32192	1.03e-07	4.07e-06	NO
TXNIP	151.522	2.49071	0.469161	5.30887	1.1e-07	4.35e-06	NO
NADSYN1	121.316	-3.91795	0.738271	-5.30693	1.11e-07	4.37e-06	YES
S100A4	45.8574	-4.35667	0.821252	-5.30491	1.13e-07	4.4e-06	NO
COX7C	38.0397	-3.04421	0.574072	-5.30284	1.14e-07	4.43e-06	NO
CBX3	45.1769	-3.49845	0.660854	-5.29383	1.2e-07	4.63e-06	NO
CDK2	53.3662	-3.29559	0.624084	-5.28069	1.29e-07	4.95e-06	YES
ANXA5	151.946	-3.04096	0.578046	-5.26076	1.43e-07	5.49e-06	NO
RBM28	88.0705	-4.20585	0.802432	-5.24138	1.59e-07	6.07e-06	NO
SERPINB5	17.1339	5.17966	0.989515	5.23454	1.65e-07	6.27e-06	NO
PYGB	25.9299	-3.65961	0.699306	-5.23321	1.67e-07	6.29e-06	YES
ATP1A1	72.378	-2.39427	0.457781	-5.23017	1.69e-07	6.36e-06	NO
SERPING1	91.8073	-2.71783	0.519805	-5.22855	1.71e-07	6.39e-06	NO
BRI3	57.9512	-3.41412	0.653138	-5.22726	1.72e-07	6.4e-06	YES
F2R	9.99748	4.6351	0.887982	5.21982	1.79e-07	6.64e-06	NO
GNS	23.2481	-3.35725	0.644402	-5.20988	1.89e-07	6.97e-06	NO
IFI6	128.294	-2.98803	0.574564	-5.20052	1.99e-07	7.3e-06	NO
DAZAP2	57.8731	-3.56407	0.687111	-5.18704	2.14e-07	7.81e-06	NO
SNX5	10.3825	-4.81964	0.929843	-5.18328	2.18e-07	7.93e-06	NO
CA12	6.31346	6.43214	1.24169	5.18014	2.22e-07	8.03e-06	NO
SPINK5	4.16503	5.94767	1.14965	5.17345	2.3e-07	8.29e-06	NO
MALSU1	15.4205	-5.44197	1.05229	-5.17154	2.32e-07	8.33e-06	NO
TBC1D7	24.5118	-4.37501	0.847315	-5.16338	2.43e-07	8.67e-06	YES
RPLP1	321.178	-1.43657	0.278295	-5.16203	2.44e-07	8.69e-06	NO
ZMYM3	7.99522	-3.33589	0.646498	-5.15995	2.47e-07	8.75e-06	NO
PLEKHB1	11.308	-5.79553	1.1235	-5.15847	2.49e-07	8.78e-06	NO
CALU	25.0222	-3.49552	0.680439	-5.13716	2.79e-07	9.79e-06	NO
TRIM63	5.05166	-4.43912	0.865109	-5.13128	2.88e-07	1.01e-05	NO
IFIT1	7.69083	-5.2333	1.0212	-5.12465	2.98e-07	1.04e-05	NO
QARS1	5.22508	-4.78287	0.935218	-5.11417	3.15e-07	1.09e-05	NO
PDE10A	4.20453	-8.77383	1.71666	-5.111	3.2e-07	1.11e-05	NO
HPS5	29.9515	-3.75732	0.736838	-5.09925	3.41e-07	1.17e-05	NO
ATP5MF	38.4371	-3.18261	0.625899	-5.08486	3.68e-07	1.26e-05	NO
TSPAN14	147.328	-3.33117	0.655619	-5.08095	3.76e-07	1.28e-05	NO
SERF2	123.158	-2.34234	0.46131	-5.07758	3.82e-07	1.3e-05	NO
RPL7P9	1.25234	-19.0744	3.75837	-5.07518	3.87e-07	1.31e-05	NO
CNN3	10.2168	-4.49954	0.887248	-5.07135	3.95e-07	1.33e-05	NO
SLC35E3	63.2593	-2.76703	0.546428	-5.06385	4.11e-07	1.38e-05	NO
FBXO22	21.7084	-4.77653	0.943765	-5.06115	4.17e-07	1.39e-05	NO
EEF1A1	740.369	-0.988022	0.195738	-5.04767	4.47e-07	1.49e-05	NO
NHLRC3	29.7721	-4.90648	0.972542	-5.045	4.54e-07	1.5e-05	NO
CTSL	76.9872	-3.38712	0.673442	-5.02956	4.92e-07	1.62e-05	YES
DYNC1H1	141.989	-3.51115	0.698263	-5.02841	4.95e-07	1.62e-05	NO
CD164	54.8368	-3.50416	0.69753	-5.02366	5.07e-07	1.65e-05	NO
SIPA1	6.51056	-5.57732	1.11019	-5.02373	5.07e-07	1.65e-05	NO
CITED1	4.11608	-5.04499	1.00492	-5.02027	5.16e-07	1.67e-05	NO
PTPRU	7.18454	-5.07651	1.01282	-5.01223	5.38e-07	1.74e-05	NO
GASK1B	18.9349	-5.41123	1.08116	-5.00501	5.59e-07	1.8e-05	NO
COL6A1	67.2342	4.49388	0.90079	4.98882	6.07e-07	1.94e-05	NO
UHRF1	7.51969	-6.84303	1.37232	-4.98648	6.15e-07	1.96e-05	NO
DDX5	146.872	-1.93928	0.391503	-4.95343	7.29e-07	2.32e-05	NO
NANS	11.7536	-3.69973	0.74788	-4.94696	7.54e-07	2.38e-05	NO
VPS53	18.5085	-2.80863	0.568282	-4.94231	7.72e-07	2.43e-05	NO
IFFO2	16.6192	5.10028	1.0322	4.94118	7.76e-07	2.44e-05	NO
FMNL2	28.0219	-4.51151	0.913347	-4.93953	7.83e-07	2.45e-05	NO
PIR	11.4493	-4.51327	0.917772	-4.91764	8.76e-07	2.73e-05	NO
MTND4P12	2.97377	-3.10919	0.63339	-4.90881	9.16e-07	2.84e-05	NO
IGFBP2	20.6144	-5.48014	1.1167	-4.90744	9.23e-07	2.85e-05	NO
SOX4	5.65351	5.37936	1.09642	4.90629	9.28e-07	2.86e-05	NO
CDCP1	3.28074	5.07588	1.03664	4.89649	9.76e-07	2.99e-05	NO
CXCL12	40.7751	5.85402	1.19849	4.88451	1.04e-06	3.17e-05	NO
PTP4A2	60.7243	-3.8514	0.790903	-4.86963	1.12e-06	3.4e-05	NO
PGRMC1	12.5485	-4.54096	0.932774	-4.86823	1.13e-06	3.41e-05	NO
MRPL42	28.1998	-3.74542	0.770239	-4.86268	1.16e-06	3.5e-05	NO
BSG	12.1972	-3.26455	0.671688	-4.86022	1.17e-06	3.53e-05	NO
CCND2	11.4948	5.98181	1.23264	4.85285	1.22e-06	3.65e-05	NO
TOMM20	55.6985	-3.52502	0.726569	-4.8516	1.22e-06	3.66e-05	NO
SLC7A6	7.87541	7.59654	1.56685	4.84829	1.25e-06	3.71e-05	NO
CHCHD1	9.47384	-6.34517	1.3109	-4.84032	1.3e-06	3.84e-05	NO
ARPP19	41.3617	-3.36561	0.695942	-4.83604	1.32e-06	3.91e-05	NO
IFITM3	103.503	-2.24246	0.464036	-4.83251	1.35e-06	3.95e-05	NO
RAB5B	43.3679	-2.71497	0.561706	-4.83344	1.34e-06	3.95e-05	NO
TIMP1	20.895	-3.53112	0.731558	-4.82685	1.39e-06	4.05e-05	NO
CAPN3	104.679	-2.62727	0.545166	-4.8192	1.44e-06	4.2e-05	NO
IL1RAP	30.5079	-4.66049	0.970339	-4.80295	1.56e-06	4.53e-05	NO
CSE1L	9.32069	-4.44071	0.925504	-4.79816	1.6e-06	4.63e-05	NO
PDIA3	26.5393	-3.05218	0.637184	-4.7901	1.67e-06	4.8e-05	NO
SEZ6L2	6.62753	-5.42836	1.13518	-4.78194	1.74e-06	4.97e-05	NO
PNRC2	8.49743	-6.0753	1.27052	-4.78176	1.74e-06	4.97e-05	NO
SERPINF1	53.3223	-2.67912	0.560547	-4.77946	1.76e-06	5.01e-05	NO
DNAJC3	9.68075	-5.50179	1.15485	-4.76409	1.9e-06	5.38e-05	NO
CSTB	55.5913	-4.68471	0.984135	-4.76024	1.93e-06	5.47e-05	NO
PPIE	7.20833	-7.10419	1.49569	-4.74977	2.04e-06	5.74e-05	NO
LYST	87.3073	-3.58866	0.756467	-4.74397	2.1e-06	5.89e-05	NO
LSM5	18.6594	-5.22352	1.1018	-4.74088	2.13e-06	5.96e-05	NO
CCDC71L	7.60549	-6.08316	1.28433	-4.73644	2.18e-06	6.07e-05	NO
IGF2BP2	20.6844	-4.88932	1.03429	-4.72724	2.28e-06	6.33e-05	NO
PIGT	7.75513	-4.50708	0.956705	-4.71104	2.46e-06	6.83e-05	NO
CSF1	6.17094	-6.13787	1.31047	-4.68372	2.82e-06	7.78e-05	NO
TSNAX	14.8277	-4.31135	0.922867	-4.67169	2.99e-06	8.22e-05	NO
AAK1	126.924	-3.54105	0.758627	-4.66771	3.05e-06	8.35e-05	NO
MAN2B2	11.7723	-4.12588	0.884685	-4.66367	3.11e-06	8.49e-05	NO
TGOLN2	24.3423	-3.8784	0.832345	-4.6596	3.17e-06	8.63e-05	NO
LRPAP1	19.8658	-2.9216	0.628094	-4.65154	3.29e-06	8.94e-05	NO
BAZ2B	35.7549	-3.14023	0.675638	-4.6478	3.35e-06	9.07e-05	NO
RBIS	6.03432	-5.31454	1.14539	-4.63993	3.49e-06	9.39e-05	NO
SLC25A3	130.445	-2.90471	0.626858	-4.63376	3.59e-06	9.64e-05	NO
ELMO1	8.89116	-4.948	1.06849	-4.63084	3.64e-06	9.75e-05	NO
TTI2	7.04582	3.27052	0.710219	4.60495	4.13e-06	0.000110074	NO
CLEC7A	6.69594	5.17608	1.12675	4.59381	4.35e-06	0.000115733	NO
HHLA2	4.43919	-3.01322	0.65622	-4.59179	4.39e-06	0.000115938	YES
VAPA	51.8447	-3.95326	0.86102	-4.59137	4.4e-06	0.000115938	NO
COA6	8.77786	-5.42497	1.18147	-4.59171	4.4e-06	0.000115938	NO
LDHB	26.1931	-3.4961	0.761711	-4.5898	4.44e-06	0.000116431	NO
QSOX1	20.6759	-4.46852	0.975206	-4.58213	4.6e-06	0.00012039	NO
NPC2	66.5522	-2.46527	0.539968	-4.56559	4.98e-06	0.000129859	NO
DDB1	28.2773	-2.51088	0.550043	-4.56487	5e-06	0.000129882	NO
RASSF2	8.53412	-4.33142	0.949646	-4.56109	5.09e-06	0.000131816	NO
GATA3	6.97153	6.10714	1.34023	4.55679	5.19e-06	0.000134107	NO
WDR74	39.3414	2.70316	0.594906	4.54384	5.52e-06	0.000142162	NO
NID1	7.91434	9.87219	2.1748	4.53935	5.64e-06	0.000144762	NO
POMP	11.2438	-3.51975	0.776158	-4.53484	5.76e-06	0.000147413	NO
TFDP2	4.25899	2.90023	0.640608	4.5273	5.97e-06	0.000152283	NO
CRYAB	9.44915	-4.55084	1.00631	-4.52229	6.12e-06	0.000155437	NO
XAF1	64.9402	-2.97995	0.659527	-4.51831	6.23e-06	0.000157892	NO
CCS	7.25886	-6.82781	1.51194	-4.51593	6.3e-06	0.000159168	NO
APOE	76.089	-2.14899	0.476473	-4.51022	6.48e-06	0.000163004	NO
CCDC152	6.37187	5.64595	1.25203	4.50944	6.5e-06	0.000163092	NO
FAM3C	15.4805	-4.52364	1.00348	-4.50794	6.55e-06	0.000163728	NO
FAM114A1	12.3347	-4.45722	0.989215	-4.50582	6.61e-06	0.000164864	NO
IGLC2	706.957	5.78335	1.28665	4.4949	6.96e-06	0.000173015	NO
GNG5	49.2477	-3.36161	0.748072	-4.4937	7e-06	0.000173423	NO
CCT6A	30.7568	-3.78075	0.841462	-4.49308	7.02e-06	0.000173423	NO
RAB38	23.163	-3.71193	0.826693	-4.49009	7.12e-06	0.000175333	NO
COTL1	25.8694	-3.34261	0.74685	-4.4756	7.62e-06	0.000187077	NO
UROD	9.74568	-5.04698	1.13019	-4.46562	7.98e-06	0.000195419	NO
RUNX3	5.11084	4.79225	1.07399	4.46211	8.12e-06	0.000197438	NO
MGP	19.084	-6.62924	1.48561	-4.4623	8.11e-06	0.000197438	NO
ATP6AP1	12.9148	-4.33673	0.972302	-4.46027	8.19e-06	0.000198536	NO
SAMM50	5.74676	-5.51747	1.23729	-4.45931	8.22e-06	0.000198832	NO
SERINC3	36.6702	-4.35079	0.975964	-4.45794	8.28e-06	0.000199502	NO
RPS17	30.9785	-3.99783	0.898908	-4.44743	8.69e-06	0.000208886	NO
ACVR1	8.52968	-6.58729	1.48904	-4.42384	9.7e-06	0.000232361	NO
CPEB2	32.31	-3.8811	0.87883	-4.41622	1e-05	0.000239985	NO
VTI1B	13.6123	-4.95558	1.12511	-4.40454	1.06e-05	0.000252532	NO
MAL	4.39028	-5.41814	1.23031	-4.40387	1.06e-05	0.000252558	NO
SPRR2A	4.4262	6.04211	1.3729	4.40099	1.08e-05	0.000255178	NO
NRP2	26.2246	-3.33732	0.759684	-4.39304	1.12e-05	0.000263917	YES
KIT	4.32269	5.99993	1.36691	4.38941	1.14e-05	0.000267067	NO
KIN	15.7057	-4.10589	0.935459	-4.38918	1.14e-05	0.000267067	NO
TRIM8	6.58765	-4.58557	1.04494	-4.38838	1.14e-05	0.000267268	NO
TNS3	34.3731	-3.33383	0.760908	-4.38138	1.18e-05	0.000275192	NO
ARL15	4.13605	-6.36416	1.45337	-4.37891	1.19e-05	0.000277524	NO
RPS3	94.0598	-1.78843	0.409694	-4.36527	1.27e-05	0.000294565	NO
CTNNB1	77.2402	-2.57839	0.590907	-4.36344	1.28e-05	0.000296179	NO
SLC16A4	7.2425	-5.09849	1.16934	-4.36015	1.3e-05	0.00029894	NO
DOK5	5.67958	-10.0497	2.30467	-4.36058	1.3e-05	0.00029894	NO
DENND2A	6.84751	3.91464	0.899372	4.35264	1.35e-05	0.000308483	NO
LRRC8D	5.85447	-5.83435	1.34328	-4.34337	1.4e-05	0.000320879	NO
CYP51A1	16.726	-3.36095	0.774193	-4.34124	1.42e-05	0.000323087	NO
TBC1D4	30.8344	-4.83648	1.1145	-4.33959	1.43e-05	0.000324592	NO
IVL	5.82062	6.42237	1.4805	4.33797	1.44e-05	0.000325138	NO
FBLN2	20.6914	5.61905	1.29529	4.33806	1.44e-05	0.000325138	NO
H2AJ	11.3609	-5.01284	1.1588	-4.3259	1.52e-05	0.000342497	NO
TIMP2	61.1125	-2.24896	0.520216	-4.32313	1.54e-05	0.000345857	NO
MTPAP	10.6543	-3.60296	0.833819	-4.32103	1.55e-05	0.000347675	NO
BFAR	16.0109	-4.12776	0.955336	-4.32074	1.56e-05	0.000347675	NO
SKP1	127.107	-2.99828	0.694574	-4.31672	1.58e-05	0.000353086	NO
UBL3	48.5902	-3.63318	0.842464	-4.31257	1.61e-05	0.000358775	NO
PLOD1	6.56349	-4.58647	1.06744	-4.2967	1.73e-05	0.000384366	NO
GNAS	128.735	-1.63673	0.380988	-4.29602	1.74e-05	0.000384486	NO
MTCO1P40	3.49957	-1.82722	0.42555	-4.29379	1.76e-05	0.000387293	NO
RPS27L	260.456	-2.8573	0.665549	-4.29315	1.76e-05	0.000387342	YES
PSAP	150.003	-1.59928	0.372789	-4.29004	1.79e-05	0.000391736	NO
SERINC1	38.5185	-3.0804	0.719397	-4.28193	1.85e-05	0.000404087	NO
CPVL	35.2042	-3.12116	0.728841	-4.28236	1.85e-05	0.000404087	NO
SEC11C	27.414	-3.3875	0.791481	-4.27995	1.87e-05	0.000406576	NO
TSPAN3	58.6836	-2.98082	0.696772	-4.27804	1.89e-05	0.000407879	NO
GPR161	11.9132	-4.22507	0.987566	-4.27827	1.88e-05	0.000407879	NO
VPS26C	9.3888	-5.09214	1.19139	-4.27412	1.92e-05	0.000413997	NO
NAV2	6.80053	-5.32845	1.24732	-4.27191	1.94e-05	0.000417001	NO
SLC38A1	14.5782	5.22513	1.22418	4.26828	1.97e-05	0.000421568	NO
WASHC2A	6.182	-4.10456	0.96157	-4.2686	1.97e-05	0.000421568	NO
GLB1	5.86694	-6.29801	1.47584	-4.26741	1.98e-05	0.000422098	NO
UBE2H	8.51682	-4.4616	1.04616	-4.26472	2e-05	0.000426078	NO
TLNRD1	20.9686	-3.68985	0.867187	-4.25496	2.09e-05	0.000441564	NO
FMN1	60.8022	-4.66198	1.09579	-4.25443	2.1e-05	0.000441564	NO
FBXO32	15.218	-4.84054	1.13778	-4.25437	2.1e-05	0.000441564	NO
SLC39A14	2.5754	-7.08156	1.66425	-4.25512	2.09e-05	0.000441564	NO
C1S	82.9169	-2.49001	0.585753	-4.25096	2.13e-05	0.000447167	NO
S100A1	5.16332	-3.37665	0.795908	-4.24251	2.21e-05	0.00046313	NO
GALE	6.35313	-6.77744	1.59974	-4.2366	2.27e-05	0.000474244	NO
RPS9	5.68062	3.73474	0.88191	4.23483	2.29e-05	0.000476755	NO
F13A1	9.39654	6.2055	1.4668	4.23063	2.33e-05	0.000484469	NO
GAPDHS	7.35066	-4.63389	1.09704	-4.22401	2.4e-05	0.000497651	NO
DARS1	20.2335	-3.73763	0.885654	-4.22019	2.44e-05	0.000504844	NO
IMMT	6.29366	-5.08996	1.20671	-4.21805	2.46e-05	0.000508356	NO
GLOD4	11.2356	-3.7803	0.901919	-4.1914	2.77e-05	0.000570441	NO
C19orf53	5.72611	-3.95485	0.946526	-4.17828	2.94e-05	0.000602813	NO
RPL3P4	17.9494	-4.81604	1.15291	-4.17731	2.95e-05	0.000603843	NO
FSCN1	12.566	3.9725	0.952157	4.17211	3.02e-05	0.00061621	NO
C11orf96	9.80237	-3.72522	0.893675	-4.16843	3.07e-05	0.000624635	NO
SLC2A1	20.7271	3.56664	0.855914	4.16705	3.09e-05	0.000626511	NO
ACOT7	5.64031	-4.80559	1.15336	-4.16659	3.09e-05	0.000626511	NO
ZFP36L1	86.8279	1.99752	0.479721	4.16393	3.13e-05	0.000632265	NO
E2F3	10.9401	-4.66389	1.12028	-4.16313	3.14e-05	0.00063288	NO
ZNF562	19.2007	2.48565	0.597369	4.161	3.17e-05	0.000637209	NO
ROPN1	4.48823	-5.46718	1.31416	-4.16021	3.18e-05	0.000637822	NO
EIF2AK2	21.0264	-3.16618	0.761593	-4.15731	3.22e-05	0.000644345	NO
UBXN6	4.83278	-4.60911	1.10956	-4.15401	3.27e-05	0.000652083	NO
LRRN4CL	12.759	-3.62637	0.873168	-4.15312	3.28e-05	0.000653	NO
EIF1AX	28.1733	-3.94579	0.950596	-4.15086	3.31e-05	0.000657864	NO
JAZF1	4.42049	-5.54118	1.33539	-4.1495	3.33e-05	0.000660149	NO
TMEM45A	149.072	1.53317	0.370503	4.13806	3.5e-05	0.000692203	NO
PLXNC1	29.1111	-3.20073	0.773833	-4.1362	3.53e-05	0.000696116	NO
CDK1	15.2855	-6.31755	1.52838	-4.13349	3.57e-05	0.000702666	NO
PPIB	29.9691	-2.36776	0.573195	-4.13082	3.61e-05	0.000707392	NO
SYNPR	3.63845	-5.44205	1.31728	-4.13129	3.61e-05	0.000707392	NO
MFGE8	34.1676	-2.50453	0.60663	-4.1286	3.65e-05	0.000712511	NO
SIKE1	14.0427	-6.2781	1.52085	-4.12802	3.66e-05	0.000712573	NO
ATP5F1A	111.007	-2.11074	0.511483	-4.1267	3.68e-05	0.000714925	NO
TBC1D15	13.5203	-4.27078	1.0352	-4.12556	3.7e-05	0.000716758	NO
VIRMA	26.6715	-4.71143	1.14237	-4.12426	3.72e-05	0.000719063	NO
C1QBP	22.8531	-3.46919	0.84162	-4.12203	3.76e-05	0.000722559	NO
SNX8	13.9192	-4.55546	1.105	-4.12257	3.75e-05	0.000722559	NO
ATP5MD	44.7449	-2.88278	0.699811	-4.11936	3.8e-05	0.000729225	NO
AUTS2	7.9042	-4.53572	1.10189	-4.11631	3.85e-05	0.000737181	NO
PSCA	9.82336	-5.5218	1.34238	-4.11344	3.9e-05	0.000744648	NO
NEDD4L	41.7623	-4.04811	0.984495	-4.11186	3.92e-05	0.00074747	NO
CCDC86	2.44676	-4.54088	1.10444	-4.11146	3.93e-05	0.00074747	NO
UQCR11	19.7844	-3.08112	0.751574	-4.09956	4.14e-05	0.000785098	NO
NGRN	47.8319	-3.9536	0.965661	-4.09419	4.24e-05	0.000801616	NO
NPM1	51.5758	-2.41221	0.589395	-4.0927	4.26e-05	0.000804905	NO
IFT81	16.0008	-3.52567	0.862377	-4.08832	4.35e-05	0.000818322	NO
TBC1D16	16.0834	-3.52082	0.861836	-4.08525	4.4e-05	0.000826069	NO
IMMP2L	7.79493	-6.07639	1.48747	-4.08504	4.41e-05	0.000826069	NO
COL1A1	109.002	3.27591	0.803734	4.07587	4.58e-05	0.000855313	NO
SPCS2	23.9803	-4.04832	0.993207	-4.07601	4.58e-05	0.000855313	NO
CABLES1	10.6875	-3.45087	0.847099	-4.07375	4.63e-05	0.000861131	NO
SNAP23	31.6999	-4.2675	1.04819	-4.07129	4.68e-05	0.000868255	NO
CSK	9.79907	-3.98343	0.979552	-4.06659	4.77e-05	0.0008839	NO
ESYT2	8.86376	-4.1434	1.02027	-4.06108	4.88e-05	0.00090294	NO
TEX30	5.6308	-5.5181	1.35985	-4.05789	4.95e-05	0.000913239	NO
GIMAP5	8.20733	8.54578	2.11089	4.04843	5.16e-05	0.000948761	NO
SP110	6.13433	-5.31224	1.31667	-4.03462	5.47e-05	0.00100402	NO
RPS12	144.012	-1.24477	0.30908	-4.02736	5.64e-05	0.00103314	NO
ASAH1	114.413	-2.45779	0.610354	-4.02682	5.65e-05	0.00103314	NO
ATP5F1E	93.3269	-1.95323	0.485181	-4.02578	5.68e-05	0.00103412	NO
IL13RA1	15.6815	-3.83424	0.952483	-4.02553	5.68e-05	0.00103412	NO
SMIM30	14.818	-4.09027	1.01638	-4.02434	5.71e-05	0.00103699	NO
MTND2P28	5.1708	-3.26499	0.811755	-4.02214	5.77e-05	0.00104202	NO
DIPK1B	10.4779	-3.76124	0.935103	-4.02228	5.76e-05	0.00104202	NO
TOMM70	9.16988	-5.56681	1.38432	-4.02134	5.79e-05	0.00104321	NO
NDUFS1	41.9343	-3.31448	0.824691	-4.01905	5.84e-05	0.001051	NO
THBS2	5.7502	5.63483	1.40306	4.01611	5.92e-05	0.00106182	NO
COX6C	61.0134	-2.65136	0.660628	-4.01339	5.99e-05	0.00107171	NO
CPT1C	7.46025	3.99193	0.998167	3.99926	6.35e-05	0.00113016	NO
FAM221A	31.9661	-2.84217	0.710632	-3.9995	6.35e-05	0.00113016	NO
STX3	20.3253	-4.34312	1.08573	-4.00018	6.33e-05	0.00113016	NO
VCAN	17.4227	5.73335	1.43963	3.98251	6.82e-05	0.00121022	NO
TCF4	22.1761	4.3101	1.08257	3.98138	6.85e-05	0.0012133	NO
ITGA2	6.16035	5.58386	1.40622	3.97083	7.16e-05	0.0012655	NO
TNS1	13.4996	-4.76133	1.19937	-3.96985	7.19e-05	0.00126788	NO
RNF114	15.8327	-3.10196	0.781895	-3.96723	7.27e-05	0.00127912	NO
FCGR3A	8.9754	-4.74362	1.19682	-3.96353	7.38e-05	0.00129626	NO
PRTG	5.39599	-5.27587	1.33247	-3.95948	7.51e-05	0.00131556	NO
HSP90AA1	92.6531	-2.02196	0.510796	-3.95845	7.54e-05	0.00131833	NO
TDRD12	2.19193	3.16984	0.800926	3.95773	7.57e-05	0.00131947	NO
SMARCB1	4.8874	5.19747	1.31588	3.94981	7.82e-05	0.00136093	NO
PKIG	5.16501	-5.37825	1.36258	-3.94711	7.91e-05	0.00137334	NO
EXOC5	8.70699	-4.83991	1.22718	-3.94393	8.02e-05	0.0013887	NO
MREG	19.5794	-3.26653	0.828601	-3.94222	8.07e-05	0.00139562	NO
RBPJ	23.758	-4.15114	1.054	-3.93848	8.2e-05	0.0014145	NO
EIF3F	30.8863	-3.11643	0.792148	-3.93415	8.35e-05	0.00143713	NO
ETV5	23.39	-3.88619	0.988041	-3.93322	8.38e-05	0.00143959	YES
SIK1	14.4539	5.48419	1.39506	3.93116	8.45e-05	0.00144889	NO
SORD2P	2.75011	-6.03577	1.53634	-3.92867	8.54e-05	0.00146086	NO
FAM210B	40.8772	-2.72719	0.695529	-3.92102	8.82e-05	0.00150478	NO
PLTP	50.6536	-1.99136	0.508486	-3.91625	8.99e-05	0.00152509	NO
CHCHD2	38.7714	-2.24745	0.573807	-3.91674	8.98e-05	0.00152509	NO
CYRIB	13.9052	-3.27821	0.836999	-3.91662	8.98e-05	0.00152509	NO
PMPCB	17.8743	-4.91214	1.25492	-3.91431	9.07e-05	0.00153417	NO
SNRPD1	32.0262	-2.93481	0.749918	-3.9135	9.1e-05	0.00153606	NO
SRGAP1	21.4558	-3.17343	0.812099	-3.9077	9.32e-05	0.00157014	NO
STAT5A	7.37328	-3.65162	0.934844	-3.90612	9.38e-05	0.00157706	NO
IER2	12.7987	4.13053	1.05781	3.90478	9.43e-05	0.0015825	NO
NECTIN1	5.77148	6.30001	1.61445	3.90228	9.53e-05	0.00159375	NO
HSPA8	71.62	-2.13206	0.546394	-3.90206	9.54e-05	0.00159375	NO
PHLDB1	21.5885	-3.11571	0.798922	-3.8999	9.62e-05	0.00160468	NO
SFI1	12.135	-2.93366	0.752984	-3.89605	9.78e-05	0.00162702	NO
ARNT2	10.0894	-3.37897	0.868728	-3.88956	0.000100427	0.00165736	NO
SCARB2	26.8442	-3.71776	0.955818	-3.88962	0.000100403	0.00165736	NO
NDUFAF8	9.1683	-3.84134	0.987388	-3.89041	0.000100075	0.00165736	NO
SGCE	9.54937	-5.50436	1.4147	-3.89083	9.99e-05	0.00165736	NO
COX8A	30.8583	-2.39683	0.616979	-3.88479	0.000102418	0.00168674	NO
PTPN12	26.9061	-3.31815	0.854599	-3.88269	0.000103306	0.00169786	NO
MAFB	7.49041	4.34149	1.11871	3.8808	0.000104113	0.00170763	NO
HINT1	55.8292	-2.68631	0.692503	-3.87914	0.000104827	0.00171582	NO
UBE2L6	24.8045	-2.90234	0.748517	-3.87745	0.000105555	0.00172422	NO
FEM1B	31.3985	-4.27677	1.10348	-3.87569	0.000106321	0.00173318	NO
ADGRG1	46.8592	-2.0455	0.528031	-3.87382	0.000107141	0.00174299	NO
OSTC	12.1211	-3.8726	1.0002	-3.87183	0.00010802	0.00175374	NO
THOC2	22.5474	-4.19029	1.08273	-3.8701	0.000108791	0.00175915	NO
DHCR24	2.87676	-4.45274	1.15055	-3.87009	0.000108793	0.00175915	NO
SEPTIN7	29.4988	-2.9036	0.750678	-3.86796	0.000109749	0.00177103	NO
NDUFB2	34.4587	-2.58447	0.6686	-3.8655	0.000110863	0.0017854	NO
SRP68	9.00961	-4.32085	1.12104	-3.85433	0.000116049	0.00186144	NO
RSBN1L	6.39822	-4.37099	1.13392	-3.85475	0.000115846	0.00186144	NO
PET100	11.9886	-3.60683	0.936057	-3.85321	0.000116578	0.00186618	NO
COX7A2	25.8069	-2.51608	0.653178	-3.85205	0.000117132	0.0018662	NO
SSH2	9.09734	-3.60287	0.935386	-3.85175	0.000117278	0.0018662	NO
RIPK4	3.93244	-4.3172	1.1208	-3.8519	0.000117204	0.0018662	NO
RPS23	95.1216	-1.4245	0.370507	-3.84472	0.000120692	0.00190913	NO
IGSF8	18.8493	-3.53621	0.91963	-3.84525	0.000120429	0.00190913	NO
YTHDF3	19.0249	-3.88532	1.01046	-3.84511	0.000120497	0.00190913	NO
GPR85	18.7029	0.52632	0.137181	3.83668	0.000124706	0.00196486	NO
UBE2J1	9.4049	-4.65907	1.2143	-3.83683	0.000124631	0.00196486	NO
SLC35D2	4.90485	-5.03882	1.31442	-3.83349	0.000126338	0.00198665	NO
MIF	22.9412	-2.44669	0.638973	-3.8291	0.000128614	0.00201848	NO
FOXP1	10.0294	3.72009	0.971711	3.82839	0.000128982	0.0020203	NO
NANOS1	9.96689	-4.8139	1.25788	-3.82701	0.000129709	0.00202772	NO
ACAP1	10.4811	6.36486	1.66423	3.8245	0.000131039	0.00204451	NO
CTNND1	95.6142	-2.24833	0.589749	-3.81235	0.00013765	0.00214348	NO
TUBA4A	2.71098	5.10234	1.33884	3.81103	0.000138391	0.00215084	NO
NDUFB6	10.912	-3.96405	1.04095	-3.80809	0.000140041	0.00217227	NO
KCNMB1	3.61735	3.86508	1.01546	3.80623	0.0001411	0.00218193	NO
HDGFL3	9.4368	3.69771	0.971537	3.80604	0.00014121	0.00218193	NO
G3BP1	16.2086	-3.76472	0.989626	-3.80418	0.000142272	0.00219412	NO
CREBZF	23.346	-3.75799	0.988822	-3.80047	0.000144421	0.00222298	NO
MET	30.1155	-3.20392	0.844002	-3.7961	0.000146988	0.00225815	NO
ABI2	8.06495	-3.17427	0.836531	-3.79457	0.000147901	0.00226782	NO
SGCD	17.4336	-3.64362	0.962468	-3.78571	0.000153273	0.00233676	NO
MAP4K2	6.1218	-4.42979	1.16994	-3.78634	0.000152885	0.00233676	NO
LYSMD2	4.07619	-7.72602	2.04067	-3.78602	0.00015308	0.00233676	NO
LGMN	36.3287	-2.18847	0.578269	-3.78452	0.000154003	0.00233898	NO
ZNF24	10.1519	-4.48696	1.18556	-3.78469	0.000153901	0.00233898	NO
COMT	17.9533	-2.7217	0.720913	-3.77535	0.000159781	0.00241755	NO
MAP2K6	9.18916	-4.21275	1.11573	-3.77578	0.000159509	0.00241755	NO
PRKD3	83.4571	-2.39918	0.635772	-3.77365	0.000160875	0.00242951	NO
RPN2	59.227	-2.2117	0.586382	-3.77177	0.000162094	0.00244331	NO
MITF	63.9647	-2.23911	0.593731	-3.77125	0.000162435	0.00244385	NO
STK17B	12.2357	4.12594	1.09499	3.768	0.000164559	0.00246788	NO
RPS27A	169.278	-1.52653	0.405145	-3.76787	0.000164649	0.00246788	NO
AZGP1	2.39649	-5.00321	1.32918	-3.76414	0.000167126	0.00250033	NO
ABCB5	21.0461	-3.23916	0.860761	-3.76314	0.000167795	0.00250565	NO
PEG10	35.7644	-4.30728	1.14574	-3.75939	0.000170329	0.00253876	NO
MCAM	18.0762	-2.94835	0.78443	-3.7586	0.00017087	0.00254208	NO
DUSP7	8.2032	4.45077	1.18476	3.7567	0.000172172	0.00254725	NO
CCN2	14.5628	-4.28271	1.13992	-3.75703	0.000171942	0.00254725	NO
AMOT	3.06864	-5.65006	1.50399	-3.7567	0.000172166	0.00254725	NO
TULP4	23.2881	-3.43913	0.915986	-3.75457	0.000173641	0.00256425	NO
ATF1	3.75822	-8.6421	2.30276	-3.75294	0.000174775	0.00257623	NO
C12orf75	5.67398	5.97538	1.59404	3.74857	0.000177844	0.00261186	NO
SBSN	2.28646	5.0584	1.34934	3.74878	0.000177694	0.00261186	NO
CARD8	35.8966	-4.20539	1.12353	-3.74302	0.000181819	0.00266535	NO
LGALS3BP	56.1432	-2.25807	0.603395	-3.74227	0.000182369	0.00266645	NO
MXI1	12.1893	-4.39795	1.17529	-3.742	0.000182561	0.00266645	NO
PLSCR1	20.3064	-3.59238	0.96069	-3.73937	0.000184479	0.00268956	NO
EDNRB	74.2626	-2.99581	0.801295	-3.73871	0.000184965	0.00269174	NO
TNFSF10	3.09471	4.74454	1.26924	3.73809	0.000185426	0.00269241	NO
LAMTOR5	44.3439	-2.90272	0.776598	-3.73774	0.000185683	0.00269241	NO
RPUSD3	8.30578	-3.59802	0.96418	-3.73169	0.000190201	0.00275293	NO
SASH1	10.3852	-3.96912	1.06507	-3.72661	0.000194069	0.00280384	NO
ZFP36	28.7155	2.85411	0.766547	3.72333	0.000196612	0.00283547	NO
TSC22D3	37.051	2.52307	0.678063	3.721	0.000198435	0.00285292	NO
R3HCC1L	24.9641	-4.33549	1.16518	-3.72087	0.000198535	0.00285292	NO
SF3B2	25.3879	-2.8803	0.774823	-3.71736	0.000201313	0.00288249	NO
AIFM1	3.15312	-5.00205	1.34556	-3.71746	0.000201236	0.00288249	NO
RPS27	75.8918	-2.51421	0.676679	-3.71551	0.000202796	0.00289336	NO
LAP3	30.6144	-3.2981	0.8876	-3.71575	0.000202601	0.00289336	NO
CHCHD10	4.654	-3.69615	0.995175	-3.71407	0.000203953	0.00290469	NO
MRPS24	6.414	-4.17881	1.12588	-3.71159	0.000205959	0.00292806	NO
ACTB	263.298	-1.06926	0.288379	-3.70784	0.000209032	0.00294042	NO
GPRC5A	11.1827	-2.55396	0.688399	-3.71	0.000207257	0.00294042	NO
FLVCR1	4.24362	-3.09309	0.834153	-3.70807	0.000208848	0.00294042	NO
RCAN1	15.9116	-3.83386	1.0337	-3.70887	0.000208186	0.00294042	NO
COPS8	10.2637	-4.04584	1.09105	-3.70821	0.000208729	0.00294042	NO
POLR2J	4.38297	-4.1457	1.11757	-3.70957	0.000207613	0.00294042	NO
TIMM50	45.7302	-2.93372	0.791832	-3.70497	0.000211412	0.00296867	NO
EVPL	4.0481	5.20669	1.40615	3.7028	0.000213234	0.00298639	NO
CHID1	6.02091	-4.89552	1.32219	-3.70258	0.00021342	0.00298639	NO
CPQ	2.70984	5.15649	1.394	3.69907	0.000216388	0.00302264	NO
FBXL4	6.95429	-5.82773	1.57607	-3.69763	0.000217618	0.00303451	NO
RNF152	2.41584	4.56289	1.23471	3.6955	0.000219453	0.00305478	NO
RELL1	12.5475	-3.60163	0.97649	-3.68835	0.000225715	0.0031365	NO
STK24	30.4502	-3.21862	0.872882	-3.68735	0.000226601	0.00314335	NO
TOMM7	45.5854	-2.00638	0.544197	-3.68686	0.000227037	0.00314396	NO
XPOT	12.7129	-3.53396	0.959814	-3.68193	0.000231478	0.00319991	NO
IGFBP7	118.109	-1.7552	0.477003	-3.67965	0.000233554	0.00322209	NO
COMMD4	40.7348	-3.43649	0.93401	-3.67929	0.000233888	0.00322209	NO
PIM1	2.99683	4.74547	1.28998	3.67873	0.000234396	0.00322355	NO
ENO1	18.2525	-2.73326	0.743385	-3.67678	0.0002362	0.00322618	NO
HSPA9	35.0776	-3.44712	0.937458	-3.67709	0.000235906	0.00322618	NO
BUD31	4.55938	-3.7486	1.01952	-3.67683	0.00023615	0.00322618	NO
HMCN1	26.0231	-3.79497	1.03205	-3.67713	0.00023587	0.00322618	NO
IL2RG	13.8097	4.41949	1.20223	3.67608	0.000236849	0.00322955	NO
SEM1	29.4518	-2.84539	0.774463	-3.67402	0.000238767	0.00325015	NO
RNF213	52.7968	-2.35453	0.641072	-3.67281	0.000239901	0.00326005	NO
PLEKHA5	27.6001	-2.68487	0.732141	-3.66715	0.000245274	0.00332741	NO
HAS3	6.87715	6.62492	1.80784	3.66456	0.000247768	0.00334989	NO
SLC4A1	3.9055	2.438	0.665286	3.66459	0.000247737	0.00334989	NO
BIRC7	2.27647	-4.44925	1.21434	-3.66394	0.000248366	0.00335231	NO
SDHB	15.3053	-3.85578	1.05267	-3.66285	0.000249425	0.00336094	NO
NQO1	18.4274	-4.34418	1.18653	-3.66125	0.000250984	0.00337627	NO
CASP4	10.1964	5.02563	1.3735	3.65899	0.000253212	0.00339908	NO
GPD2	4.90539	-5.42538	1.48288	-3.65867	0.00025353	0.00339908	NO
OR7C1	3.88546	-4.20321	1.14927	-3.65728	0.000254902	0.00341176	NO
CHD3	4.16005	-3.66607	1.00377	-3.65232	0.000259884	0.00347264	NO
ARF1	48.3497	-2.12864	0.583327	-3.64913	0.000263129	0.00351014	NO
CLIP4	14.1149	-4.44804	1.2202	-3.64534	0.000267042	0.00355641	NO
FGFBP1	4.93473	6.19646	1.70104	3.64274	0.00026975	0.00358651	NO
RASSF3	30.6466	-2.95596	0.811701	-3.64169	0.000270854	0.00359522	NO
COX5A	14.0533	-3.09551	0.850988	-3.63755	0.000275249	0.00364307	NO
PRPSAP1	14.4214	-3.53572	0.972125	-3.6371	0.00027572	0.00364307	NO
ATXN10	7.75275	-4.31261	1.18576	-3.63701	0.000275825	0.00364307	NO
FHL2	25.7573	-3.84126	1.05727	-3.63319	0.000279941	0.00369135	NO
SYNJ2BP	3.2744	-3.53302	0.9733	-3.62994	0.00028349	0.003732	NO
CTSC	232.601	-2.50241	0.690413	-3.62452	0.000289503	0.0038049	NO
LSG1	4.38658	-5.25293	1.4521	-3.61746	0.000297505	0.00390365	NO
CEACAM1	15.1612	-3.09429	0.856587	-3.61234	0.000303444	0.00397253	NO
BAMBI	21.7225	-3.33909	0.924421	-3.61208	0.000303747	0.00397253	YES
DCBLD2	24.0415	-3.36906	0.933116	-3.61055	0.000305552	0.00398962	NO
TEX2	11.2446	-3.94025	1.09172	-3.60921	0.00030713	0.00400369	NO
BASP1	12.5576	3.53676	0.980443	3.60731	0.000309391	0.00402008	NO
GNG12	27.0459	-3.28745	0.911224	-3.60773	0.00030889	0.00402008	NO
PYROXD2	9.62713	-4.79041	1.3304	-3.60073	0.000317319	0.00411641	NO
TNS4	5.07577	4.77712	1.32857	3.59569	0.000323534	0.00414995	NO
TBCK	12.7598	3.88582	1.08047	3.5964	0.000322652	0.00414995	NO
HSP90B1	76.9322	-1.98615	0.552119	-3.59731	0.000321524	0.00414995	NO
DTX3L	11.6532	-2.76335	0.768265	-3.59687	0.000322065	0.00414995	NO
TMED10	42.3894	-2.81213	0.78165	-3.59768	0.000321068	0.00414995	NO
TSPAN4	5.67183	-3.22724	0.897519	-3.59573	0.000323487	0.00414995	NO
CTHRC1	14.6357	-3.90187	1.08467	-3.59729	0.000321555	0.00414995	NO
SRSF5	40.224	-2.1346	0.593975	-3.59375	0.000325947	0.00417421	NO
SRD5A1	18.0618	3.04395	0.847465	3.59183	0.000328364	0.00419844	NO
RPL38	132.8	-1.52168	0.42412	-3.58785	0.00033342	0.00425629	NO
CFAP36	7.36395	-5.75204	1.6059	-3.58181	0.000341216	0.00434888	NO
CTBP2	5.40879	4.76206	1.32988	3.58083	0.000342511	0.00435844	NO
RNF181	3.87163	-4.3286	1.20935	-3.57928	0.000344543	0.00437734	NO
RBM8A	41.5401	-3.24105	0.906356	-3.57591	0.000349011	0.00442708	NO
TNFAIP8	6.37078	4.09635	1.14705	3.57119	0.000355363	0.00449341	NO
AVPI1	3.95422	-3.86265	1.08152	-3.5715	0.000354947	0.00449341	NO
IMPA2	16.9788	2.82367	0.790972	3.56987	0.000357152	0.0045089	NO
RPL23A	69.4899	-1.39264	0.390169	-3.56933	0.000357891	0.00451111	NO
MT-ND4L	16.8897	-2.80993	0.790795	-3.5533	0.000380434	0.00478773	NO
SSRP1	10.1568	-3.63441	1.02386	-3.54972	0.000385635	0.00484555	NO
CLIC4	31.8877	-2.52533	0.712473	-3.54446	0.000393425	0.00493569	NO
SERPINB4	4.16293	5.95087	1.67991	3.54238	0.000396537	0.00496695	NO
MAP3K13	17.8127	-2.8721	0.811064	-3.54115	0.000398382	0.00497654	NO
NINJ1	3.7871	-4.36723	1.23332	-3.54104	0.000398546	0.00497654	NO
COL5A2	4.30807	-4.5609	1.28819	-3.54056	0.000399286	0.00497801	NO
RUBCN	11.3669	-3.24199	0.916546	-3.53719	0.000404415	0.0050263	NO
TFRC	18.7007	-3.48877	0.986227	-3.53749	0.000403947	0.0050263	NO
TRIM2	6.45722	-4.27926	1.21051	-3.53509	0.000407634	0.00505845	NO
TOR1AIP1	26.6987	-3.06743	0.869376	-3.52831	0.000418227	0.00518187	NO
MZT1	7.19205	-5.3067	1.50491	-3.52626	0.000421481	0.00521411	NO
PPID	3.95274	-3.55919	1.01006	-3.52373	0.00042551	0.00525583	NO
SPARC	103.355	-2.10553	0.597962	-3.52117	0.000429641	0.00528193	NO
SLIRP	20.4864	-2.93302	0.832826	-3.52177	0.000428681	0.00528193	NO
GUSB	10.0579	-3.77315	1.07174	-3.5206	0.000430579	0.00528193	NO
EHBP1	4.07123	-3.97125	1.1282	-3.51998	0.000431582	0.00528193	NO
CAT	8.12243	-4.69917	1.33463	-3.52095	0.000430006	0.00528193	NO
SUSD2	5.63815	-4.87703	1.38552	-3.52	0.00043154	0.00528193	NO
ARID5B	25.7353	-3.30342	0.939905	-3.51463	0.000440363	0.00538117	NO
LAD1	4.83602	4.87187	1.387	3.51251	0.000443889	0.00540714	NO
CCND1	19.7247	-2.19001	0.62366	-3.51154	0.000445511	0.00540714	NO
MXRA7	26.5272	-2.24909	0.640386	-3.51209	0.0004446	0.00540714	NO
NPIPA1	20.6186	-3.03902	0.865333	-3.51196	0.000444816	0.00540714	NO
PHGDH	2.88248	-4.12694	1.17532	-3.51133	0.000445866	0.00540714	NO
PRKY	3.65335	4.76186	1.35844	3.50538	0.000455952	0.00552109	NO
MCTS1	35.6467	-4.17505	1.19167	-3.50354	0.000459115	0.00555099	NO
SNU13	10.9018	-3.72785	1.06571	-3.49798	0.000468793	0.00565946	NO
FBXO38	3.85029	-3.97592	1.13707	-3.49665	0.000471145	0.00567928	NO
NDFIP2	2.30201	4.81311	1.37666	3.49623	0.000471881	0.0056796	NO
DPY19L4	6.41219	-3.93109	1.126	-3.49119	0.000480881	0.00577924	NO
ROPN1B	8.24501	-3.8751	1.1107	-3.48889	0.000485039	0.00582047	NO
CHCHD6	19.4178	-2.62684	0.753308	-3.48707	0.000488347	0.00585139	NO
ITGAV	23.3767	-2.91498	0.836767	-3.48363	0.00049467	0.00591829	NO
ACTG1	224.944	-0.997955	0.286548	-3.48268	0.00049642	0.00593037	NO
PDIA4	10.2079	-4.53872	1.30351	-3.48193	0.000497817	0.0059382	NO
SUMO2	95.6456	-1.8252	0.524922	-3.47708	0.000506902	0.0060286	NO
RPL35	28.4704	-2.07569	0.596927	-3.4773	0.000506498	0.0060286	NO
NOTCH1	7.19309	4.76288	1.37143	3.47293	0.00051481	0.00611356	NO
NECAP1	2.77565	-3.701	1.06594	-3.47205	0.0005165	0.00612454	NO
C5orf24	11.6868	-3.29467	0.949169	-3.47111	0.00051831	0.00613691	NO
FGFR1	9.99277	-3.34251	0.964112	-3.46694	0.000526425	0.00622379	NO
C21orf91	10.5525	-4.17907	1.20585	-3.46565	0.000528945	0.00624436	NO
ZNF638	6.28986	-3.90825	1.12821	-3.46411	0.000531989	0.00626183	NO
ODC1	3.25853	-4.74966	1.37096	-3.46449	0.000531241	0.00626183	NO
ZRANB2	31.9621	-3.33682	0.963568	-3.46298	0.000534224	0.0062789	NO
CXADR	10.0262	2.98436	0.862128	3.46162	0.00053693	0.00629445	NO
NDUFA1	29.5451	-2.56963	0.742339	-3.46153	0.00053712	0.00629445	NO
TMEM54	3.2591	4.94099	1.42779	3.4606	0.000538982	0.00630704	NO
CALML5	6.19377	5.89293	1.70309	3.46015	0.000539876	0.00630828	NO
HDDC2	8.62993	-4.01642	1.16255	-3.45482	0.000550656	0.0064155	NO
LTA4H	7.9968	-4.16492	1.20543	-3.45514	0.000550012	0.0064155	NO
ZC3H8	14.3193	-1.79309	0.519295	-3.45294	0.000554516	0.00644516	NO
UQCRFS1	15.6228	-3.34224	0.96798	-3.45279	0.000554812	0.00644516	NO
PLXNA1	25.0364	-2.42666	0.703295	-3.45041	0.00055973	0.00649287	NO
ATP6V0E2	5.66108	-4.62906	1.34219	-3.44888	0.000562914	0.00652035	NO
H2AZ2	55.8642	-2.8488	0.827297	-3.44351	0.000574226	0.0066328	NO
TSPAN13	4.28362	-5.19718	1.50928	-3.44348	0.000574279	0.0066328	NO
EHD4	16.6915	-2.66346	0.774089	-3.44076	0.00058008	0.00667092	NO
SLC12A9	9.1894	-3.15351	0.916323	-3.44148	0.00057854	0.00667092	NO
CLNS1A	21.5903	-3.93164	1.14264	-3.44083	0.000579938	0.00667092	NO
PDK1	4.03092	5.60274	1.62953	3.43827	0.000585451	0.00671131	NO
UBE2N	17.3623	-3.25417	0.946539	-3.43796	0.000586108	0.00671131	NO
WDR12	60.4457	-3.90569	1.13596	-3.43822	0.000585546	0.00671131	NO
RPS8	132.118	-1.1974	0.348632	-3.43457	0.000593499	0.00678624	NO
HNRNPH3	42.3064	-3.00767	0.876791	-3.43032	0.000602878	0.00686406	NO
PPARA	9.74306	-3.0243	0.88157	-3.43059	0.00060228	0.00686406	NO
SELENOI	7.29445	-5.05179	1.47247	-3.43083	0.000601748	0.00686406	NO
SLC31A1	5.93114	-2.4421	0.712476	-3.42762	0.000608904	0.00690321	NO
UTP6	13.6772	-2.64132	0.77053	-3.42793	0.000608194	0.00690321	NO
ELOC	17.4619	-2.7982	0.816347	-3.42771	0.000608705	0.00690321	NO
C11orf58	43.4887	-2.06688	0.603793	-3.42315	0.00061899	0.00700763	NO
CISD3	5.11239	-6.38149	1.86519	-3.42136	0.000623083	0.00704401	NO
RAB13	15.1768	-2.77644	0.812147	-3.41864	0.000629349	0.00710481	NO
ZCCHC10	5.06759	-5.80187	1.69811	-3.41666	0.000633948	0.00714665	NO
GPNMB	143.474	-1.67237	0.489581	-3.41592	0.00063568	0.00715609	NO
GAPDH	104.92	-1.60323	0.46956	-3.41432	0.000639403	0.0071879	NO
HBP1	9.54935	-3.22883	0.946245	-3.41225	0.00064429	0.00722342	NO
CYB5B	25.4865	-4.34686	1.27391	-3.41222	0.000644368	0.00722342	NO
CYB561A3	19.8942	2.34704	0.688868	3.4071	0.000656568	0.00734989	NO
IRX6	4.43576	-5.90313	1.73283	-3.40664	0.000657674	0.00735199	NO
SOD2	1051.12	-1.24911	0.36674	-3.40597	0.000659287	0.00735973	NO
CCDC50	59.2423	-3.05179	0.896359	-3.40465	0.000662483	0.00737903	NO
NDUFA5	9.61182	-3.61209	1.06098	-3.4045	0.000662859	0.00737903	NO
ARV1	2.69093	-5.24338	1.54128	-3.40197	0.00066902	0.00743728	NO
BTG1	50.1337	-2.15764	0.634951	-3.39812	0.000678508	0.00753228	NO
HSP90AB1	74.077	-1.64812	0.485188	-3.39686	0.000681636	0.00755653	NO
BTN2A1	15.4718	-4.88839	1.43946	-3.39599	0.0006838	0.00757004	NO
GDPD5	3.71725	-4.7869	1.41283	-3.38815	0.000703646	0.00777899	NO
PLA2R1	1.92345	2.89196	0.854098	3.38598	0.000709239	0.00783	NO
EIF4G2	69.2175	-1.68162	0.496989	-3.38362	0.00071536	0.0078867	NO
DVL3	26.4613	-3.49265	1.03297	-3.38116	0.000721808	0.00794684	NO
ARMCX3	4.59382	-4.84374	1.4332	-3.37966	0.000725748	0.00797924	NO
MYL12B	31.2286	-2.11137	0.625178	-3.37723	0.000732201	0.00803914	NO
CCL19	6.55332	4.84117	1.43513	3.37334	0.000742625	0.00814243	NO
EFR3B	5.44263	-4.09427	1.21388	-3.37288	0.000743866	0.00814487	NO
BUB3	76.7367	-2.45896	0.729258	-3.37186	0.000746618	0.00816384	NO
CEMIP2	5.49778	-5.2072	1.54507	-3.3702	0.000751143	0.00820211	NO
ATAD2	7.92879	-4.65387	1.38138	-3.36899	0.000754431	0.00822679	NO
CGGBP1	15.4211	-3.25608	0.967015	-3.36714	0.000759518	0.008271	NO
HIGD2A	12.0653	-2.59804	0.773221	-3.36002	0.000779362	0.00846406	NO
SMIM13	3.19248	-4.9924	1.48578	-3.36012	0.000779083	0.00846406	NO
SEC61A1	4.06707	-2.76928	0.824311	-3.35951	0.000780822	0.00846843	NO
FGFR2	4.69088	4.61139	1.3734	3.35766	0.000786064	0.00851374	NO
CRK	15.0399	-3.36805	1.00344	-3.35651	0.000789318	0.00853743	NO
CDK2AP1	20.8339	-3.55916	1.06136	-3.3534	0.000798265	0.00862255	NO
TTYH2	8.64804	-3.19742	0.953982	-3.35166	0.000803278	0.00866501	NO
DDOST	16.2466	-2.64465	0.789613	-3.3493	0.000810149	0.00872737	NO
DUOX1	15.1467	2.87002	0.857325	3.34764	0.000815029	0.00876813	NO
PLAAT4	8.23243	-3.32051	0.992273	-3.34637	0.000818783	0.00879669	NO
SELENOH	27.6946	-2.22494	0.665645	-3.34253	0.00083018	0.00890719	NO
NUGGC	1.44584	3.54355	1.06045	3.34156	0.000833097	0.0089265	NO
DDI2	8.10048	-2.95702	0.885021	-3.34119	0.000834211	0.0089265	NO
RSL1D1	5.96002	-3.22752	0.966352	-3.3399	0.000838082	0.00895595	NO
AOPEP	8.37475	3.23853	0.970119	3.33828	0.000842995	0.00899644	NO
PKP3	1.67594	4.62298	1.38549	3.33671	0.000847769	0.00901134	NO
FARP1	61.674	-2.57643	0.772129	-3.33679	0.000847523	0.00901134	NO
RAB11A	88.7808	-2.86915	0.859813	-3.33694	0.00084705	0.00901134	NO
GTF2IRD2	14.0521	-2.46207	0.73843	-3.33419	0.00085548	0.00908125	NO
DHRS7	16.1702	-3.11524	0.935705	-3.3293	0.000870652	0.00923006	NO
TMEM175	2.9714	5.25292	1.57825	3.32832	0.000873706	0.00923796	NO
COPA	16.0754	-3.86699	1.16178	-3.32851	0.000873131	0.00923796	NO
ANXA8	4.11198	5.64706	1.69717	3.32734	0.000876791	0.00925835	NO
JUN	22.6405	2.92977	0.881322	3.32429	0.000886452	0.00934804	NO
RBM47	22.8487	1.74405	0.524717	3.32379	0.000888042	0.00935248	NO
CA2	2.58567	5.26496	1.58425	3.32332	0.000889532	0.00935586	NO
BGN	8.24002	5.23997	1.57726	3.3222	0.000893108	0.00938115	NO
SWAP70	20.2086	-2.74874	0.827724	-3.32084	0.00089746	0.00940046	NO
GNPTAB	28.6994	-2.87879	0.867024	-3.32031	0.000899174	0.00940046	NO
TMEM248	30.6201	-3.06398	0.922605	-3.32101	0.000896919	0.00940046	NO
CABIN1	13.4972	-3.7628	1.13332	-3.32016	0.000899644	0.00940046	NO
MRPL20	15.6153	-2.93381	0.885004	-3.31503	0.000916347	0.0095625	NO
OAS1	6.78834	-3.5822	1.08076	-3.31451	0.000918053	0.00956783	NO
ENOSF1	2.53219	-3.18017	0.960384	-3.31135	0.000928479	0.00966391	NO
ALDH1A1	4.7746	-4.57901	1.38606	-3.30363	0.000954425	0.00992107	NO
SNX9	7.95865	-4.31148	1.30563	-3.30222	0.000959241	0.00995819	NO
GBP4	42.6042	-2.98252	0.90353	-3.30096	0.000963534	0.0099898	NO
SNX12	7.19651	-3.74498	1.13493	-3.29974	0.000967756	0.0100206	NO
SH2D3A	11.1734	2.73214	0.828298	3.2985	0.000972044	0.010052	NO
MOCS1	4.75036	-4.63562	1.40561	-3.29793	0.000974011	0.0100593	NO
NDUFV2	9.18274	-3.01978	0.91603	-3.29659	0.00097865	0.0100942	NO
TUBGCP4	5.36446	-2.80404	0.85079	-3.29581	0.000981401	0.0101096	NO
IL4R	5.89134	5.12303	1.55543	3.29364	0.000988983	0.0101746	NO
THBD	2.50764	5.07279	1.5412	3.29146	0.000996684	0.0102406	NO
UNC5CL	3.71616	-6.54136	1.98807	-3.29031	0.00100079	0.0102696	NO
RHEB	40.6195	-2.94528	0.895244	-3.28992	0.00100216	0.0102705	NO
PPT1	18.6046	-3.40063	1.03513	-3.28521	0.00101907	0.0104305	NO
LIMA1	51.5085	-2.09677	0.638781	-3.28246	0.00102906	0.0105192	NO
LRRC47	3.33961	-3.86681	1.17849	-3.28116	0.0010338	0.0105543	NO
MSL3	4.97691	-5.84528	1.78348	-3.27745	0.00104747	0.0106802	NO
ZNF394	5.55075	-3.31638	1.01284	-3.27433	0.00105913	0.010758	NO
COX7A2L	10.6237	-3.33813	1.0194	-3.2746	0.00105812	0.010758	NO
MESD	14.3519	-3.34454	1.02138	-3.27451	0.00105845	0.010758	NO
ST3GAL4	2.71194	-3.66524	1.12031	-3.27163	0.0010693	0.0108475	NO
PDE1C	2.8511	4.02357	1.23002	3.27115	0.0010711	0.0108521	NO
ZNF726	1.33613	3.33954	1.02117	3.27029	0.00107436	0.0108575	NO
EPN1	270.186	-2.2746	0.69546	-3.27063	0.00107306	0.0108575	NO
KLHDC2	12.914	-4.62637	1.41489	-3.26977	0.00107634	0.0108638	NO
RPL32	88.5371	-1.45802	0.446331	-3.26668	0.00108815	0.0109599	NO
UVRAG	15.007	-3.71584	1.13754	-3.26657	0.0010886	0.0109599	NO
KIAA2013	5.72027	-3.86345	1.18347	-3.26452	0.00109649	0.0110255	NO
PLD1	2.79562	-5.96638	1.82887	-3.26233	0.001105	0.0110972	NO
FBXL2	1.79225	3.76505	1.15543	3.25858	0.00111973	0.0111749	NO
ERH	22.7514	-2.72058	0.834548	-3.25994	0.00111435	0.0111749	NO
APOL2	8.16576	-3.17561	0.974397	-3.25905	0.00111784	0.0111749	NO
GTF2H5	6.36636	-3.95096	1.21219	-3.25936	0.00111664	0.0111749	NO
DPY19L1	2.62874	-4.40559	1.35192	-3.25877	0.00111897	0.0111749	NO
CHD1L	8.99722	-4.29155	1.31734	-3.25773	0.00112306	0.0111943	NO
OTUB1	19.15	-3.01299	0.926375	-3.25245	0.00114415	0.0113761	NO
ARSD	2.56427	-4.39199	1.35036	-3.25247	0.00114407	0.0113761	NO
ITM2C	15.9495	-3.03587	0.934803	-3.24761	0.00116379	0.011557	NO
SCOC	10.6212	-3.61361	1.11286	-3.24713	0.00116576	0.0115623	NO
LTB4R	2.38274	4.96711	1.53037	3.24568	0.00117169	0.0116066	NO
ZFYVE21	7.9619	2.21468	0.682645	3.24426	0.00117757	0.0116505	NO
BTNL9	1.26905	3.4686	1.06935	3.24367	0.00118	0.0116601	NO
APLP2	43.6324	-1.9113	0.589354	-3.24304	0.00118261	0.011664	NO
TMA7	69.5812	-2.00142	0.617211	-3.24268	0.00118411	0.011664	NO
PRDM7	4.86939	-4.92459	1.51875	-3.24252	0.00118476	0.011664	NO
TMBIM4	40.4406	-2.63876	0.815245	-3.23677	0.00120892	0.0118873	NO
CIDECP1	3.48457	-3.58183	1.10692	-3.23586	0.00121275	0.0118957	NO
POLR1D	10.0334	-3.65647	1.12988	-3.23616	0.00121151	0.0118957	NO
BIVM	4.46072	-4.17284	1.28985	-3.23513	0.00121587	0.0119117	NO
PAFAH1B1	39.8916	-3.05694	0.945254	-3.23399	0.00122072	0.01193	NO
TMEM179B	2.20821	-3.96209	1.22511	-3.23408	0.00122037	0.01193	NO
VAT1	25.0397	-2.23029	0.690125	-3.23171	0.00123052	0.0120111	NO
ARHGEF40	21.1346	-3.51782	1.08918	-3.2298	0.00123878	0.012077	NO
C3	32.8065	-2.59584	0.804784	-3.22551	0.00125746	0.0122442	NO
CDHR1	2.76097	5.31375	1.64834	3.22369	0.00126551	0.0122812	NO
EXOSC7	2.88782	3.81238	1.18264	3.22361	0.00126587	0.0122812	NO
SFXN3	7.62578	-3.43736	1.06626	-3.22376	0.00126521	0.0122812	NO
RPS19	100.166	-1.22006	0.378708	-3.22165	0.00127456	0.0123506	NO
CTXND1	4.13701	-5.90616	1.83555	-3.21765	0.00129244	0.0125087	NO
STK25	22.4378	-2.94318	0.914886	-3.21699	0.00129545	0.0125227	NO
NACA	74.8202	-1.63078	0.507039	-3.21628	0.00129864	0.0125384	NO
HMGB1	102.779	-1.72576	0.537606	-3.21009	0.00132694	0.0127962	NO
IPO5	1.87442	-3.23848	1.0097	-3.20737	0.00133953	0.012902	NO
NUP93	46.9659	-3.53766	1.10345	-3.206	0.00134593	0.0129481	NO
MT-ATP8	45.6088	-1.42269	0.444084	-3.20364	0.00135702	0.0130391	NO
EFNB1	3.19684	4.78085	1.49265	3.20292	0.00136043	0.0130563	NO
MICAL1	9.72417	-3.2174	1.00564	-3.19936	0.00137731	0.0132024	NO
RAB8B	17.6311	-3.64988	1.1413	-3.19801	0.00138379	0.0132328	NO
CCSAP	3.70074	-4.14432	1.29581	-3.19823	0.00138273	0.0132328	NO
GRSF1	19.3152	-3.37121	1.05508	-3.19522	0.00139726	0.0133457	NO
JAK3	20.0462	3.20858	1.0047	3.19356	0.00140532	0.0133906	NO
TRAK2	10.0742	-2.89062	0.905106	-3.19368	0.00140472	0.0133906	NO
RCBTB1	18.4289	-3.85013	1.20724	-3.18919	0.00142672	0.0135784	NO
CTSB	185.331	-1.27126	0.399258	-3.18406	0.00145227	0.0138052	NO
ATP13A3	11.1149	-3.81908	1.20049	-3.18126	0.00146634	0.0139224	NO
HMGCR	9.64824	2.09208	0.658058	3.17917	0.00147699	0.0139738	NO
GIGYF1	3.4217	-4.6572	1.46467	-3.1797	0.00147426	0.0139738	NO
FAM219B	5.23464	-4.85	1.52541	-3.17947	0.00147543	0.0139738	NO
ARHGDIB	19.1513	2.62696	0.826551	3.17822	0.00148183	0.014003	NO
COL11A1	23.8261	-3.89375	1.22537	-3.1776	0.00148499	0.0140164	NO
MCF2L	2.7866	4.14027	1.30422	3.17453	0.00150078	0.0141154	NO
STING1	7.57873	-3.2844	1.03455	-3.17473	0.00149978	0.0141154	NO
DDX3X	22.2856	-3.47191	1.09348	-3.17509	0.00149792	0.0141154	NO
HIPK2	21.7565	-2.87374	0.905407	-3.17397	0.00150367	0.014126	NO
ASRGL1	8.97351	-3.98819	1.25695	-3.17291	0.00150919	0.0141612	NO
IDI1	18.9952	-3.25085	1.02527	-3.17071	0.00152066	0.0142513	NO
THRAP3	8.8976	-4.02343	1.2691	-3.17031	0.00152278	0.0142513	NO
USP24	6.356	-4.03551	1.27301	-3.17005	0.00152413	0.0142513	NO
TIMP3	29.7189	-3.39941	1.07265	-3.16916	0.00152879	0.0142782	NO
SDC3	25.6714	-2.42202	0.764876	-3.16655	0.00154259	0.0143904	NO
IRX3	2.19255	4.55614	1.43936	3.16539	0.00154876	0.0144311	NO
RERE	15.133	-3.12563	0.987803	-3.16422	0.00155499	0.0144723	NO
ZFP36L2	82.2198	1.53082	0.483878	3.16365	0.00155806	0.0144796	NO
NBL1	15.5703	-2.5173	0.79576	-3.1634	0.0015594	0.0144796	NO
SMS	12.9802	-2.95954	0.935752	-3.16274	0.00156294	0.0144957	NO
KANK1	14.1489	-2.40428	0.760555	-3.16122	0.00157108	0.0145543	NO
VAC14	3.34551	-3.53632	1.11897	-3.16033	0.00157589	0.014582	NO
SOD1	21.5364	-2.19808	0.695637	-3.15981	0.00157871	0.0145859	NO
NDUFS5	16.6281	-2.82017	0.892575	-3.15958	0.00157995	0.0145859	NO
TBC1D32	6.47334	4.07207	1.28917	3.15866	0.00158494	0.014615	NO
COL22A1	16.0109	-4.02572	1.2752	-3.15694	0.00159432	0.0146847	NO
DSG3	8.85477	3.05293	0.967175	3.15654	0.00159653	0.014688	NO
EIF4EBP2	16.8551	-2.4708	0.78285	-3.15616	0.00159862	0.0146904	NO
NDUFB3	19.178	-2.9979	0.950625	-3.15361	0.00161267	0.0148025	NO
SLC12A6	2.63657	3.20568	1.01709	3.15182	0.00162257	0.0148763	NO
CCNI	31.8373	-2.1705	0.688724	-3.15147	0.0016245	0.014877	NO
PDCD6IPP2	4.80993	-4.06757	1.29105	-3.1506	0.00162937	0.0149045	NO
CUTA	5.20161	-3.45031	1.09705	-3.14509	0.00166038	0.0151709	NO
WDFY1	46.3597	-2.57488	0.818799	-3.14471	0.00166254	0.0151733	NO
CTCFL	1.46641	3.92352	1.2489	3.14157	0.00168043	0.0153191	NO
ALDH1B1	10.9742	-3.2813	1.04495	-3.14015	0.00168864	0.0153764	NO
LAMC1	19.0567	-2.91273	0.928035	-3.1386	0.00169759	0.0154404	NO
ACP6	17.6106	-6.31892	2.0141	-3.13733	0.00170492	0.0154894	NO
GCFC2	4.48768	-5.62425	1.79513	-3.13306	0.00172995	0.015699	NO
TMTC2	3.97647	5.49988	1.75589	3.13224	0.00173477	0.0157249	NO
OST4	33.7571	-2.38911	0.76311	-3.13076	0.00174355	0.0157688	NO
CHI3L1	5.16096	-4.57106	1.46005	-3.13076	0.00174352	0.0157688	NO
RXRG	7.8055	-3.67883	1.17589	-3.12854	0.00175677	0.0158627	NO
CPXM2	9.28493	-3.75487	1.20027	-3.12835	0.00175789	0.0158627	NO
EIF4A2	42.6519	-2.34251	0.748908	-3.12791	0.00176056	0.0158688	NO
MLPH	41.5229	-2.45779	0.786814	-3.12372	0.0017858	0.0160782	NO
APOL6	18.6245	-2.39114	0.766503	-3.11954	0.00181132	0.0162897	NO
LAPTM4A	38.0601	-1.80731	0.579673	-3.11782	0.00182196	0.016367	NO
METAP2	3.99236	-4.13894	1.3277	-3.11736	0.00182477	0.0163738	NO
MOK	29.2081	-3.05454	0.98037	-3.1157	0.00183509	0.016448	NO
GLMP	22.7499	-1.98916	0.638557	-3.11509	0.00183891	0.0164638	NO
PRKAR1A	67.5193	-1.97182	0.633084	-3.11463	0.00184177	0.016471	NO
PITX2	2.73679	-5.2474	1.68565	-3.11297	0.00185213	0.0165451	NO
RAD9A	9.72401	1.95019	0.627049	3.11011	0.00187021	0.0166595	NO
SCUBE1	5.80286	1.77233	0.569889	3.10995	0.00187118	0.0166595	NO
ZBTB38	6.821	-4.24033	1.36345	-3.10999	0.00187091	0.0166595	NO
SPRY2	6.05798	-5.62677	1.80997	-3.10877	0.00187867	0.0167076	NO
TMEM255A	5.64527	-5.61885	1.80869	-3.10658	0.00189264	0.0168132	NO
TPT1	255.645	-0.9522	0.306574	-3.10593	0.00189679	0.0168314	NO
MYO5A	24.3089	-2.13488	0.688323	-3.10157	0.00192498	0.0170626	NO
A2M	22.4294	-2.66275	0.858734	-3.10078	0.0019301	0.017089	NO
KCNIP3	5.40349	4.17174	1.3458	3.09981	0.00193644	0.0171263	NO
KRT16P6	1.74805	4.42045	1.42783	3.09593	0.00196197	0.0173217	NO
PDAP1	31.0935	-1.73288	0.559754	-3.09579	0.00196286	0.0173217	NO
CTDNEP1	16.4787	-2.42174	0.782376	-3.09537	0.0019657	0.0173276	NO
SNX27	27.4797	-2.0265	0.655129	-3.09329	0.0019795	0.01743	NO
LMO4	8.38333	3.16129	1.02379	3.08783	0.00201626	0.0177342	NO
INSYN1	2.04985	-3.93789	1.27621	-3.08563	0.00203124	0.0178274	NO
ATP9A	5.01641	-4.34276	1.40742	-3.08562	0.00203131	0.0178274	NO
GTF3C1	8.25706	-3.66969	1.18952	-3.08502	0.00203535	0.0178434	NO
INF2	7.3403	-4.0116	1.30075	-3.08406	0.002042	0.017882	NO
HERPUD1	22.145	-3.0532	0.991098	-3.08062	0.0020657	0.0180698	NO
GGH	4.9382	-3.6703	1.19164	-3.08004	0.00206974	0.0180763	NO
FAHD2CP	2.34432	-4.64811	1.50919	-3.07986	0.00207096	0.0180763	NO
SSPN	5.76728	-4.35382	1.41388	-3.07935	0.00207456	0.018088	NO
FYN	23.7135	-2.79343	0.907326	-3.07875	0.00207871	0.0181044	NO
ZNF330	12.8541	-2.9321	0.952517	-3.07827	0.00208206	0.0181139	NO
ATP5MC2	49.0359	-1.93435	0.62854	-3.07753	0.00208727	0.0181393	NO
ANAPC13	3.38961	-3.77456	1.22662	-3.07721	0.00208951	0.0181393	NO
IGFBP4	36.7082	2.76057	0.897846	3.07466	0.00210742	0.0182749	NO
PHC3	37.2664	2.90752	0.945975	3.07357	0.00211514	0.0183031	NO
RPL36A	84.5118	-1.72943	0.562703	-3.07344	0.00211607	0.0183031	NO
HSPA12A	1.32927	-3.46743	1.12827	-3.07323	0.00211752	0.0183031	NO
SNRPD2	15.8594	-2.3284	0.758265	-3.0707	0.0021356	0.0184394	NO
NDUFC1	29.979	-2.59262	0.844603	-3.06963	0.00214326	0.0184856	NO
DNAJC2	8.50297	-3.02348	0.985268	-3.06869	0.00215	0.0185238	NO
CDH3	15.9994	2.70627	0.882408	3.06691	0.00216281	0.0185941	NO
APP	41.9583	-1.65162	0.538518	-3.06697	0.00216237	0.0185941	NO
MAPKAPK5	16.0819	-2.04403	0.66686	-3.06515	0.00217562	0.0186841	NO
BAHCC1	14.1357	-3.16329	1.03235	-3.06416	0.00218284	0.0187261	NO
DSG2	9.8205	-3.23171	1.05493	-3.06344	0.0021881	0.0187511	NO
SARAF	44.7513	-2.01304	0.658022	-3.05923	0.00221908	0.0189963	NO
SPON2	11.7633	-2.7776	0.909031	-3.05556	0.00224641	0.019128	NO
MRPS25	20.5078	-3.62457	1.1862	-3.05561	0.00224604	0.019128	NO
ARHGEF7	3.21899	-3.65753	1.19688	-3.05589	0.0022439	0.019128	NO
FAR1	9.02846	-3.83197	1.25374	-3.05644	0.00223985	0.019128	NO
PFDN4	4.80208	-4.26374	1.39516	-3.05611	0.00224231	0.019128	NO
ZNF431	151.598	3.35532	1.09898	3.05312	0.00226473	0.0192634	NO
SORBS1	6.99017	-5.17102	1.69392	-3.0527	0.00226792	0.0192701	NO
PPP1R13L	11.0324	3.23581	1.0602	3.05208	0.00227263	0.0192896	NO
POGK	6.66847	-3.88896	1.27449	-3.05139	0.00227781	0.0193131	NO
VEGFB	14.8389	-2.17241	0.712047	-3.05094	0.00228129	0.0193222	NO
EIF4H	44.9884	-2.0392	0.668689	-3.04956	0.00229179	0.0193483	NO
SERBP1	50.8875	-2.49436	0.817998	-3.04935	0.0022934	0.0193483	NO
SNCA	29.7172	-2.82952	0.927832	-3.0496	0.00229143	0.0193483	NO
HIBADH	18.7408	-3.59661	1.1795	-3.04926	0.00229404	0.0193483	NO
PTPRG	2.84786	-4.13933	1.35764	-3.04893	0.00229661	0.0193496	NO
KRIT1	27.6089	-3.778	1.23956	-3.04785	0.00230484	0.0193984	NO
CHMP7	2.4476	-3.28135	1.07713	-3.04638	0.00231613	0.019473	NO
APRT	2.98012	3.82657	1.25652	3.04536	0.00232399	0.0195186	NO
MTRNR2L11	7.29653	-2.19243	0.720079	-3.0447	0.0023291	0.019541	NO
PSMG4	12.4011	-2.63346	0.865775	-3.04174	0.00235218	0.0196933	NO
GAB2	4.09605	-5.15322	1.6941	-3.04187	0.00235115	0.0196933	NO
BEX3	11.7342	-3.1617	1.04001	-3.04007	0.00236522	0.0197819	NO
ELOB	10.9447	-2.96447	0.975678	-3.03837	0.00237862	0.019863	NO
POLD2	1.88791	-3.70551	1.21964	-3.03821	0.00237988	0.019863	NO
SPN	11.6493	2.49083	0.82061	3.03534	0.00240267	0.0200103	NO
MFSD14B	35.4448	-3.03916	1.00139	-3.03494	0.00240584	0.0200103	NO
DNAJC8	3.16473	-3.31912	1.0934	-3.03558	0.0024007	0.0200103	NO
NOMO1	4.49806	-3.54573	1.16839	-3.03473	0.00240754	0.0200103	NO
IRF1	38.0201	2.16917	0.715001	3.0338	0.00241497	0.0200513	NO
UBE2D2	18.838	-3.32797	1.09832	-3.03004	0.00244521	0.0202813	NO
TMEM123	19.7013	2.33334	0.770353	3.02893	0.00245425	0.0203142	NO
PGRMC2	14.5516	-2.98593	0.98571	-3.02922	0.00245186	0.0203142	NO
TTC3	32.731	-1.98883	0.657083	-3.02676	0.00247192	0.0204393	NO
KDM5D	14.3282	-3.16032	1.04485	-3.02468	0.00248895	0.0205377	NO
MEIS2	1.38254	-5.00377	1.65421	-3.02487	0.00248738	0.0205377	NO
TMEM183A	4.22512	-3.9195	1.29608	-3.02412	0.00249361	0.020555	NO
PLAAT3	7.11053	-3.37244	1.11544	-3.02341	0.00249941	0.0205816	NO
PKD1L2	5.81614	-2.54721	0.843413	-3.02012	0.00252673	0.0207425	NO
BAZ2A	19.4439	-3.08052	1.01992	-3.02037	0.00252465	0.0207425	NO
MPZL1	15.6712	-3.31499	1.09758	-3.02028	0.00252543	0.0207425	NO
HNRNPA2B1	169.333	-1.36688	0.452826	-3.01855	0.00253989	0.0208239	NO
ARFGEF2	13.3307	-3.1925	1.05771	-3.01831	0.00254185	0.0208239	NO
SLC16A10	1.60919	3.0887	1.02399	3.01635	0.00255839	0.020938	NO
ANK3	1.56147	3.5435	1.17523	3.01515	0.00256856	0.0209998	NO
C1orf61	5.6564	-2.19453	0.728673	-3.01169	0.00259801	0.0212189	NO
SAP18	35.1358	-2.78455	0.92525	-3.00951	0.00261671	0.0213498	NO
SPNS1	9.92317	-2.85249	0.948025	-3.00887	0.00262217	0.0213726	NO
ADAM17	4.74488	-3.13225	1.04115	-3.00844	0.00262593	0.0213814	NO
KIF22	5.31971	3.71506	1.23534	3.00732	0.00263559	0.0214383	NO
NBPF9	32.8161	2.59706	0.863936	3.00608	0.0026464	0.0215044	NO
RRBP1	5.9267	2.96011	0.985261	3.00439	0.00266113	0.0216021	NO
RPS29	311.896	-0.972698	0.323891	-3.00316	0.00267188	0.0216637	NO
TBC1D10B	12.8689	-2.92195	0.973041	-3.00291	0.00267413	0.0216637	NO
PLAU	2.51735	4.82098	1.60622	3.00144	0.00268703	0.0217117	NO
XIAPP2	1.33242	3.75172	1.25003	3.00131	0.00268819	0.0217117	NO
INPP5F	9.83798	-3.73192	1.24321	-3.00184	0.00268351	0.0217117	NO
SGCB	2.41198	-4.4378	1.47911	-3.00032	0.00269698	0.0217607	NO
AP4E1	4.52666	3.83823	1.28089	2.99654	0.00273062	0.0219878	NO
CAPRIN2	12.2516	-4.31436	1.43964	-2.99683	0.00272807	0.0219878	NO
SLC25A44	16.0842	-3.18177	1.06213	-2.99565	0.00273861	0.02203	NO
APH1B	15.0067	-4.49342	1.50082	-2.99398	0.00275365	0.0221288	NO
GPX3	16.4166	-2.19005	0.73263	-2.98929	0.00279625	0.0224485	NO
SYTL1	15.2952	2.90736	0.973243	2.98729	0.00281467	0.0225738	NO
SUPT4H1	10.154	-3.49588	1.17093	-2.98555	0.00283065	0.0226792	NO
CALM2	60.2081	-1.68265	0.564004	-2.9834	0.00285061	0.0228162	NO
SEPHS2	4.48995	-3.42169	1.14754	-2.98175	0.00286606	0.0229171	NO
LENG9	1.77545	3.93612	1.32068	2.98037	0.00287898	0.0229963	NO
ITGB1BP1	30.5016	-3.37225	1.1316	-2.98008	0.00288172	0.0229963	NO
OSTM1	25.6958	-2.97434	0.998579	-2.97857	0.00289599	0.0230872	NO
WIPI2	3.49904	-2.97061	0.998205	-2.97595	0.00292082	0.0232619	NO
COA4	7.28167	-3.54162	1.19027	-2.97549	0.00292523	0.0232739	NO
KIFAP3	7.2827	-4.05082	1.36349	-2.97093	0.00296903	0.0235989	NO
UQCRQ	31.6535	-2.38374	0.802752	-2.96946	0.00298324	0.0236883	NO
SLCO1A2	2.86424	3.84585	1.29533	2.96901	0.00298765	0.0236998	NO
UBL5	45.6973	-1.8647	0.628192	-2.96837	0.00299388	0.0237257	NO
ZNF207	62.6614	-2.79551	0.942186	-2.96704	0.00300678	0.0238044	NO
CNDP2	28.5851	-2.1593	0.728355	-2.96463	0.0030305	0.0239448	NO
MGAT5	7.38296	-3.37942	1.13987	-2.96475	0.0030293	0.0239448	NO
WDR1	20.8699	-1.99682	0.673904	-2.96306	0.00304595	0.0240432	NO
EDEM1	16.3226	-3.20045	1.08239	-2.95683	0.00310822	0.0245105	NO
PSME1	32.6797	-1.87127	0.633033	-2.95604	0.00311613	0.0245487	NO
UNC50	5.86476	-3.57959	1.2114	-2.95491	0.00312762	0.024615	NO
MTIF2	4.63351	-3.45423	1.16921	-2.95433	0.00313349	0.0246329	NO
FUCA2	9.02625	-3.66184	1.23969	-2.95384	0.00313846	0.0246329	NO
RB1CC1	7.93085	-4.04521	1.3695	-2.95378	0.00313912	0.0246329	NO
RIC3	11.8159	4.22141	1.42979	2.95247	0.00315241	0.0247129	NO
FAM122C	8.32413	2.85167	0.966219	2.95137	0.0031637	0.0247529	NO
MLIP	4.61905	-4.73169	1.60307	-2.95164	0.00316087	0.0247529	NO
FXR1	19.6563	-3.30977	1.12185	-2.95029	0.00317475	0.0248151	NO
SNIP1	5.99599	3.14257	1.06563	2.94904	0.00318766	0.0248918	NO
MRPS22	3.0038	4.37596	1.4841	2.94856	0.00319253	0.0249055	NO
SHMT2	2.06531	-4.24967	1.44266	-2.94571	0.00322211	0.0251118	NO
PTMA	192.115	-1.13151	0.384354	-2.94394	0.00324064	0.0252316	NO
UFC1	8.11604	-2.8115	0.95665	-2.9389	0.00329378	0.0256075	NO
ST20	3.89565	-4.88381	1.66186	-2.93876	0.00329532	0.0256075	NO
IFT22	2.15462	-2.13614	0.726988	-2.93834	0.00329978	0.0256133	NO
MCCC2	4.90525	-3.47922	1.18418	-2.93809	0.00330246	0.0256133	NO
CKS2	4.11086	-4.56841	1.55518	-2.93753	0.00330833	0.025634	NO
GPX1	16.8458	-2.12321	0.722953	-2.93685	0.00331562	0.0256656	NO
RPL24	36.7113	-1.83839	0.626549	-2.93416	0.00334453	0.0258145	NO
RFXANK	2.00342	-4.74591	1.61745	-2.93419	0.00334417	0.0258145	NO
C15orf48	2.66194	-5.47091	1.86441	-2.93439	0.00334204	0.0258145	NO
AP1S3	4.97698	-2.20562	0.752332	-2.93171	0.00337098	0.0259936	NO
TMEM181	9.17128	-2.63367	0.898894	-2.92991	0.00339064	0.02612	NO
SUPT5H	12.1559	-3.02734	1.03352	-2.92917	0.00339871	0.026157	NO
SPP1	17.7792	-3.99323	1.36422	-2.92712	0.00342113	0.0263042	NO
SEC23B	4.09787	-6.11332	2.0915	-2.92294	0.00346749	0.0266351	NO
C1orf43	16.9272	-2.54315	0.870243	-2.92234	0.00347409	0.0266602	NO
SCGB3A2	2.57164	4.22566	1.44641	2.92148	0.00348371	0.0266828	NO
PIGM	3.03853	-3.37066	1.15363	-2.92177	0.00348047	0.0266828	NO
ABCA9	2.42842	2.84159	0.972832	2.92095	0.00348969	0.0267031	NO
AKT3	2.84035	-4.01093	1.37346	-2.92031	0.00349685	0.0267324	NO
HEATR5A	14.929	-2.451	0.839558	-2.91939	0.00350718	0.0267603	NO
OBSCN	8.53947	-3.80536	1.30348	-2.91939	0.00350718	0.0267603	NO
TMBIM6	106.485	-1.40559	0.48154	-2.91894	0.00351225	0.0267734	NO
EGLN1	28.5987	-2.7805	0.95304	-2.9175	0.00352847	0.0268459	NO
MIA3	6.30208	-3.44648	1.18131	-2.91751	0.0035284	0.0268459	NO
PRDX6	19.7404	-2.4056	0.825016	-2.91582	0.00354755	0.0269654	NO
ATP5MPL	30.5166	-2.25545	0.773717	-2.91509	0.00355586	0.0270029	NO
CAV1	27.949	-2.13384	0.732245	-2.91411	0.00356705	0.0270622	NO
PPP1R14C	3.40324	5.66203	1.94413	2.91237	0.00358695	0.0271874	NO
SMIM7	9.05188	-3.3239	1.14155	-2.91175	0.00359413	0.0272161	NO
TASOR2	5.11707	-3.85524	1.32557	-2.90837	0.00363316	0.0274857	NO
SEMA6B	9.17125	2.50437	0.861325	2.90758	0.00364238	0.0275034	NO
PRDX5	13.0853	-2.47708	0.851853	-2.90787	0.003639	0.0275034	NO
MYH10	5.4283	-2.98736	1.0279	-2.90629	0.00365742	0.027565	NO
COQ4	9.0216	-3.14625	1.08256	-2.9063	0.00365727	0.027565	NO
ROCK1	19.1208	-2.64958	0.911935	-2.90545	0.00366721	0.0276127	NO
CLPTM1L	11.4388	-2.65459	0.91412	-2.90398	0.00368449	0.0277168	NO
KAT6A	14.0084	-2.52112	0.868281	-2.90357	0.00368934	0.0277272	NO
MRC2	1.71071	4.15963	1.43374	2.90124	0.00371684	0.0279077	NO
WDR43	5.45613	-3.58513	1.23592	-2.90078	0.00372239	0.0279231	NO
SULT1C2	2.67212	-3.90376	1.3463	-2.89962	0.00373615	0.0280002	NO
HPS4	41.3693	-2.53636	0.875392	-2.8974	0.00376272	0.028147	NO
FAM174A	4.14781	-4.44309	1.53348	-2.89739	0.00376278	0.028147	NO
C5AR2	11.8969	1.70668	0.589603	2.89462	0.00379616	0.0283692	NO
FLCN	17.7083	-2.10245	0.726402	-2.89434	0.00379958	0.0283692	NO
TBC1D8B	76.6523	1.17141	0.404784	2.89391	0.0038048	0.0283818	NO
AMOTL1	2.70136	4.37941	1.51353	2.89351	0.00380965	0.0283915	NO
CCSER2	3.07705	-2.88648	0.998012	-2.89223	0.00382522	0.028481	NO
PKM	66.2641	-1.50924	0.522547	-2.88823	0.00387415	0.0288185	NO
BPTF	19.2639	-2.84775	0.986117	-2.88784	0.00387891	0.0288191	NO
SLC24A5	18.5943	-3.41891	1.18398	-2.88764	0.00388143	0.0288191	NO
RGCC	4.33088	5.46505	1.89352	2.88619	0.00389935	0.0289135	NO
TAB3	1.98731	3.94428	1.36668	2.88603	0.00390137	0.0289135	NO
ZNF724	3.93976	-3.04323	1.05482	-2.88507	0.00391323	0.0289746	NO
STAU1	10.8732	-3.09238	1.07226	-2.884	0.00392663	0.0290469	NO
ARHGAP45	3.53704	3.88788	1.34839	2.88335	0.00393475	0.0290801	NO
SCP2	40.6988	-2.91298	1.01046	-2.88281	0.00394139	0.0291023	NO
EPS15	22.6349	-2.46777	0.856522	-2.88115	0.00396229	0.0292296	NO
NDUFB1	30.5249	-2.60651	0.905435	-2.87874	0.00399273	0.0294271	NO
ZFP91	14.1297	-2.96816	1.03124	-2.87824	0.00399905	0.0294465	NO
PBX1	2.40307	4.68048	1.62722	2.87636	0.00402287	0.0295947	NO
MRPL45	1.79163	-4.24712	1.47709	-2.87532	0.00403614	0.0296651	NO
STX7	27.2483	-2.3868	0.830664	-2.87336	0.00406129	0.0298226	NO
SNRPG	25.6642	-2.67352	0.9313	-2.87073	0.00409519	0.0300439	NO
NPEPPS	25.6124	-2.13455	0.743937	-2.86926	0.00411427	0.0301563	NO
GPR108	3.15377	-3.66771	1.27865	-2.86842	0.00412527	0.0302092	NO
RPL30	134.413	-1.0746	0.37492	-2.86621	0.00415416	0.0303652	NO
MFSD14A	6.37498	-3.8398	1.3396	-2.86637	0.00415211	0.0303652	NO
CRISPLD2	2.17481	3.99159	1.393	2.86547	0.0041639	0.0304086	NO
EEF1B2	33.0984	-1.79021	0.625017	-2.86427	0.00417976	0.0304689	NO
TRO	5.89699	-3.69186	1.28882	-2.86452	0.00417641	0.0304689	NO
COQ8A	2.33137	-3.91961	1.36932	-2.86246	0.00420366	0.0305873	NO
GRPEL1	3.04527	-4.76775	1.66546	-2.86272	0.00420017	0.0305873	NO
UFM1	18.4135	-3.45859	1.20987	-2.85865	0.0042545	0.0309292	NO
PHKB	6.65057	-3.70103	1.29487	-2.85822	0.0042602	0.0309425	NO
YWHAB	70.7026	-1.53337	0.536746	-2.85679	0.00427943	0.031054	NO
HES6	5.0396	-3.36489	1.17806	-2.8563	0.0042861	0.0310742	NO
BSCL2	5.66512	-3.25658	1.14097	-2.85423	0.00431418	0.0312495	NO
DAPL1	2.7237	4.6945	1.64531	2.85327	0.0043272	0.0312872	NO
ZNF3	5.26173	-2.98122	1.04475	-2.85351	0.00432388	0.0312872	NO
CDV3	35.9858	-2.40558	0.843201	-2.85292	0.00433201	0.0312937	NO
PLXNB1	2.10927	3.614	1.26701	2.85238	0.00433938	0.0313186	NO
SPAST	4.38233	-4.0149	1.40852	-2.85043	0.00436605	0.0314828	NO
RHOBTB1	2.70443	-4.9062	1.72352	-2.84661	0.00441872	0.0318339	NO
EHMT1	18.4338	-2.51264	0.882995	-2.84559	0.00443299	0.031908	NO
NMI	9.27101	-3.91351	1.37561	-2.84491	0.00444233	0.0319465	NO
ATP6V1A	19.5487	-2.56502	0.902254	-2.8429	0.00447051	0.0320926	NO
TNFSF13B	12.9805	-3.9875	1.40262	-2.84289	0.00447067	0.0320926	NO
ANKRD10	22.7105	-2.65709	0.934947	-2.84197	0.00448362	0.0321567	NO
DFFB	1.53686	3.63382	1.27893	2.8413	0.00449305	0.0321955	NO
YIPF4	30.1647	-1.3702	0.482312	-2.8409	0.00449858	0.0322063	NO
VRK3	7.39043	2.41469	0.850201	2.84014	0.00450944	0.0322552	NO
HSBP1	81.1711	-3.45337	1.21684	-2.83797	0.00454009	0.0324455	NO
CCDC186	3.48268	4.12432	1.45684	2.83101	0.00464015	0.0331309	NO
TMSB10	194.106	-0.914202	0.323225	-2.82838	0.00467847	0.0333747	NO
TECPR1	10.5828	-2.86996	1.01538	-2.8265	0.00470601	0.0335413	NO
BAIAP2	5.43572	4.36303	1.54485	2.82424	0.00473929	0.0336589	NO
TINCR	4.66162	2.58069	0.913599	2.82475	0.0047318	0.0336589	NO
RAB4A	5.59705	-4.56053	1.61442	-2.82488	0.00472988	0.0336589	NO
RHOJ	5.13838	-4.60647	1.63105	-2.82424	0.00473932	0.0336589	NO
REXO1L1P	34.2619	2.05697	0.728435	2.82383	0.00474537	0.033672	NO
EHBP1L1	3.05013	3.7437	1.32597	2.82337	0.00475215	0.0336901	NO
STX6	1.52269	4.12889	1.46352	2.8212	0.00478447	0.0338893	NO
EXOSC8	11.4103	-2.93859	1.04195	-2.82029	0.00479804	0.0339553	NO
HELB	13.4983	1.90455	0.675877	2.81789	0.00483405	0.0341735	NO
GLO1	5.43718	-3.65751	1.2982	-2.81738	0.00484168	0.0341735	NO
FBXO3	4.95391	-4.26097	1.51229	-2.81755	0.00483913	0.0341735	NO
ARPC1A	25.6323	-2.05397	0.729243	-2.81657	0.00485391	0.0342297	NO
KIF1C	11.9596	-2.34707	0.83343	-2.81615	0.00486023	0.0342441	NO
PLP1	40.8892	-1.86457	0.662225	-2.81562	0.00486839	0.0342714	NO
CAST	37.41	-2.37551	0.843974	-2.81467	0.00488274	0.0343422	NO
PDCD6IP	17.3885	-2.73864	0.973636	-2.8128	0.00491124	0.0345124	NO
SUCLG1	15.6067	-2.42999	0.864291	-2.81154	0.00493046	0.034617	NO
KIF5B	18.5047	-2.34257	0.833794	-2.80953	0.00496147	0.0348042	NO
CERCAM	12.0618	2.40801	0.858031	2.80644	0.00500929	0.0351089	NO
ARHGAP8	4.7096	4.2438	1.51238	2.80604	0.00501543	0.0351212	NO
SEC14L1	17.7214	-2.68059	0.955966	-2.80406	0.00504638	0.035307	NO
CACTIN	3.45609	3.9774	1.41914	2.80267	0.00506807	0.0354278	NO
MARS1	3.52427	-3.1421	1.12135	-2.80207	0.00507766	0.0354639	NO
TMEM258	22.1346	-2.22541	0.794296	-2.80174	0.00508271	0.0354682	NO
ELMOD1	2.16094	3.59057	1.2823	2.80011	0.00510859	0.0356177	NO
SRRM1	35.7372	-2.29003	0.817921	-2.79982	0.00511317	0.0356186	NO
KCNAB2	21.8306	-2.51131	0.897047	-2.79953	0.00511778	0.0356198	NO
TMEM106B	16.2388	-2.06476	0.738045	-2.7976	0.00514831	0.03577	NO
DGKZ	15.6401	-3.02629	1.08173	-2.79765	0.00514758	0.03577	NO
ALG8	2.91807	-4.4014	1.57414	-2.79606	0.00517296	0.0359101	NO
ERAP2	25.4355	-1.88897	0.676086	-2.79398	0.00520643	0.0361112	NO
KPNA1	5.22672	-4.00024	1.43252	-2.79245	0.00523105	0.0362505	NO
BUD23	10.4844	-2.37378	0.850521	-2.79097	0.00525509	0.0363856	NO
BACH1	10.7891	-5.55295	1.991	-2.78902	0.00528675	0.0365732	NO
SDC4	4.61781	2.70707	0.970821	2.78843	0.00529637	0.0366081	NO
SFXN2	4.02771	3.38254	1.21389	2.78653	0.00532764	0.0367411	NO
IAH1	23.6204	-2.23135	0.800955	-2.78586	0.00533857	0.0367411	NO
EIF3M	17.5108	-2.45378	0.880733	-2.78607	0.00533513	0.0367411	NO
C11orf98	3.19681	-3.75974	1.34949	-2.78605	0.00533546	0.0367411	NO
ESCO1	9.67714	-3.7766	1.35554	-2.78606	0.00533531	0.0367411	NO
CRTAP	44.0718	-2.30943	0.829393	-2.78448	0.00536142	0.0368667	NO
PLEKHO2	3.06751	-3.29512	1.18381	-2.78348	0.00537794	0.0369485	NO
TRMT112	35.3779	-2.09095	0.751723	-2.78154	0.00541019	0.0371382	NO
SHMT1	10.4787	-2.70246	0.971815	-2.78084	0.0054218	0.0371542	NO
FBXW11	6.70852	-3.50588	1.26061	-2.78111	0.00541737	0.0371542	NO
UBAP1	9.59538	-3.90592	1.40569	-2.77865	0.00545857	0.0373742	NO
COPS9	13.8936	-2.55971	0.921359	-2.77819	0.0054662	0.0373944	NO
HSPA5	34.0725	-1.98064	0.713293	-2.77675	0.00549049	0.0375285	NO
MTND1P23	163.189	-0.947698	0.341339	-2.77641	0.00549627	0.0375359	NO
SYVN1	14.3499	-3.09982	1.11688	-2.77543	0.00551294	0.0376177	NO
DUSP6	27.6191	-2.21861	0.800445	-2.77172	0.00557613	0.0379196	NO
NEDD8	27.4215	-2.41806	0.872248	-2.77221	0.00556766	0.0379196	NO
HELLS	3.20591	-3.13917	1.13228	-2.77243	0.00556398	0.0379196	NO
NBPF8	1.82926	-3.62121	1.30647	-2.77174	0.00557569	0.0379196	NO
SCARB1	17.3535	-2.17044	0.783196	-2.77126	0.00558402	0.037941	NO
RBM39	37.6176	-1.96834	0.710455	-2.77053	0.00559653	0.0379938	NO
RNASE1	13.3242	-3.13813	1.13286	-2.77009	0.00560404	0.0380103	NO
FOXK2	7.38442	-3.65427	1.31931	-2.76984	0.00560847	0.0380103	NO
MORF4L1	38.5798	-1.56327	0.564542	-2.76909	0.00562128	0.0380346	NO
C12orf49	12.6706	-2.8401	1.02565	-2.76908	0.00562156	0.0380346	NO
FDPS	11.988	-2.80909	1.01477	-2.76821	0.00563644	0.038071	NO
CLMN	11.3883	-4.41233	1.59383	-2.76839	0.00563347	0.038071	NO
PROM2	5.02712	4.72052	1.70644	2.76629	0.00566973	0.038242	NO
ACTR3B	2.6081	3.41852	1.23594	2.76593	0.0056761	0.038242	NO
RHOQ	22.5936	-2.41972	0.874803	-2.76602	0.00567453	0.038242	NO
NSUN5	4.02307	-3.71531	1.34353	-2.76534	0.0056864	0.0382792	NO
RBM25	50.5037	-2.08587	0.754526	-2.76447	0.00570155	0.0383489	NO
LPCAT1	2.61022	-4.00632	1.4497	-2.76354	0.00571774	0.0384255	NO
ITPKB	23.623	-2.14561	0.776929	-2.76166	0.00575081	0.0386128	NO
DR1	14.5704	-2.27633	0.824338	-2.76141	0.00575526	0.0386128	NO
DDX19A	16.2263	-2.56382	0.928797	-2.76037	0.0057736	0.0387034	NO
RPL4	147.617	-1.23113	0.446184	-2.75925	0.00579346	0.0387854	NO
SMARCA5	8.49725	-3.17758	1.15182	-2.75873	0.00580257	0.0387854	NO
ZHX1	8.25275	-3.30884	1.1994	-2.75876	0.00580216	0.0387854	NO
SHPK	1.47638	-4.02368	1.4586	-2.75859	0.00580521	0.0387854	NO
PCOLCE	3.76335	-3.94924	1.43229	-2.75728	0.00582846	0.0388758	NO
USP18	4.71357	-4.50362	1.63324	-2.75749	0.00582476	0.0388758	NO
ATAD3C	1.26899	2.89941	1.05202	2.75605	0.00585049	0.0389902	NO
HSPH1	10.3064	-3.59348	1.30495	-2.75373	0.00589207	0.0392347	NO
FAM199X	6.94423	-4.54573	1.65092	-2.75345	0.00589716	0.039236	NO
VPS13C	33.4671	-2.74115	0.995815	-2.75267	0.00591121	0.0392968	NO
SELENOK	10.1178	-2.94812	1.07161	-2.75112	0.00593924	0.0394504	NO
ZSWIM6	3.73099	-3.87321	1.40912	-2.74867	0.00598376	0.0397131	NO
PYGL	23.5503	-2.42396	0.882529	-2.7466	0.00602159	0.0399311	NO
RPL9	83.9041	-1.38655	0.504887	-2.74626	0.00602793	0.0399348	NO
TMEM128	6.74651	-3.36396	1.22503	-2.74603	0.00603213	0.0399348	NO
CHP1	27.3159	-1.75552	0.640181	-2.74222	0.00610252	0.0403674	NO
MRPL48	3.37331	-2.82807	1.03198	-2.74044	0.00613569	0.0405198	NO
PGAP6	1.27296	-3.14217	1.1465	-2.74065	0.00613174	0.0405198	NO
BCL2A1	7.89035	-3.27686	1.19698	-2.73761	0.00618881	0.040837	NO
TRIOBP	11.9797	-3.24073	1.18415	-2.73676	0.00620476	0.0409085	NO
HMGN2	38.4443	-1.61078	0.588814	-2.73563	0.00622605	0.0410151	NO
HSPB2	1.98391	-4.76858	1.74522	-2.73236	0.00628828	0.0413909	NO
MAL2	2.49443	5.17786	1.89557	2.73156	0.00630351	0.0414571	NO
SAMD9L	9.22824	-3.80498	1.3935	-2.73051	0.00632358	0.041555	NO
TMEM170A	2.47725	2.8681	1.05095	2.72905	0.00635163	0.0416026	NO
SPECC1	18.0722	2.51632	0.921965	2.7293	0.00634696	0.0416026	NO
SLC39A9	6.46858	-3.3443	1.2254	-2.72915	0.00634976	0.0416026	NO
ZDHHC17	5.83863	-3.87397	1.41944	-2.72924	0.0063481	0.0416026	NO
YBX1	93.8055	-1.47902	0.542071	-2.72846	0.00636309	0.0416437	NO
TMED5	10.5902	-2.68276	0.98368	-2.72727	0.00638602	0.0417596	NO
C20orf144	1.61948	4.49522	1.64888	2.72622	0.00640637	0.0418584	NO
USP14	12.2343	-2.82485	1.03629	-2.72593	0.00641197	0.0418609	NO
ADCY7	9.7389	3.84401	1.41116	2.72401	0.00644946	0.0420459	NO
MFSD1	22.5314	-3.04474	1.11777	-2.72394	0.00645081	0.0420459	NO
UGT8	3.4922	2.99984	1.10203	2.72211	0.00648669	0.0422453	NO
VEZT	5.76489	2.98037	1.09554	2.72046	0.00651914	0.0423895	NO
RALGAPB	6.24457	-3.58131	1.31644	-2.72044	0.00651942	0.0423895	NO
CSRP1	18.8177	-2.11122	0.776185	-2.71999	0.00652834	0.042413	NO
PRCP	29.4506	-3.20049	1.17696	-2.71929	0.00654229	0.0424691	NO
FAT1	8.71123	-3.20679	1.17946	-2.71887	0.00655045	0.0424877	NO
CLU	8.88831	-2.62542	0.966003	-2.71781	0.00657146	0.042584	NO
PAIP1	18.2138	-2.89015	1.0635	-2.71759	0.00657594	0.042584	NO
TVP23C	2.30785	3.39724	1.25046	2.7168	0.00659164	0.0426167	NO
ACTN1	37.395	-2.3238	0.855274	-2.71703	0.00658711	0.0426167	NO
PPL	2.41272	5.13116	1.88908	2.71622	0.00660324	0.0426228	NO
GLG1	26.6968	-1.91151	0.703675	-2.71646	0.00659838	0.0426228	NO
SH3RF2	3.20108	4.69299	1.72794	2.71594	0.00660872	0.0426239	NO
RASAL2	4.93474	3.42127	1.26031	2.71463	0.006635	0.0427589	NO
GNAQ	14.931	-2.57697	0.949579	-2.7138	0.00665162	0.0428315	NO
NHSL2	2.19229	4.37976	1.61463	2.71254	0.00667697	0.0429602	NO
BMPR1A	6.65062	1.95925	0.722604	2.71137	0.00670053	0.0430771	NO
NOMO2	18.2747	-2.71115	1.0001	-2.71089	0.00671032	0.0431055	NO
ILVBL	7.37458	-2.89444	1.06805	-2.71001	0.00672808	0.0431849	NO
MAP4K1	6.47821	3.38527	1.24939	2.70954	0.00673772	0.0432121	NO
MGST1	12.1527	-3.08631	1.13954	-2.70838	0.00676135	0.0433289	NO
SP100	867.416	0.330275	0.121971	2.70783	0.00677257	0.0433661	NO
JMJD8	5.99745	-2.9132	1.07634	-2.70657	0.00679828	0.043496	NO
VSTM4	8.72535	2.5679	0.949885	2.70338	0.00686382	0.0438452	NO
GDPGP1	1.74588	-3.29424	1.21846	-2.70361	0.00685901	0.0438452	NO
RACK1	54.8074	-1.30667	0.483465	-2.70271	0.00687766	0.0438986	NO
SLAMF7	9.13647	-3.16487	1.1712	-2.70225	0.00688723	0.0439246	NO
MXRA5	6.45786	3.88073	1.43667	2.70119	0.00690909	0.0440289	NO
HES1	15.8832	3.10823	1.15085	2.70081	0.00691709	0.0440448	NO
FAM177A1	63.8996	-2.10055	0.77798	-2.70001	0.00693373	0.0441066	NO
DAPK1	11.8828	-2.7482	1.01792	-2.69982	0.0069378	0.0441066	NO
CCT2	15.1007	-2.72122	1.0082	-2.6991	0.00695274	0.0441664	NO
STXBP1	2.66554	-4.27259	1.58318	-2.69873	0.00696038	0.0441799	NO
LIPA	25.7719	-2.92411	1.08437	-2.69659	0.00700542	0.0444305	NO
UPK3BL1	8.93499	-2.76515	1.02571	-2.69585	0.00702087	0.0444581	NO
MRPL38	4.50497	-3.62649	1.34516	-2.69595	0.00701887	0.0444581	NO
MTRNR2L8	17.5137	-1.78382	0.661917	-2.69493	0.00704025	0.0445456	NO
ST3GAL2	10.1471	1.99785	0.74157	2.69408	0.00705833	0.0446247	NO
ERBB3	45.6796	-1.77388	0.658602	-2.69341	0.00707262	0.0446797	NO
VAMP2	12.0125	-2.46562	0.915713	-2.69257	0.00709042	0.0447569	NO
PCDH11Y	4.08488	-2.13717	0.794129	-2.69121	0.00711932	0.0449039	NO
ZC3HAV1	11.8866	-2.47299	0.919312	-2.69004	0.00714435	0.0450263	NO
CRYL1	5.06706	-3.77875	1.40493	-2.68963	0.00715322	0.0450467	NO
RRAGC	8.78909	-2.83687	1.0552	-2.68847	0.00717794	0.0451669	NO
ITGA1	2.04759	-3.07682	1.14496	-2.68728	0.0072037	0.0452933	NO
MTRNR2L4	1.6905	3.12223	1.162	2.68693	0.00721111	0.0453043	NO
RPS10	17.7209	-2.48671	0.925697	-2.68631	0.00722463	0.0453537	NO
ARL6IP5	19.0632	-2.41459	0.899815	-2.68343	0.00728722	0.0457107	NO
TECR	9.43992	3.50777	1.3078	2.6822	0.00731401	0.0457712	NO
MDH2	18.3339	-2.60502	0.971177	-2.68233	0.00731107	0.0457712	NO
LGALS8	17.721	-2.8383	1.0581	-2.68246	0.00730836	0.0457712	NO
HMG20B	15.2855	1.97595	0.736886	2.68149	0.00732941	0.0458317	NO
LAMP2	47.1461	-1.93878	0.723189	-2.68088	0.00734283	0.0458798	NO
VLDLR	5.28492	-3.7013	1.38077	-2.68062	0.00734867	0.0458805	NO
VDAC1	18.3676	-1.65738	0.61836	-2.68029	0.00735592	0.0458899	NO
MORN2	4.28403	-4.12303	1.53863	-2.67967	0.00736943	0.0459384	NO
SREBF2	3.23125	-2.69327	1.00538	-2.67885	0.00738761	0.0460159	NO
EMC3	5.30949	-2.87052	1.07178	-2.67827	0.00740039	0.0460597	NO
LITAF	28.9236	-2.10484	0.786056	-2.67773	0.0074123	0.0460652	NO
AKAP12	11.2102	-2.87525	1.07377	-2.67771	0.00741279	0.0460652	NO
ZDHHC3	5.45574	3.62048	1.35238	2.67712	0.0074257	0.0460739	NO
RNF19B	5.41779	-3.12659	1.16781	-2.67731	0.00742158	0.0460739	NO
TATDN1	2.40544	-3.74269	1.39892	-2.67542	0.00746366	0.0462736	NO
SERPINA1	4.38526	-3.17562	1.18769	-2.67378	0.0075001	0.0464635	NO
NEMF	16.5159	-2.4354	0.91096	-2.67344	0.00750769	0.0464745	NO
ETS2	5.81688	2.96523	1.10938	2.67288	0.00752039	0.0465052	NO
SLC52A1	2.11069	2.40548	0.900048	2.67261	0.00752639	0.0465052	NO
FADS2	6.85685	-2.70288	1.01139	-2.67244	0.00753008	0.0465052	NO
SBNO2	2.22317	3.91161	1.46401	2.67185	0.00754342	0.0465517	NO
DAZAP1	11.0911	-2.82403	1.05762	-2.67018	0.00758109	0.0467481	NO
CASZ1	4.42601	5.23714	1.96206	2.66921	0.007603	0.0467514	NO
WTAP	23.0824	-1.94126	0.727301	-2.66912	0.00760499	0.0467514	NO
LY6E	12.9711	-3.04167	1.13927	-2.66984	0.00758868	0.0467514	NO
PER3	5.01223	-4.00779	1.50128	-2.66959	0.00759441	0.0467514	NO
TMA16	2.38632	-4.32398	1.62041	-2.66845	0.00762021	0.046809	NO
SLC24A4	3.15517	3.0774	1.15353	2.66781	0.00763465	0.0468618	NO
CFL2	4.39285	-3.33244	1.24952	-2.66698	0.00765367	0.0469425	NO
ERBB2	5.58882	3.10395	1.16435	2.66581	0.00768021	0.0470692	NO
OCIAD1	41.7512	-1.98358	0.74418	-2.66546	0.00768829	0.0470827	NO
VPS41	9.74452	-3.55008	1.33349	-2.66225	0.00776213	0.0474986	NO
NDUFA11	7.95831	-2.44798	0.919663	-2.66182	0.00777197	0.0475224	NO
UCP2	9.70526	3.23838	1.21686	2.66127	0.00778475	0.0475643	NO
WASL	13.3033	-3.39235	1.27563	-2.65935	0.00782919	0.0477993	NO
SEC24C	7.81741	-2.7664	1.04072	-2.65816	0.00785697	0.0479323	NO
ABCB11	3.74438	2.38484	0.897425	2.65743	0.00787395	0.0479993	NO
H1-0	11.1297	-2.51098	0.947356	-2.65051	0.00803707	0.0489564	NO
SHISA5	17.0219	-1.88446	0.711297	-2.64933	0.00806509	0.0490483	NO
EIF3B	9.59367	-2.70414	1.0206	-2.64957	0.00805953	0.0490483	NO
PATL1	18.7632	-3.24029	1.22316	-2.6491	0.00807054	0.0490483	NO
TRAPPC1	4.78428	-2.76039	1.04232	-2.64832	0.00808924	0.0491246	NO
NONO	37.7163	-1.82838	0.690854	-2.64655	0.00813184	0.049333	NO
FNBP1	4.7318	-2.93265	1.10819	-2.64635	0.00813662	0.049333	NO
ARMCX2	1.56229	-4.03933	1.52651	-2.64612	0.00814205	0.049333	NO
SEH1L	15.027	-1.97329	0.746326	-2.644	0.00819316	0.0496052	NO
SMPD4BP	9.25385	-3.26409	1.23486	-2.64328	0.0082107	0.0496738	NO
OPRM1	5.04142	2.40091	0.908778	2.64192	0.00824386	0.0498285	NO
FAM91A1	29.6119	-3.01168	1.14005	-2.64172	0.00824871	0.0498285	NO
ENOPH1	4.61291	-3.62049	1.37077	-2.6412	0.00826121	0.0498663	NO
DDB2	14.3258	-2.39723	0.907739	-2.64088	0.00826907	0.0498761	NO
SUCO	6.20479	-4.48539	1.70047	-2.63774	0.0083461	0.0503029	NO
MIA2	2.452	3.87449	1.46927	2.63702	0.00836372	0.0503222	NO
RAP1B	75.2444	-2.08354	0.790044	-2.63724	0.0083584	0.0503222	NO
HEATR3	2.52045	-3.30479	1.25331	-2.63684	0.00836817	0.0503222	NO
TRA2B	34.0052	-2.43659	0.924495	-2.63559	0.00839915	0.0504428	NO
DENR	6.85929	-2.73313	1.03704	-2.63552	0.00840084	0.0504428	NO
SRSF9	19.4245	-2.28025	0.865528	-2.63453	0.00842549	0.050553	NO
GAS2L1	2.68284	5.27923	2.00427	2.634	0.00843863	0.050556	NO
DUT	42.556	-2.14093	0.812786	-2.63407	0.00843678	0.050556	NO
HTT	4.23791	-3.27928	1.24531	-2.6333	0.00845606	0.0506225	NO
ARHGEF4	2.25498	4.27884	1.62514	2.6329	0.00846594	0.0506438	NO
ECHS1	2.00427	-3.18091	1.20834	-2.63246	0.0084768	0.0506709	NO
RXRA	3.07622	3.33943	1.26882	2.63192	0.00849035	0.0506762	NO
CDC34	2.66578	-4.12464	1.56701	-2.63217	0.00848414	0.0506762	NO
ALKBH7	2.80464	-4.07242	1.54784	-2.63103	0.00851276	0.0507721	NO
MRTO4	2.81191	-3.1632	1.20357	-2.62817	0.00858455	0.0511622	NO
MPDZ	6.76715	-4.12182	1.56892	-2.62717	0.00860981	0.0512745	NO
USF2	17.4832	-1.78679	0.68033	-2.62635	0.00863053	0.0512872	NO
UNK	7.47128	-2.36866	0.901976	-2.62608	0.00863758	0.0512872	NO
QPRT	11.3484	-2.88825	1.09957	-2.62672	0.00862123	0.0512872	NO
MRPL16	8.52537	-3.09673	1.17918	-2.62616	0.00863535	0.0512872	NO
ACTG1P17	3.18122	2.44925	0.933022	2.62507	0.00866301	0.0513621	NO
FAM241A	118.217	0.995597	0.379245	2.62521	0.00865964	0.0513621	NO
IPO9	39.5863	-2.48975	0.948618	-2.6246	0.00867496	0.0513948	NO
HLA-DPA1	6.45047	-5.35237	2.04074	-2.62276	0.00872216	0.0516362	NO
MPI	16.1005	-3.17489	1.21079	-2.62215	0.0087377	0.05169	NO
PITPNB	7.40615	-2.53423	0.967535	-2.61927	0.00881189	0.0520519	NO
IL10RA	9.51513	-3.25315	1.24197	-2.61935	0.00880962	0.0520519	NO
PARD6G	7.17687	2.2408	0.857046	2.61457	0.00893411	0.052735	NO
ERN1	4.02692	3.0717	1.17545	2.61321	0.00896958	0.0529053	NO
HERC1	4.00318	-2.75227	1.05343	-2.61268	0.0089835	0.0529484	NO
GSPT1	7.48795	-2.7038	1.03517	-2.61194	0.009003	0.0530243	NO
UBE2V1	20.8987	-2.4219	0.927918	-2.61003	0.00905332	0.0532815	NO
PIP4K2A	14.9859	-3.0417	1.16575	-2.60921	0.00907507	0.053331	NO
DNAJC19	3.38549	-4.8878	1.87319	-2.60934	0.00907162	0.053331	NO
TAX1BP1	20.6893	-2.12046	0.812892	-2.60854	0.00909285	0.0533963	NO
PFDN2	10.7102	-2.66033	1.02113	-2.60527	0.00918025	0.0538392	NO
NUP88	6.07072	-2.95025	1.13244	-2.60521	0.00918173	0.0538392	NO
NDUFA7	9.51564	-2.76117	1.05998	-2.60494	0.00918903	0.0538426	NO
FNDC3A	6.53851	-3.43309	1.31823	-2.60432	0.00920575	0.0539011	NO
POLR2C	3.33048	-3.21851	1.23653	-2.60285	0.00924531	0.0540142	NO
MEX3C	2.53809	-4.09236	1.57215	-2.60304	0.00924019	0.0540142	NO
URGCP	2.44072	-4.41286	1.69509	-2.60332	0.00923247	0.0540142	NO
IQCN	1.75995	3.26373	1.25438	2.60188	0.00927144	0.0540884	NO
PCMT1	10.3921	-3.13653	1.20549	-2.60188	0.00927153	0.0540884	NO
CEP170B	2.20183	3.02269	1.16208	2.6011	0.00929258	0.0541718	NO
CAP1	18.9128	-1.83328	0.705028	-2.6003	0.00931422	0.0542584	NO
GAL3ST4	2.68038	2.5492	0.98093	2.59876	0.0093561	0.0544414	NO
KLF6	166.852	1.66257	0.639846	2.5984	0.00936604	0.0544414	NO
BCAP29	5.09363	-2.62402	1.00981	-2.59853	0.00936229	0.0544414	NO
HOOK3	8.78975	-1.63968	0.631115	-2.59807	0.00937481	0.0544528	NO
SMARCAL1	2.14406	-2.93284	1.12897	-2.59779	0.00938257	0.0544583	NO
CERS2	19.2995	-2.28026	0.877912	-2.59736	0.00939427	0.0544868	NO
EED	1.75245	-3.63188	1.39878	-2.59646	0.00941888	0.0545899	NO
ZNF26	15.5985	-1.45482	0.560569	-2.59525	0.00945224	0.0547041	NO
GLI3	14.1675	-2.88794	1.11271	-2.59541	0.00944789	0.0547041	NO
RGS2	3.13749	3.97626	1.53272	2.59425	0.00947982	0.054824	NO
TTL	9.00898	2.37485	0.915921	2.59285	0.00951832	0.0549803	NO
ZC3H12C	1.9271	-4.02297	1.55161	-2.59277	0.00952058	0.0549803	NO
CD151	8.62229	-2.17912	0.840805	-2.5917	0.0095502	0.0551116	NO
CASP14	3.83782	3.8745	1.49567	2.59048	0.00958426	0.0552683	NO
IL20RB	2.47256	5.20092	2.00815	2.5899	0.00960027	0.0553208	NO
PPP1R12A	33.2852	3.36024	1.29808	2.58863	0.00963583	0.0554858	NO
RASGEF1B	2.21238	3.84391	1.48583	2.58704	0.00968034	0.055702	NO
BNIP2	15.7428	-2.67837	1.03598	-2.58536	0.00972779	0.0559348	NO
GOLGA7	12.8002	-2.63528	1.01961	-2.58458	0.00974966	0.05594	NO
PTAR1	9.23692	-3.51265	1.359	-2.58473	0.00974547	0.05594	NO
TMEM53	2.09568	-4.67726	1.80962	-2.58467	0.00974735	0.05594	NO
RTKN	1.33438	-3.53921	1.36968	-2.58397	0.0097671	0.0559999	NO
TCHP	1.3963	-3.12063	1.2079	-2.58353	0.00977961	0.0560315	NO
HTRA1	3.10613	4.93827	1.912	2.58278	0.00980079	0.0561127	NO
ETV4	1.81216	-4.39458	1.70184	-2.58225	0.00981584	0.0561587	NO
RNF138	2.59222	4.68666	1.81611	2.5806	0.00986295	0.0563673	NO
HERC4	13.6244	-1.68507	0.653006	-2.58048	0.00986639	0.0563673	NO
USP21	3.34687	4.67564	1.81253	2.57962	0.00989095	0.0564673	NO
SH3D21	7.94844	-2.9072	1.1271	-2.57936	0.00989825	0.0564687	NO
P4HB	37.5547	-1.38224	0.536104	-2.57832	0.00992834	0.0565731	NO
PPT2	2.74728	-3.91891	1.52	-2.57823	0.00993068	0.0565731	NO
DMAC2L	16.4284	-3.03527	1.17785	-2.57695	0.0099676	0.0566624	NO
SPART	8.05126	-3.24062	1.25747	-2.5771	0.00996336	0.0566624	NO
GCA	4.16146	-3.91325	1.51848	-2.57709	0.00996368	0.0566624	NO
NCBP2	10.477	-2.86393	1.11172	-2.57614	0.00999116	0.056756	NO
ZFAND2B	3.16845	6.13816	2.38307	2.57574	0.0100025	0.0567804	NO
POLR2L	18.0552	-2.0867	0.810266	-2.57533	0.0100144	0.0568075	NO
ZNF605	6.82262	2.47053	0.959432	2.575	0.0100241	0.0568223	NO
GRAMD1A	4.01734	-3.05559	1.18696	-2.5743	0.0100443	0.0568966	NO
MAX	8.15659	-2.68639	1.0437	-2.57391	0.0100556	0.0569204	NO
WBP2	32.442	-1.94709	0.756751	-2.57295	0.0100834	0.0570022	NO
EIF1AY	25.8161	-3.04483	1.18341	-2.57292	0.0100843	0.0570022	NO
ZNF548	1.92359	-2.87906	1.11943	-2.5719	0.0101142	0.0571307	NO
MAPK13	9.08161	2.18628	0.850351	2.57103	0.0101396	0.0571934	NO
PEX26	61.1536	1.64834	0.641104	2.57109	0.0101379	0.0571934	NO
TGFBRAP1	10.9466	-2.17081	0.84471	-2.56989	0.0101731	0.0573422	NO
CCNK	5.58568	-3.03652	1.18179	-2.56942	0.0101868	0.0573788	NO
ZNF791	9.52081	-1.98725	0.773643	-2.56869	0.0102085	0.0574606	NO
RPL41	196.138	-0.888511	0.345956	-2.56828	0.0102205	0.0574874	NO
TRPC4AP	3.19709	-2.9059	1.1322	-2.56659	0.0102703	0.0576869	NO
FZD6	7.14634	-4.06135	1.58227	-2.56678	0.0102648	0.0576869	NO
GJB6	1.87446	4.68621	1.8267	2.56541	0.0103055	0.0578034	NO
DNAH7	1.81273	-4.01011	1.5631	-2.56548	0.0103032	0.0578034	NO
RNF166	4.78986	3.57946	1.39583	2.5644	0.0103354	0.0579306	NO
CTSS	39.0224	-1.85274	0.722836	-2.56315	0.0103727	0.0580578	NO
IST1	23.3008	-2.40148	0.936902	-2.56321	0.0103708	0.0580578	NO
CYP46A1	5.24055	2.75639	1.07628	2.56102	0.0104364	0.0583741	NO
CDCA7L	3.32093	-3.96132	1.54752	-2.55978	0.0104739	0.0585427	NO
EREG	1.86899	2.47131	0.966213	2.55773	0.0105358	0.0588476	NO
VAV3	5.92896	-3.16842	1.23896	-2.55733	0.010548	0.0588748	NO
MTDH	29.439	-2.09736	0.820372	-2.5566	0.0105701	0.0589015	NO
ATRAID	5.12675	-3.13148	1.22494	-2.55644	0.0105749	0.0589015	NO
MRPS18C	13.0682	-3.35122	1.31085	-2.55653	0.0105721	0.0589015	NO
PGGHG	2.78437	4.39981	1.7218	2.55536	0.0106077	0.0590429	NO
HNRNPA1	114.052	-1.09229	0.427613	-2.5544	0.0106371	0.0591657	NO
NBPF15	1.30644	-3.35355	1.31378	-2.55261	0.010692	0.0594298	NO
C7orf50	1.58645	-3.2833	1.28673	-2.55166	0.0107211	0.0595501	NO
JMJD1C	3.94249	3.85005	1.50927	2.55093	0.0107436	0.0596339	NO
FSTL1	32.2011	-2.40778	0.94432	-2.54975	0.01078	0.0597945	NO
GPC1	3.26046	5.52367	2.1677	2.54817	0.010829	0.059983	NO
DIP2C	6.44921	-3.1587	1.23954	-2.54828	0.0108255	0.059983	NO
RPL21	90.6251	-0.96338	0.378586	-2.54468	0.0109378	0.0605436	NO
DNTTIP2	25.2876	2.15877	0.848787	2.54335	0.0109794	0.0606683	NO
TMSB4XP4	7.0662	1.29842	0.510537	2.54324	0.0109831	0.0606683	NO
TBC1D24	7.78134	-2.27929	0.896109	-2.54355	0.0109733	0.0606683	NO
NDUFC2	47.3312	-1.85865	0.730943	-2.54281	0.0109964	0.0607002	NO
C11orf24	6.65071	-3.36601	1.32389	-2.54251	0.011006	0.0607114	NO
ABCC9	29.6264	1.53291	0.603049	2.54194	0.0110238	0.0607678	NO
PNPT1	19.4339	-1.50746	0.593188	-2.54129	0.0110444	0.0608392	NO
NUDT3	14.5625	-2.05602	0.809469	-2.53997	0.0110863	0.0610282	NO
CNR2	5.371	2.21748	0.873598	2.53833	0.0111383	0.0612588	NO
EMC7	11.8845	-2.34858	0.925305	-2.53817	0.0111435	0.0612588	NO
IFI44	23.864	-2.41761	0.953077	-2.53664	0.0111923	0.0614845	NO
POLR2K	21.0369	-2.83608	1.11838	-2.53588	0.0112165	0.061533	NO
FAM214A	8.81217	-3.24025	1.27772	-2.53597	0.0112137	0.061533	NO
DDX42	14.1441	-2.93619	1.1581	-2.53535	0.0112335	0.0615845	NO
ARHGAP9	6.6806	4.00302	1.58028	2.5331	0.0113057	0.0619377	NO
SSU72	12.6864	-2.04503	0.807546	-2.5324	0.0113285	0.0620103	NO
PHF20L1	9.25859	-2.76578	1.09224	-2.53221	0.0113345	0.0620103	NO
PDCD2	24.6854	-3.85176	1.52149	-2.53157	0.0113554	0.0620827	NO
EID1	25.4907	-2.20988	0.87318	-2.53084	0.0113791	0.0621693	NO
MARCKS	42.1525	-1.64738	0.651103	-2.53014	0.0114016	0.0622497	NO
TUBGCP6	14.8997	-2.64901	1.04713	-2.52979	0.0114132	0.0622707	NO
RNASEK	23.7036	-1.88058	0.743579	-2.52909	0.0114357	0.0623267	NO
PELP1	16.3044	-2.62857	1.03938	-2.52898	0.0114394	0.0623267	NO
DCTD	16.0294	-3.18045	1.25771	-2.52875	0.0114468	0.0623267	NO
NDUFS6	1.48504	-3.0194	1.19441	-2.52795	0.0114731	0.0624276	NO
MIDN	7.99178	2.09596	0.829555	2.52661	0.0115171	0.062624	NO
UBQLN1	19.6213	-2.80291	1.10954	-2.5262	0.0115303	0.0626535	NO
PPP2R5A	22.6468	-2.74168	1.08591	-2.52479	0.0115769	0.0628639	NO
PRPF38A	2.0383	2.8113	1.11379	2.52409	0.0115999	0.0629461	NO
TCP1	17.3507	-2.6312	1.04273	-2.52338	0.0116234	0.0630307	NO
XPO1	19.3639	-2.17491	0.862048	-2.52296	0.0116373	0.0630636	NO
AQP1	4.57472	4.85822	1.92667	2.52157	0.0116833	0.0632274	NO
FH	2.93682	-3.32218	1.31743	-2.52172	0.0116784	0.0632274	NO
NDUFAB1	14.3869	-2.50014	0.991985	-2.52034	0.011724	0.0634047	NO
EPB41L2	10.0221	-3.2618	1.29459	-2.51957	0.0117497	0.0635007	NO
GGT5	2.25139	3.5495	1.4095	2.51827	0.0117932	0.0636926	NO
KCNJ6	5.47008	1.84878	0.734304	2.51774	0.0118112	0.0637469	NO
OR10H1	1.63517	-3.58209	1.42504	-2.51368	0.0119479	0.0644412	NO
PACSIN3	2.73228	-3.76593	1.49841	-2.51329	0.0119612	0.0644697	NO
RPL37A	232.124	-0.886252	0.353017	-2.51051	0.0120557	0.0649355	NO
SERPINB13	2.80784	5.37445	2.14218	2.50887	0.0121118	0.0651059	NO
NABP1	10.6832	1.47044	0.586049	2.50908	0.0121048	0.0651059	NO
ZNF761	2.16327	-2.96947	1.18337	-2.50934	0.0120959	0.0651059	NO
GOLGA8B	7.2981	-3.29142	1.31226	-2.50821	0.0121345	0.0651843	NO
SNRNP70	49.923	-1.46082	0.582471	-2.50797	0.0121427	0.0651848	NO
TMEM212	27.469	1.41303	0.563475	2.5077	0.012152	0.0651907	NO
ADPRHL1	2.39406	2.81856	1.12503	2.50532	0.0122341	0.0654801	NO
WSB1	69.4241	-1.42039	0.56682	-2.50589	0.0122143	0.0654801	NO
MCFD2	11.6547	-2.13793	0.853483	-2.50495	0.0122468	0.0654801	NO
TIAL1	34.9974	-2.14216	0.855158	-2.50499	0.0122456	0.0654801	NO
RNF14	8.05094	-2.21857	0.885647	-2.50503	0.0122441	0.0654801	NO
RHNO1	4.2807	-3.26988	1.3056	-2.50451	0.0122621	0.0655177	NO
MTAP	5.04919	2.39327	0.956379	2.50243	0.0123345	0.0658609	NO
DIPK1A	1.74084	-4.19327	1.67772	-2.49939	0.0124407	0.0663837	NO
STK32A	14.2212	-2.87151	1.14909	-2.49894	0.0124564	0.0664233	NO
MRPL34	9.63983	-2.98601	1.19547	-2.49777	0.0124978	0.0665993	NO
PAK6	1.82293	4.45042	1.78282	2.49629	0.0125501	0.0667003	NO
ARPC5	70.736	1.64293	0.658091	2.4965	0.0125424	0.0667003	NO
SEPTIN9	34.9423	-1.51862	0.608333	-2.49636	0.0125474	0.0667003	NO
ZNF585A	2.15916	-3.3889	1.35724	-2.4969	0.0125283	0.0667003	NO
TPM3	33.1193	-1.4691	0.589143	-2.49362	0.0126447	0.0671141	NO
TMEM192	19.8102	-1.64123	0.65815	-2.4937	0.0126419	0.0671141	NO
ACAA2	11.5875	-2.48541	0.996889	-2.49316	0.012661	0.0671562	NO
LGALS7B	2.15395	5.00124	2.00692	2.492	0.0127028	0.0671874	NO
GJC1	3.09214	2.70584	1.08561	2.49247	0.0126859	0.0671874	NO
PGK1	41.8502	-1.95076	0.782687	-2.49239	0.0126888	0.0671874	NO
TM9SF3	41.8186	-2.32474	0.932783	-2.49226	0.0126932	0.0671874	NO
CHMP4A	1.60049	-2.9444	1.18162	-2.49182	0.0127089	0.0671874	NO
TUBA1B	100.8	-1.19318	0.478982	-2.49107	0.012736	0.0672422	NO
RAB7A	41.3742	-1.79259	0.719543	-2.49129	0.0127282	0.0672422	NO
MT1X	20.7659	2.10515	0.846474	2.48696	0.0128839	0.0679778	NO
PRKCSH	18.0606	-2.01318	0.809609	-2.4866	0.0128969	0.068002	NO
PTBP3	9.08266	3.12598	1.25742	2.48603	0.0129179	0.0680227	NO
ABCF3	2.32206	-3.41064	1.3719	-2.48607	0.0129161	0.0680227	NO
KLHL36	2.9292	3.85945	1.55329	2.4847	0.0129661	0.0682321	NO
SLC6A17	2.29652	5.02729	2.02441	2.48333	0.0130159	0.068359	NO
CCNDBP1	29.2431	-1.53355	0.61748	-2.48357	0.0130074	0.068359	NO
NDUFB8	12.1087	-1.93022	0.77717	-2.48365	0.0130043	0.068359	NO
CD24	4.82932	2.62944	1.05928	2.48228	0.0130545	0.0685166	NO
IGF1R	36.4523	-2.44745	0.986106	-2.48193	0.0130673	0.0685209	NO
LPCAT2	7.57476	-2.4724	0.996215	-2.48179	0.0130724	0.0685209	NO
NUB1	5.22538	2.40975	0.971094	2.48148	0.0130837	0.0685354	NO
PXMP4	3.70691	2.43346	0.981518	2.47928	0.0131647	0.0689144	NO
CXCR4	10.5031	2.56346	1.03413	2.47886	0.0131803	0.0689511	NO
TRIM5	2.12756	-3.02653	1.22108	-2.47856	0.0131913	0.0689636	NO
TM2D3	26.2247	-2.34983	0.949415	-2.47503	0.0133226	0.0696043	NO
UQCRH	34.0907	-1.61969	0.654736	-2.47381	0.013368	0.0696597	NO
MRPL3	13.0437	-2.10255	0.849726	-2.47439	0.0133466	0.0696597	NO
PEX19	13.5601	-2.94756	1.1913	-2.47424	0.013352	0.0696597	NO
HERC2P2	10.3634	-6.73148	2.72104	-2.47386	0.013366	0.0696597	NO
IPO13	3.09389	-3.42458	1.38479	-2.473	0.0133986	0.0697737	NO
DST	57.6168	-1.69273	0.684597	-2.47259	0.0134138	0.0698078	NO
HSPA13	3.41051	-3.91747	1.58473	-2.47201	0.0134356	0.0698755	NO
PIK3CD	13.0686	-2.17953	0.881775	-2.47175	0.0134453	0.0698807	NO
CDK2AP2	2.99019	-2.7182	1.09986	-2.4714	0.0134587	0.0699048	NO
SETD5	8.95447	-2.40336	0.97275	-2.47068	0.0134855	0.0699079	NO
LACTB	12.1011	-2.50879	1.01537	-2.4708	0.013481	0.0699079	NO
SMCHD1	7.67484	-2.64693	1.07124	-2.4709	0.0134773	0.0699079	NO
GALNT1	4.51912	2.97491	1.20434	2.47016	0.0135052	0.0699223	NO
STAT1	120.665	-1.55166	0.628164	-2.47015	0.0135057	0.0699223	NO
CYCS	41.2322	-1.8853	0.763435	-2.46949	0.0135305	0.070005	NO
WBP11P2	1.61168	2.58287	1.04611	2.46903	0.0135481	0.0700293	NO
DTX3	2.2913	-4.35861	1.7654	-2.46891	0.0135526	0.0700293	NO
EEF2	60.5791	-1.13239	0.458708	-2.46866	0.0135621	0.0700327	NO
TGIF1	18.8041	-2.43317	0.986053	-2.46759	0.0136028	0.0701976	NO
RPS16	84.0708	-1.08592	0.440515	-2.46511	0.0136971	0.0705933	NO
DOCK7	20.2801	-2.0545	0.833398	-2.4652	0.0136936	0.0705933	NO
FCRL2	1.49423	2.7355	1.10992	2.4646	0.0137168	0.0706492	NO
RPSA	56.1508	-1.20419	0.488696	-2.46409	0.0137361	0.0707032	NO
ARPIN	11.5563	-2.06918	0.83996	-2.46343	0.0137616	0.0707893	NO
TMEM138	16.6327	-1.9783	0.803186	-2.46307	0.0137754	0.0708143	NO
DCUN1D2	5.03546	-2.17187	0.881859	-2.46283	0.0137844	0.0708153	NO
MKNK1	7.73449	2.41222	0.979789	2.46198	0.0138172	0.0708929	NO
AS3MT	1.6192	-2.25944	0.917689	-2.46209	0.0138129	0.0708929	NO
SQSTM1	38.2177	-1.413	0.57434	-2.46022	0.0138851	0.0711954	NO
KXD1	8.79173	-2.64111	1.07404	-2.45903	0.0139312	0.0713445	NO
CACYBP	9.0324	-2.96774	1.207	-2.45878	0.0139409	0.0713445	NO
MTMR10	2.48202	-4.61994	1.87882	-2.45897	0.0139338	0.0713445	NO
COL6A3	4705.6	0.166852	0.0678857	2.45783	0.0139778	0.0713966	NO
LMNA	54.0906	-1.18006	0.480107	-2.45792	0.0139745	0.0713966	NO
PRODH	5.39789	-3.80629	1.54859	-2.45791	0.0139747	0.0713966	NO
CCT3	20.3441	-1.68486	0.685905	-2.4564	0.0140337	0.0716366	NO
NAP1L1	82.1095	-1.46303	0.596019	-2.45467	0.0141016	0.0719369	NO
DAD1	10.3588	-2.11203	0.860926	-2.4532	0.014159	0.072184	NO
BAG4	2.35655	-3.94228	1.60744	-2.45252	0.014186	0.0722292	NO
STXBP6	8.00519	-4.30501	1.75531	-2.45257	0.014184	0.0722292	NO
ZNF737	3.45115	3.61079	1.47367	2.4502	0.0142778	0.0725586	NO
ALDH3B1	3.83654	3.29785	1.34591	2.45028	0.0142747	0.0725586	NO
CNIH4	9.62919	-3.09884	1.26463	-2.45039	0.0142701	0.0725586	NO
PHF21A	1.66186	4.29792	1.75454	2.44961	0.0143012	0.0725853	NO
RAP2A	7.3939	-3.93721	1.60714	-2.44982	0.0142927	0.0725853	NO
DCAF7	17.7754	-2.02715	0.827926	-2.44847	0.0143464	0.0727686	NO
SAE1	4.17771	3.72841	1.52306	2.44798	0.014366	0.0728218	NO
SEC16A	6.55542	3.05939	1.2505	2.44653	0.0144237	0.073068	NO
SNRPC	9.65699	-2.2205	0.907745	-2.44617	0.0144383	0.0730956	NO
ADGRE2	3.29226	2.27936	0.933283	2.4423	0.0145938	0.0737991	NO
MAGED2	14.4815	-2.17396	0.890227	-2.44203	0.0146048	0.0737991	NO
RSPRY1	2.94952	-4.31632	1.76751	-2.44203	0.0146049	0.0737991	NO
ATP2B1	4.07753	3.59778	1.47377	2.4412	0.0146384	0.0739217	NO
WARS1	37.7706	-1.61021	0.659676	-2.44091	0.0146503	0.0739352	NO
ARHGEF2	5.85706	-2.90058	1.18844	-2.44065	0.0146608	0.0739412	NO
HSD17B11	2.85221	-2.92977	1.20079	-2.43986	0.0146928	0.0740564	NO
TPGS2	19.5573	-2.76029	1.1317	-2.43907	0.014725	0.0741717	NO
PCCA	17.6477	-2.63622	1.08192	-2.43662	0.0148254	0.0746304	NO
RHOF	2.45404	3.68167	1.51137	2.43598	0.0148516	0.0746685	NO
PRPSAP2	5.20099	-3.30135	1.35519	-2.43609	0.014847	0.0746685	NO
VPS51	2.07262	-4.20963	1.72843	-2.43552	0.0148705	0.0747168	NO
ZNF827	2.20236	-3.67931	1.51103	-2.43497	0.0148932	0.0747835	NO
TM9SF2	28.3237	-1.93347	0.794409	-2.43385	0.014939	0.0749668	NO
STRADA	2.3666	-4.06583	1.67071	-2.4336	0.0149495	0.0749722	NO
STX4	6.76339	3.0779	1.2655	2.43217	0.0150087	0.0752218	NO
RGS12	43.5445	-1.79321	0.737637	-2.43102	0.0150564	0.0754139	NO
MFN2	7.50262	-2.57383	1.05953	-2.42923	0.0151311	0.0757405	NO
PTK6	7.47761	1.77978	0.732761	2.42887	0.0151461	0.0757683	NO
COX14	8.99735	-3.10466	1.27907	-2.42728	0.0152127	0.0760538	NO
GOT2	3.3832	-2.36225	0.973452	-2.42667	0.0152381	0.0760704	NO
CD2BP2	4.07587	-2.78078	1.14595	-2.42662	0.01524	0.0760704	NO
CTNND2	2.25971	-4.83707	1.99342	-2.42652	0.0152445	0.0760704	NO
INIP	1.56373	-2.94103	1.21296	-2.42468	0.015322	0.0764095	NO
CLPB	8.29295	-1.60832	0.663495	-2.42401	0.01535	0.0765016	NO
LIN7B	3.02423	3.72264	1.53656	2.42271	0.0154054	0.0767299	NO
MDH1	24.2965	-2.10147	0.867605	-2.42215	0.0154288	0.0767988	NO
ZBTB7A	43.8889	1.73556	0.716703	2.42158	0.015453	0.0768713	NO
ISY1	4.13129	2.92738	1.2092	2.42092	0.0154814	0.0769648	NO
MICOS10	53.3876	-2.06517	0.853144	-2.42066	0.0154923	0.076971	NO
URB1	5.97496	-2.99533	1.23753	-2.42041	0.0155029	0.0769758	NO
FAM133B	16.6008	-1.99797	0.825606	-2.42	0.0155204	0.0770149	NO
NUDT5	11.3305	-3.05214	1.26143	-2.41958	0.0155383	0.077056	NO
EEF2K	5.93789	-2.39415	0.989841	-2.41872	0.0155752	0.0771915	NO
SCNN1A	2.20216	3.1101	1.28649	2.41751	0.0156271	0.0774007	NO
SRGAP2	19.0078	-1.82406	0.754724	-2.41685	0.0156554	0.077493	NO
GPR143	6.37488	-2.23096	0.923294	-2.41631	0.0156789	0.0775133	NO
PAK1	7.36304	-2.62091	1.08467	-2.41632	0.0156782	0.0775133	NO
CTBP1	17.3913	2.33425	0.967317	2.41312	0.0158168	0.0780502	NO
NSUN5P2	21.5869	-1.89722	0.78619	-2.41318	0.0158141	0.0780502	NO
MYEF2	93.3576	-2.20016	0.911644	-2.4134	0.0158045	0.0780502	NO
H3P37	1.77529	3.35066	1.38937	2.41164	0.0158808	0.0782216	NO
HYPK	23.064	-2.20478	0.914085	-2.412	0.0158652	0.0782216	NO
OXSR1	4.3203	-3.79625	1.5741	-2.41169	0.0158786	0.0782216	NO
BLOC1S6	134.983	0.95004	0.394036	2.41105	0.0159067	0.0783006	NO
RARG	3.55757	4.32884	1.79592	2.41037	0.0159363	0.0783983	NO
RAD1	4.5977	-2.5513	1.05865	-2.40996	0.0159541	0.0784379	NO
UACA	14.5923	-3.47224	1.44092	-2.40973	0.0159642	0.0784393	NO
PPM1H	2.65494	-4.31378	1.79032	-2.40951	0.0159742	0.07844	NO
CFAP251	6.12768	2.52162	1.04737	2.40757	0.0160589	0.0788079	NO
PIK3C2B	2.32343	2.87188	1.19325	2.40677	0.0160942	0.0788841	NO
TMX2	13.7272	-1.94052	0.806254	-2.40683	0.0160915	0.0788841	NO
HNRNPC	73.1863	-1.48638	0.617663	-2.40645	0.0161085	0.0789058	NO
PIGP	11.6598	-2.78714	1.15841	-2.40601	0.0161276	0.0789514	NO
UFL1	2.55666	-4.07299	1.69375	-2.40471	0.0161851	0.0791843	NO
CHRAC1	1.53673	-3.14014	1.3062	-2.40401	0.0162161	0.0792876	NO
IK	14.4371	-2.55899	1.06462	-2.40366	0.0162318	0.0793161	NO
EGFR	3.29646	4.83696	2.01275	2.40316	0.0162539	0.0793752	NO
ZNF101	6.90028	2.14256	0.892388	2.40093	0.0163534	0.0798126	NO
PABPC1	178.095	-0.943851	0.393156	-2.4007	0.0163637	0.0798143	NO
GAN	2.80289	1.83961	0.7672	2.39782	0.0164928	0.0803947	NO
ACOT13	3.66907	-2.27306	0.948084	-2.39753	0.0165062	0.0804111	NO
NISCH	4.39795	-3.00787	1.25516	-2.39641	0.0165566	0.0805587	NO
HDAC1	14.8447	-3.0102	1.25605	-2.39657	0.0165492	0.0805587	NO
DPP8	7.65782	-2.8088	1.17234	-2.39589	0.0165799	0.0806231	NO
ETV1	6.22224	-3.88469	1.62178	-2.39533	0.0166055	0.0806986	NO
CCDC115	7.79226	-2.9627	1.23704	-2.39499	0.0166206	0.080723	NO
ABI3BP	4.29046	4.22297	1.76346	2.39471	0.0166336	0.0807371	NO
FBXO48	1.46642	2.38703	0.996977	2.39427	0.0166534	0.080784	NO
TM4SF1	2.592	3.9547	1.65206	2.3938	0.0166747	0.0807898	NO
DENND2B	2.70487	3.18376	1.32994	2.39391	0.01667	0.0807898	NO
ST14	1.49081	3.32313	1.38845	2.39341	0.0166927	0.0808278	NO
WNK4	4.59475	2.12564	0.888341	2.39282	0.0167195	0.0809087	NO
ADSS2	6.79878	-2.92669	1.22423	-2.39063	0.0168193	0.0813423	NO
ATP5PF	31.3867	-2.0876	0.873431	-2.39012	0.016843	0.0814077	NO
KLHL11	1.92464	-4.52877	1.89613	-2.38843	0.0169205	0.081733	NO
NRG1	2.48424	4.19088	1.75556	2.3872	0.016977	0.0818915	NO
TMED2	29.5392	-1.65591	0.693698	-2.38708	0.016983	0.0818915	NO
POLR3GL	2.01905	-3.22359	1.35045	-2.38705	0.016984	0.0818915	NO
COLGALT1	12.1913	-2.28756	0.95864	-2.38626	0.0170209	0.0820202	NO
PPIA	198.131	-0.999699	0.419079	-2.38547	0.0170575	0.082147	NO
SSR3	28.4221	-1.8604	0.779977	-2.3852	0.0170699	0.0821572	NO
MYO10	25.8176	-1.88482	0.790478	-2.3844	0.0171068	0.0822855	NO
RPL8	58.7166	-1.15992	0.486649	-2.38348	0.0171497	0.0824285	NO
CD46	63.0235	-1.70269	0.714418	-2.38332	0.0171572	0.0824285	NO
PTCH1	3.38272	4.47361	1.87989	2.37972	0.0173257	0.0831689	NO
ASAP1	14.1869	-2.45758	1.03281	-2.37951	0.0173357	0.0831689	NO
ARL1	6.19713	-2.86226	1.20295	-2.37937	0.0173424	0.0831689	NO
ZNF2	3.62206	-2.53177	1.0645	-2.37837	0.0173893	0.0833435	NO
RPL34	81.5106	-0.89075	0.374635	-2.37765	0.0174236	0.083458	NO
PRELID1	7.7796	-2.26931	0.954593	-2.37726	0.017442	0.0834961	NO
PIGS	10.1059	-3.086	1.29867	-2.37627	0.0174885	0.0836689	NO
BCLAF1	11.136	-2.58188	1.08663	-2.37605	0.0174993	0.0836706	NO
CREBBP	18.7859	-2.11362	0.890128	-2.37452	0.017572	0.0839678	NO
TRIM59	3.9963	2.18684	0.921261	2.37375	0.0176085	0.084042	NO
BTN2A2	11.1006	-2.94862	1.24217	-2.37375	0.0176083	0.084042	NO
IFIT3	20.1458	-1.93227	0.814336	-2.37281	0.0176533	0.0842055	NO
BOLA2B	5.64753	-2.76405	1.16519	-2.37219	0.0176828	0.084296	NO
TNPO1	25.6895	-2.27421	0.959199	-2.37095	0.0177423	0.0845296	NO
ZNF141	25.9818	-1.60234	0.675931	-2.37056	0.0177612	0.0845692	NO
RPL18A	64.7908	-1.13375	0.479189	-2.36598	0.0179826	0.0855724	NO
ZNF121	2.03174	2.64279	1.1174	2.36512	0.0180243	0.0856696	NO
PIGH	16.1966	-2.05397	0.868523	-2.3649	0.0180351	0.0856696	NO
SNTA1	2.30073	-3.55318	1.50247	-2.3649	0.018035	0.0856696	NO
PTPRE	3.62366	3.44358	1.45645	2.36436	0.018061	0.0857416	NO
UBA2	22.9479	-2.01149	0.85097	-2.36376	0.0180906	0.0858313	NO
SLC25A16	13.6416	-1.88786	0.799149	-2.36233	0.0181602	0.0861105	NO
TACC1	25.5637	-1.94052	0.821797	-2.36131	0.0182105	0.0862979	NO
DPY19L2P2	3.59978	2.77136	1.17399	2.36063	0.018244	0.0864054	NO
BTN3A3	10.9127	-3.25153	1.37758	-2.36031	0.0182595	0.0864276	NO
SDCBP	127.971	-1.26745	0.537305	-2.35891	0.0183287	0.0866427	NO
ATP1B2	1.79872	-3.18106	1.34863	-2.35873	0.0183374	0.0866427	NO
LYSMD3	2.88451	-4.13046	1.75094	-2.35899	0.0183245	0.0866427	NO
GRIPAP1	3.86833	2.86022	1.21334	2.35732	0.0184076	0.0868205	NO
MTRNR2L10	4.06344	-2.12206	0.900179	-2.35737	0.0184049	0.0868205	NO
LAGE3	4.71153	-3.16023	1.34037	-2.35773	0.018387	0.0868205	NO
ABHD17B	2.45726	-3.22683	1.36919	-2.35674	0.0184362	0.0869041	NO
RPS20	142.889	-1.0964	0.465348	-2.35608	0.0184689	0.0870073	NO
IQGAP2	1.48159	3.36694	1.42948	2.35536	0.018505	0.0871257	NO
TUBB4B	10.5358	2.43235	1.03339	2.35376	0.0185847	0.0874495	NO
GSTA4	2.4917	3.30355	1.40495	2.35136	0.0187051	0.0879643	NO
GCNT3	1.75806	2.06285	0.877452	2.35096	0.0187251	0.0880067	NO
L1CAM	1.96036	4.81182	2.04745	2.35015	0.0187656	0.0881455	NO
TMEM159	2.38794	2.04516	0.871447	2.34685	0.0189326	0.0888258	NO
ANP32A	9.72238	-2.25435	0.960516	-2.34702	0.0189245	0.0888258	NO
ZMAT3	17.0978	-1.22356	0.52141	-2.34663	0.0189441	0.0888277	NO
VPS28	1.42574	4.29823	1.83199	2.34621	0.0189652	0.0888742	NO
ZNF558	5.33153	-2.19786	0.938453	-2.342	0.0191805	0.0898308	NO
PON2	15.2439	-2.04487	0.87354	-2.3409	0.0192372	0.089991	NO
HADHA	2.93226	-2.45405	1.04826	-2.34107	0.0192287	0.089991	NO
FLI1	3.72398	3.70945	1.58496	2.34041	0.0192624	0.0900561	NO
RBM27	9.14396	-3.18	1.3593	-2.33945	0.0193123	0.0902368	NO
SERPINB3	3.14616	5.55019	2.37316	2.33874	0.0193491	0.09029	NO
ANKRD13A	7.94669	-2.02311	0.865181	-2.33837	0.0193681	0.09029	NO
ENGASE	1.62848	-3.31405	1.41726	-2.33836	0.0193688	0.09029	NO
FAH	1.9324	-4.62017	1.97565	-2.33856	0.0193583	0.09029	NO
RAB18	5.69683	-2.64896	1.13322	-2.33754	0.0194111	0.0904344	NO
CD3D	3.27751	3.93444	1.6847	2.33539	0.0195231	0.0908506	NO
PRRT4	1.84921	-4.74913	2.03354	-2.3354	0.0195224	0.0908506	NO
TAGLN	2.08523	3.54635	1.51876	2.33504	0.0195415	0.0908832	NO
UBR1	26.355	-3.10818	1.33155	-2.33426	0.0195822	0.0910196	NO
PLA1A	6.08612	-2.7658	1.18513	-2.33375	0.0196087	0.0910902	NO
NPIPP1	12.19	-2.80856	1.20387	-2.33294	0.0196513	0.0912351	NO
RFX2	1.45653	3.48693	1.49566	2.33136	0.0197344	0.0915675	NO
C16orf72	9.37397	-1.75233	0.752442	-2.32886	0.0198665	0.0921271	NO
PLEKHA1	9.79235	1.88949	0.812581	2.3253	0.0200561	0.092845	NO
GPRIN3	8.15027	-2.18748	0.940709	-2.32535	0.0200533	0.092845	NO
PPFIBP2	4.39395	-3.06518	1.31799	-2.32564	0.0200379	0.092845	NO
RBM26	17.6814	-2.56167	1.10218	-2.32419	0.0201154	0.0930658	NO
VPS39	2.97898	-2.94641	1.26814	-2.32341	0.0201573	0.0932057	NO
MZT2A	8.81118	-2.10051	0.904314	-2.32277	0.0201918	0.0933111	NO
PABPC4	18.6462	-1.51062	0.650488	-2.32229	0.0202173	0.093375	NO
CD81	53.7679	-1.25032	0.538749	-2.32079	0.0202983	0.0936953	NO
NME7	27.4896	-2.36532	1.01941	-2.32029	0.0203254	0.0937247	NO
CD48	6.33445	-3.61214	1.5568	-2.32024	0.0203281	0.0937247	NO
MORN3	1.99476	1.85296	0.799328	2.31815	0.0204412	0.0941858	NO
ARHGEF12	12.9953	1.57605	0.679933	2.31796	0.0204516	0.0941858	NO
EFHC1	10.6741	-2.42965	1.04829	-2.31772	0.0204643	0.0941899	NO
INPP5E	1.66429	4.51843	1.95111	2.31583	0.0205677	0.0944882	NO
BANF1	19.8236	-1.8979	0.819541	-2.31581	0.0205687	0.0944882	NO
PPP1R15B	9.60772	-2.35047	1.01484	-2.31609	0.0205531	0.0944882	NO
ARMT1	7.56056	-3.74322	1.61647	-2.31567	0.0205763	0.0944882	NO
PIN1	6.05913	-2.34729	1.0139	-2.31511	0.0206067	0.0945733	NO
ZFYVE27	3.58364	-3.60947	1.55939	-2.31466	0.0206313	0.0946323	NO
SNRPA1	23.9026	-2.34481	1.01375	-2.313	0.0207227	0.0949968	NO
MRPL33	20.4125	-2.12962	0.92086	-2.31264	0.0207423	0.095027	NO
ANKRD17	15.3247	-2.8462	1.23082	-2.31245	0.020753	0.095027	NO
TGFBR1	7.01967	-2.93218	1.26823	-2.31202	0.0207767	0.0950812	NO
NNMT	4.65765	-2.84231	1.22951	-2.31175	0.0207917	0.0950953	NO
ADIPOR2	4.19992	-2.42269	1.04811	-2.31148	0.0208061	0.0951069	NO
PPP2R5B	3.23797	5.05791	2.18901	2.3106	0.0208552	0.0951682	NO
RRP36	4.03509	-2.37338	1.02717	-2.31061	0.0208545	0.0951682	NO
CTNNBL1	2.46627	-3.97488	1.71999	-2.31098	0.0208338	0.0951682	NO
FRMD4A	6.66943	3.18876	1.38044	2.30997	0.02089	0.0952728	NO
ZNF326	11.4003	-3.0918	1.33892	-2.30918	0.0209336	0.0954174	NO
TRAF3IP2	65.738	-2.25613	0.977358	-2.3084	0.0209768	0.0955598	NO
MYDGF	7.85482	-2.41301	1.04566	-2.30764	0.0210191	0.0956979	NO
LSP1	9.69783	2.30871	1.00083	2.30678	0.0210669	0.0958063	NO
CNOT9	3.53269	-2.53968	1.10093	-2.30685	0.021063	0.0958063	NO
KHDRBS3	2.09371	-4.89328	2.12306	-2.30483	0.0211761	0.0962483	NO
ECHDC2	7.06991	2.39485	1.03966	2.30349	0.0212513	0.0964808	NO
ESF1	3.46802	-2.95975	1.28479	-2.30369	0.0212399	0.0964808	NO
LFNG	1.40394	4.27619	1.85676	2.30304	0.0212766	0.096541	NO
ZNF362	3.88882	-2.85938	1.24224	-2.30179	0.0213471	0.0968058	NO
FARSB	2.53237	2.18161	0.948249	2.30067	0.0214104	0.0970377	NO
TSPAN6	4.90877	-2.19312	0.953392	-2.30033	0.0214295	0.0970696	NO
BAIAP2L1	4.00517	-2.87852	1.25203	-2.29909	0.0215	0.0973338	NO
HMGN1	37.2981	-1.44422	0.628372	-2.29835	0.021542	0.0974688	NO
ZBED5	2.95884	2.63802	1.14799	2.29796	0.0215643	0.0975144	NO
NPIPB5	58.3969	1.44521	0.629057	2.29742	0.0215946	0.0975412	NO
PSMB5	8.31353	-2.40366	1.04621	-2.2975	0.0215903	0.0975412	NO
APOL1	18.5029	-1.98167	0.863071	-2.29607	0.0216721	0.0977261	NO
BTBD1	3.39583	-2.76206	1.20284	-2.29628	0.0216597	0.0977261	NO
ZNF320	4.47926	-3.34091	1.45493	-2.29627	0.0216606	0.0977261	NO
SLC4A7	8.90549	-3.53234	1.54066	-2.29274	0.021863	0.0985311	NO
RNF150	2.9152	-4.0363	1.76076	-2.29236	0.0218849	0.0985746	NO
DVL1	4.96171	-2.77168	1.20922	-2.29212	0.0218985	0.0985801	NO
ALX1	2.51116	-4.46461	1.94806	-2.29183	0.0219155	0.0986013	NO
HERC5	2.05937	-3.44929	1.50552	-2.29109	0.021958	0.0987368	NO
VCPIP1	2.36392	-2.77966	1.21345	-2.29071	0.0219803	0.0987817	NO
CLCN7	24.4454	-1.63023	0.71176	-2.29042	0.0219972	0.0988025	NO
LPXN	7.47373	3.4812	1.52019	2.28998	0.0220228	0.0988062	NO
IFI16	101.065	-1.1226	0.490208	-2.29005	0.0220185	0.0988062	NO
SIRPA	13.7425	-1.67991	0.734252	-2.28792	0.0221422	0.099212	NO
MAGED1	30.1579	-2.04895	0.89547	-2.28813	0.02213	0.099212	NO
TCN2	1.81717	-3.15412	1.37868	-2.28778	0.0221504	0.099212	NO
MCRIP1	5.77849	-2.63614	1.15278	-2.28677	0.022209	0.099419	NO
IL17RC	3.08891	-2.25385	0.985869	-2.28616	0.022245	0.0995244	NO
DOCK6	3.83362	2.96306	1.2969	2.28472	0.0223295	0.0996795	NO
ANP32B	16.8989	-1.94411	0.85069	-2.28534	0.0222932	0.0996795	NO
NAA40	4.43901	-2.94641	1.28951	-2.2849	0.0223185	0.0996795	NO
TCAF1	6.22876	-3.07211	1.3445	-2.28495	0.0223158	0.0996795	NO
AP1M1	122.128	-1.70947	0.748475	-2.28394	0.0223753	0.0997706	NO
MTA1	8.38255	-2.74099	1.20019	-2.28379	0.0223839	0.0997706	NO
FUZ	1.60591	-3.22345	1.41148	-2.28373	0.0223873	0.0997706	NO
PNKD	2.20688	-3.30288	1.4465	-2.28337	0.0224087	0.0998106	NO
RIF1	6.8555	2.28516	1.00132	2.28213	0.0224815	0.100023	NO
EIF3H	13.9753	-2.06811	0.906152	-2.2823	0.0224715	0.100023	NO
LGI1	2.09338	2.01582	0.883961	2.28044	0.0225814	0.100356	NO
DHX9	26.1998	-1.97763	0.867156	-2.28059	0.0225725	0.100356	NO
C15orf61	2.88311	-4.14881	1.81958	-2.2801	0.022602	0.100392	NO
IGFBP3	4.01004	3.59977	1.57912	2.27961	0.022631	0.100415	NO
FAU	51.2983	-1.07798	0.472886	-2.27958	0.0226323	0.100415	NO
SEC22B	13.2389	-2.3617	1.03646	-2.27862	0.0226899	0.100615	NO
ANKDD1A	13.4187	-2.89901	1.27305	-2.27722	0.0227733	0.100929	NO
GTF2IRD1	16.9714	-2.72187	1.1964	-2.27506	0.0229026	0.101446	NO
RPS11	61.5582	-0.885724	0.389468	-2.27419	0.0229547	0.101592	NO
CORO2B	2.24762	-5.04852	2.22002	-2.27408	0.0229611	0.101592	NO
GANAB	10.4528	-1.3728	0.604239	-2.27195	0.0230898	0.102105	NO
KLF3	2.20912	3.50232	1.54246	2.2706	0.023171	0.102354	NO
TYRP1	400.164	-1.1203	0.493396	-2.27059	0.0231715	0.102354	NO
DPH3	7.74792	-3.76614	1.66	-2.26876	0.023283	0.102789	NO
MSH2	3.06981	-2.89216	1.27499	-2.26837	0.0233067	0.102837	NO
HELZ2	4.22446	-2.33211	1.0282	-2.26815	0.0233202	0.10284	NO
AEN	1.37821	-2.74216	1.20926	-2.26763	0.0233515	0.102921	NO
CD276	21.606	-2.00686	0.885185	-2.26717	0.0233799	0.102933	NO
RAB14	7.96259	-2.27026	1.0013	-2.26731	0.0233711	0.102933	NO
GNL3	16.7306	-2.40887	1.06266	-2.26682	0.0234014	0.102971	NO
DHX58	3.29535	-3.84416	1.69679	-2.26555	0.0234792	0.103257	NO
RBM17	28.2927	-2.11111	0.932136	-2.26481	0.0235244	0.103379	NO
NIFK	10.1371	-2.48863	1.09889	-2.26467	0.0235328	0.103379	NO
ZNF106	46.4146	-1.70678	0.753742	-2.2644	0.0235493	0.103395	NO
SLC35A4	3.07742	-2.93673	1.29708	-2.26411	0.0235674	0.103418	NO
PGM5P2	10.0297	1.77347	0.783571	2.26332	0.0236158	0.103573	NO
FBN1	4.10396	2.95503	1.30685	2.26118	0.0237481	0.104076	NO
PPP1R37	5.42994	-2.55737	1.13106	-2.26105	0.0237565	0.104076	NO
SPACA9	2.02925	2.54877	1.12862	2.25831	0.0239262	0.104762	NO
GCSH	3.42516	-4.9011	2.17046	-2.25809	0.0239398	0.104765	NO
KDM2A	24.7198	-1.83789	0.814565	-2.25628	0.024053	0.105145	NO
GDAP2	1.3911	-3.14834	1.39528	-2.25642	0.0240443	0.105145	NO
ANKFY1	8.07145	-2.19763	0.974519	-2.25509	0.0241275	0.105413	NO
HERC2P9	8.74396	-2.32147	1.02961	-2.25471	0.0241518	0.105462	NO
NR2F6	1.70143	-3.80457	1.68759	-2.25444	0.0241685	0.105477	NO
ATOX1	8.30207	-2.2096	0.980248	-2.25413	0.0241882	0.105505	NO
EXPH5	5.69161	1.61041	0.715478	2.25081	0.0243974	0.10636	NO
LGALSL	3.43558	4.66433	2.07404	2.24892	0.0245178	0.106768	NO
CALM3	34.4473	-1.5897	0.706847	-2.24901	0.0245121	0.106768	NO
SMAD1	1.6184	3.23972	1.44119	2.24795	0.0245796	0.106921	NO
PEX1	8.54787	-2.51288	1.1178	-2.24805	0.0245731	0.106921	NO
RPS10P7	1.31701	2.62472	1.16804	2.24711	0.0246327	0.107094	NO
DAPP1	6.3229	3.15684	1.40503	2.24681	0.0246525	0.107122	NO
ECPAS	14.0504	-2.79274	1.24332	-2.2462	0.0246912	0.107232	NO
OXCT1	2.8253	2.47531	1.10312	2.24391	0.0248381	0.107767	NO
LRRFIP2	8.20135	-2.5036	1.11575	-2.24386	0.0248414	0.107767	NO
EIF1B	12.7987	-2.87416	1.28138	-2.24301	0.024896	0.107906	NO
ERCC5	2.84731	-2.95708	1.31839	-2.24294	0.0249004	0.107906	NO
GPLD1	1.28408	1.82857	0.815842	2.24133	0.025005	0.108242	NO
PNPLA8	3.06372	-3.35818	1.49828	-2.24137	0.0250024	0.108242	NO
GALNT11	9.73203	-2.71216	1.21019	-2.2411	0.0250195	0.108247	NO
MEFV	3.75296	-2.14836	0.958787	-2.24071	0.0250451	0.108299	NO
TEPSIN	2.63119	4.32974	1.93293	2.23999	0.0250915	0.108441	NO
CDK11A	1.68966	4.46015	1.99446	2.23627	0.025334	0.109188	NO
CNTNAP3B	15.4406	3.13617	1.40248	2.23616	0.0253413	0.109188	NO
BRI3BP	2.99418	2.09902	0.938702	2.23608	0.0253463	0.109188	NO
RWDD1	13.2826	-2.32656	1.04013	-2.23679	0.0253004	0.109188	NO
FBXO9	20.1278	-2.38176	1.06488	-2.23666	0.0253088	0.109188	NO
NLN	1.32232	-2.82867	1.2645	-2.23698	0.0252875	0.109188	NO
STON2	1.44181	3.18491	1.42464	2.23559	0.0253789	0.10927	NO
PTTG1IP	19.4587	-1.72329	0.77128	-2.23433	0.0254613	0.109566	NO
CRYBG1	11.2692	2.63271	1.17869	2.23359	0.02551	0.109717	NO
MT1G	2.92725	-3.11432	1.39523	-2.23212	0.0256073	0.110076	NO
PBXIP1	2.46522	-2.68276	1.20236	-2.23123	0.0256656	0.110267	NO
FUBP1	30.514	-2.33113	1.04503	-2.23068	0.0257026	0.110367	NO
FXYD3	18.2327	2.0444	0.917034	2.22936	0.02579	0.110623	NO
PHF10	14.1638	-2.58632	1.16007	-2.22944	0.0257847	0.110623	NO
TMEM116	2.68781	2.53657	1.13852	2.22796	0.0258834	0.110905	NO
ATP6V1D	6.4122	-2.19482	0.985107	-2.228	0.0258806	0.110905	NO
TEAD1	7.86312	-2.42129	1.08701	-2.22747	0.0259159	0.110985	NO
HPS1	12.0266	-2.72075	1.2217	-2.22702	0.0259458	0.111054	NO
GTF2A2	18.2644	-2.54242	1.14193	-2.22642	0.0259861	0.111107	NO
MID1IP1	5.71669	-2.73749	1.22949	-2.22652	0.025979	0.111107	NO
ARNTL2	1.88926	2.81893	1.26652	2.22574	0.0260319	0.111184	NO
TMEM59	101.113	-1.91798	0.861657	-2.22591	0.0260199	0.111184	NO
CAPG	3.8173	2.78628	1.2523	2.22493	0.0260861	0.111324	NO
PDLIM1	12.2958	2.52009	1.13282	2.22463	0.0261063	0.111324	NO
TMEM33	19.8283	-1.94113	0.87253	-2.22472	0.0261001	0.111324	NO
UIMC1	1.56241	2.59168	1.16558	2.22351	0.0261816	0.111585	NO
FOSL2	8.68438	2.84791	1.28215	2.22121	0.0263369	0.112068	NO
TBCA	30.2674	-1.65266	0.74393	-2.22152	0.0263157	0.112068	NO
LAMA5	26.3105	-1.92578	0.866936	-2.22136	0.0263263	0.112068	NO
RPS2	106.37	-0.86663	0.390247	-2.22072	0.02637	0.112122	NO
PNISR	119.714	-1.5159	0.682667	-2.22056	0.0263809	0.112122	NO
TIMM10B	1.35466	-2.94034	1.32424	-2.2204	0.0263916	0.112122	NO
DRAXIN	4.09154	1.90054	0.856104	2.21998	0.0264198	0.112136	NO
DNAAF5	4.43812	-2.8338	1.27652	-2.21994	0.0264229	0.112136	NO
ARSB	4.88881	-1.99792	0.900148	-2.21955	0.0264493	0.112181	NO
SRP19	25.0894	-2.36578	1.06597	-2.21937	0.0264615	0.112181	NO
SCARF1	1.58403	2.91048	1.31185	2.21861	0.0265135	0.112342	NO
HECA	3.01507	2.63179	1.18663	2.21788	0.0265633	0.112494	NO
COPS3	1.71066	-3.75782	1.69453	-2.21761	0.0265812	0.11251	NO
SPATA33	3.72531	3.73663	1.68569	2.21668	0.0266449	0.11266	NO
TACC2	11.7011	1.77983	0.802923	2.21669	0.0266445	0.11266	NO
MAST1	1.66666	-2.84291	1.28279	-2.2162	0.0266779	0.112731	NO
MBD6	12.3751	-2.87798	1.29871	-2.21602	0.0266898	0.112731	NO
FEM1C	1.79338	-3.55138	1.60274	-2.21581	0.0267045	0.112734	NO
RPL22	110.572	-1.08818	0.491207	-2.21532	0.0267383	0.112757	NO
PAPOLA	48.801	-1.82348	0.82308	-2.21543	0.0267306	0.112757	NO
SYDE1	5.29082	-3.11916	1.40853	-2.21448	0.0267955	0.112939	NO
STK38	1.55453	3.33495	1.50802	2.21148	0.0270029	0.113694	NO
PROS1	5.74388	-3.41344	1.54349	-2.21151	0.0270003	0.113694	NO
ZNF75A	2.09022	3.21515	1.45467	2.21023	0.027089	0.113936	NO
HR	2.99317	3.00452	1.35931	2.21033	0.0270822	0.113936	NO
SELENOM	11.0176	-2.61283	1.18397	-2.20683	0.0273257	0.114871	NO
ZMIZ1	5.62992	2.89136	1.31032	2.2066	0.0273421	0.11488	NO
PCBD1	7.31957	-2.6998	1.22465	-2.20455	0.0274854	0.115421	NO
N4BP2	1.80416	3.9121	1.77506	2.20392	0.0275296	0.115547	NO
KLHL33	3.51672	1.95368	0.887696	2.20084	0.0277474	0.116258	NO
PCDHA4	6.49704	1.86426	0.8472	2.2005	0.0277718	0.116258	NO
TTC37	11.2262	-2.63792	1.19862	-2.20079	0.027751	0.116258	NO
MRPL11	4.32125	-2.83337	1.28743	-2.20079	0.0277512	0.116258	NO
IGHMBP2	3.08968	-2.97869	1.35363	-2.20052	0.0277701	0.116258	NO
RPGRIP1L	1.33345	2.57299	1.1697	2.1997	0.0278284	0.116434	NO
TMEM14A	13.1817	-3.08298	1.40218	-2.19871	0.0278986	0.116654	NO
FEN1	7.69408	-3.37192	1.5337	-2.19855	0.0279101	0.116654	NO
ANAPC16	16.6902	-1.79873	0.818515	-2.19755	0.0279809	0.116889	NO
FKBP14	5.93954	-1.79125	0.815426	-2.19671	0.0280414	0.117081	NO
TANC2	1.95827	3.86268	1.75947	2.19536	0.0281374	0.117396	NO
FRRS1L	1.69702	2.03708	0.927952	2.19524	0.0281463	0.117396	NO
TWIST1	3.06569	-3.30777	1.50734	-2.19443	0.0282042	0.117523	NO
GNG10	3.8126	-3.3854	1.54274	-2.19441	0.0282062	0.117523	NO
SLC16A7	11.2595	-1.56302	0.712574	-2.19348	0.0282725	0.117738	NO
KLF15	3.79818	-3.76436	1.71635	-2.19323	0.0282908	0.117753	NO
SGPL1	2.33134	-2.69319	1.22824	-2.19272	0.0283273	0.117844	NO
RIPK2	5.85548	-3.96521	1.80861	-2.19241	0.02835	0.117877	NO
CCN1	6.77057	3.01222	1.37414	2.19208	0.0283735	0.117913	NO
ARHGAP30	1.61661	3.26394	1.4891	2.19188	0.0283882	0.117914	NO
PLEKHG2	1.89732	2.25959	1.03193	2.18967	0.0285484	0.118517	NO
THUMPD3	2.00914	-3.76092	1.71848	-2.18851	0.0286324	0.118804	NO
SPATA20	4.171	-2.39112	1.09321	-2.18724	0.0287247	0.119126	NO
IRF8	6.8607	3.22102	1.47341	2.1861	0.0288084	0.119349	NO
RPS15A	122.277	-0.860085	0.393433	-2.1861	0.0288082	0.119349	NO
STAT5B	5.20419	2.43812	1.11594	2.1848	0.0289033	0.11968	NO
ZNF417	2.69215	2.22733	1.01975	2.1842	0.0289477	0.11974	NO
MX1	11.3791	-1.93755	0.887028	-2.18431	0.0289394	0.11974	NO
COX7B	46.024	-1.87089	0.85668	-2.18389	0.0289705	0.119773	NO
LTBP4	14.3559	2.50681	1.14886	2.182	0.0291094	0.120285	NO
MPP4	2.50244	2.18193	1.00007	2.18177	0.0291268	0.120295	NO
HIF1AN	7.56524	-2.40847	1.10478	-2.18004	0.0292544	0.120759	NO
LIG1	8.0516	-2.36897	1.08691	-2.17954	0.0292914	0.12085	NO
SLC25A13	4.91964	-2.59696	1.19181	-2.179	0.0293316	0.120953	NO
PSMD9	9.69605	-1.54129	0.707841	-2.17746	0.0294464	0.121358	NO
COPG1	13.5449	-1.93895	0.890541	-2.17727	0.0294602	0.121358	NO
HNRNPK	73.5239	-1.05736	0.485722	-2.17689	0.0294887	0.121413	NO
PFDN1	12.8522	-2.85039	1.30988	-2.17607	0.0295497	0.121602	NO
PRAME	5.55052	-3.25756	1.49733	-2.17558	0.0295868	0.121692	NO
COL27A1	77.1305	-1.46514	0.67355	-2.17525	0.0296113	0.12173	NO
TSN	12.838	-2.4298	1.11714	-2.17503	0.0296282	0.121737	NO
TERF1	5.55975	-2.05104	0.943427	-2.17404	0.0297024	0.12198	NO
INTS6	12.9592	2.15784	0.993235	2.17253	0.0298154	0.122193	NO
GHITM	13.9443	-1.79523	0.826203	-2.17287	0.0297898	0.122193	NO
PDCD5	11.9419	-2.34177	1.07787	-2.1726	0.0298105	0.122193	NO
NT5DC1	3.11117	-3.10248	1.42781	-2.17289	0.0297886	0.122193	NO
ESD	9.07934	-2.5998	1.19682	-2.17226	0.0298362	0.122216	NO
OTUD5	1.37989	-2.41036	1.10978	-2.17193	0.0298612	0.122255	NO
SNRPD3	12.6129	-1.94746	0.897035	-2.17099	0.0299316	0.122481	NO
PDP2	3.86164	-1.58105	0.728623	-2.16991	0.0300134	0.122628	NO
GOLGA4	14.0903	-2.69737	1.2429	-2.17023	0.0299897	0.122628	NO
MAPK10	2.91356	-2.72748	1.25684	-2.1701	0.0299989	0.122628	NO
PAQR7	1.55309	3.17499	1.4641	2.16857	0.0301153	0.122859	NO
RBM7	2.22371	3.12341	1.44045	2.16836	0.0301315	0.122859	NO
SF3B3	42.5806	-1.82335	0.840884	-2.16838	0.0301301	0.122859	NO
GIPC1	17.752	-2.58643	1.19267	-2.1686	0.0301128	0.122859	NO
HTRA4	3.15478	3.33804	1.54038	2.16702	0.0302336	0.123213	NO
KIF3B	4.65455	-2.8487	1.31471	-2.16679	0.030251	0.123221	NO
ECT2	5.94511	2.2925	1.05952	2.16372	0.030486	0.124081	NO
SIGLEC6	1.28723	-1.87796	0.86802	-2.1635	0.0305029	0.124081	NO
TRAF4	2.18335	-3.10151	1.43361	-2.16342	0.0305087	0.124081	NO
TMEM223	1.62341	-3.13724	1.45048	-2.16289	0.0305497	0.124185	NO
KLHL42	5.34421	-3.12457	1.44582	-2.16111	0.0306868	0.12466	NO
NAT10	4.34026	-3.94466	1.82541	-2.16097	0.0306977	0.12466	NO
PSMA7	28.5704	-1.3344	0.617791	-2.15995	0.0307764	0.124754	NO
ELP2	26.2844	-1.64116	0.75982	-2.15993	0.0307783	0.124754	NO
ROMO1	19.6788	-1.71271	0.792977	-2.15985	0.0307844	0.124754	NO
PTPN1	5.12864	-1.74402	0.80755	-2.15965	0.0308	0.124754	NO
FCGR2A	13.3986	-2.42558	1.12278	-2.16033	0.030747	0.124754	NO
LHFPL6	7.0754	-3.47998	1.6115	-2.15946	0.0308144	0.124754	NO
PER1	15.0821	2.0266	0.938696	2.15895	0.0308539	0.12485	NO
ZNF500	4.155	-2.27216	1.05276	-2.15829	0.030905	0.124994	NO
RBBP7	36.405	-2.08354	0.965993	-2.15689	0.0310146	0.125374	NO
EFCAB3	3.99111	3.29121	1.52637	2.15623	0.0310655	0.125517	NO
EMBP1	3.0935	-2.50509	1.16227	-2.15534	0.0311352	0.125735	NO
CXCL11	3.82552	3.89151	1.8065	2.15417	0.0312266	0.125778	NO
AIG1	1.34212	2.70199	1.25443	2.15396	0.0312432	0.125778	NO
RPS15	59.2787	-0.984056	0.456868	-2.15391	0.0312469	0.125778	NO
GFPT1	4.89162	-2.05041	0.951746	-2.15437	0.0312113	0.125778	NO
MR1	13.3109	-2.22541	1.03325	-2.1538	0.0312559	0.125778	NO
DBP	3.26875	-2.81125	1.30461	-2.15485	0.0311733	0.125778	NO
SDHAF3	4.75776	-3.21392	1.49216	-2.15387	0.0312501	0.125778	NO
FIP1L1	9.45528	-3.02943	1.40717	-2.15286	0.03133	0.126013	NO
TNFRSF25	1.75174	2.49398	1.15882	2.15217	0.0313837	0.126102	NO
CRELD1	3.25778	-2.97439	1.38199	-2.15225	0.0313775	0.126102	NO
SNX7	4.22015	-3.76575	1.75085	-2.15082	0.0314905	0.126468	NO
MYO1G	2.32215	4.00623	1.86347	2.14988	0.0315651	0.126513	NO
HEXB	16.4872	-1.76388	0.820336	-2.1502	0.0315397	0.126513	NO
STX10	2.02767	-2.81386	1.30876	-2.15001	0.0315541	0.126513	NO
ATP5MC1	7.30172	-3.12321	1.45271	-2.14992	0.0315614	0.126513	NO
SPCS1	58.9878	-1.68953	0.786089	-2.14929	0.0316114	0.126635	NO
[truncated: 17,586 more rows]

## Sheet: DEG_EM_vs_IM
Differential Expression Analysis between EM and IM
	baseMean	log2FoldChange	lfcSE	stat	pvalue	padj
KLF4	14.9915	-51.7911	2.08457	-24.8449	2.9325e-136	2.66447e-132
CCN3	26.1618	-41.6024	1.86985	-22.2491	1.15048e-109	5.22665e-106
DSG1	25.0017	-36.9599	1.86743	-19.7918	3.50232e-87	1.06073e-83
DSP	33.3083	30.693	1.5802	19.4234	4.89127e-84	1.11105e-80
CTXND1	4.13701	-52.5215	2.90541	-18.0771	4.82643e-73	8.77059e-70
ZBTB44	5.38205	45.248	2.8224	16.0318	7.66541e-58	1.1608e-54
KRT5	509.434	21.1401	1.3293	15.9032	6.02479e-57	7.82018e-54
S100A9	51.4087	20.1734	1.34428	15.0069	6.61785e-51	7.51622e-48
TNKS1BP1	12.2527	25.314	1.83942	13.7619	4.31937e-43	4.36065e-40
KRT14	232.769	17.5043	1.3038	13.4256	4.28038e-41	3.88915e-38
PELI1	2.01522	-50.7388	3.9038	-12.9973	1.26796e-38	1.04733e-35
RGS1	50.69	22.3215	1.83668	12.1532	5.51826e-34	4.17824e-31
RNASE1	13.3242	23.276	1.94118	11.9906	3.97859e-33	2.78073e-30
CD4	8.60703	-22.6041	1.90004	-11.8967	1.23146e-32	7.9922e-30
TXNDC17	11.8597	24.6579	2.13427	11.5533	7.1014e-31	4.30155e-28
TNFSF13B	12.9805	-25.5433	2.25992	-11.3027	1.27212e-29	7.22402e-27
CORO1A	10.361	-22.3136	1.98248	-11.2554	2.17905e-29	1.16464e-26
ID1	16.8978	21.0333	1.87991	11.1885	4.6435e-29	2.34393e-26
MKKS	1.81382	40.0705	3.71939	10.7734	4.59628e-27	2.19799e-24
PCSK2	24.2849	-17.5934	1.63523	-10.759	5.37385e-27	2.44134e-24
COL1A2	122.165	-15.3637	1.4361	-10.6982	1.0381e-26	4.4915e-24
LLPH	3.23261	21.123	1.98097	10.6629	1.51738e-26	6.26677e-24
ZFAND2B	3.16845	-43.8431	4.28316	-10.2361	1.36568e-24	5.39502e-22
PRDM1	8.19362	-22.1302	2.17587	-10.1708	2.67764e-24	9.73161e-22
PIEZO1	5.50499	-22.9478	2.25543	-10.1745	2.57839e-24	9.73161e-22
GBP5	57.6201	-24.8493	2.45645	-10.1159	4.69516e-24	1.64078e-21
CASP4	11.0332	-23.7529	2.36917	-10.0258	1.17366e-23	3.94959e-21
ACVR1	7.6057	25.5244	2.57263	9.92152	3.3562e-23	1.08909e-20
FOSL2	8.68438	-21.7995	2.20013	-9.90824	3.8334e-23	1.20104e-20
KAT8	4.11281	-22.3457	2.25648	-9.90294	4.04227e-23	1.22427e-20
UBE2R2	5.39037	21.1995	2.14358	9.88978	4.61062e-23	1.35136e-20
CD2	6.2044	-22.9056	2.32033	-9.87172	5.52081e-23	1.56757e-20
DIMT1	11.3901	23.243	2.38011	9.76554	1.58274e-22	4.35782e-20
IL2RG	13.8097	-19.8542	2.09073	-9.49628	2.17521e-21	5.81292e-19
USP15	2.73479	-28.855	3.09531	-9.32217	1.13988e-20	2.95912e-18
GINS3	0.88191	-42.6747	4.68555	-9.10772	8.41291e-20	2.12333e-17
PCNX1	9.90425	22.6036	2.52798	8.94135	3.84443e-19	9.44067e-17
CCL4	7.69184	-25.7235	2.90847	-8.84434	9.20734e-19	2.20152e-16
ZSWIM6	3.73099	21.2817	2.43427	8.74252	2.27972e-18	5.31117e-16
COL17A1	34.313	-14.1179	1.61727	-8.72946	2.55885e-18	5.81242e-16
OXSR1	8.32932	24.163	2.777	8.70114	3.28554e-18	7.28109e-16
CBFB	3.05179	-23.979	2.76492	-8.67257	4.22461e-18	9.13924e-16
SEMA3C	4.87147	-17.4534	2.07964	-8.39252	4.75829e-17	1.00544e-14
IL2RB	5.05034	-23.9368	2.86071	-8.36744	5.88852e-17	1.21598e-14
ATRN	4.78428	23.5346	2.81845	8.35019	6.81506e-17	1.37604e-14
MPEG1	4.93307	-20.0723	2.41352	-8.31659	9.05307e-17	1.78818e-14
F8A1	5.2918	24.0201	2.95837	8.11936	4.68636e-16	9.05963e-14
CSF1R	6.34606	22.2793	2.7487	8.10539	5.25749e-16	9.95198e-14
STAB1	5.76132	22.7055	2.84671	7.97605	1.51094e-15	2.80171e-13
SAMSN1	11.4631	22.8998	2.9155	7.85452	4.01303e-15	7.29247e-13
WDR13	2.28858	-20.0844	2.56029	-7.84456	4.34468e-15	7.74034e-13
TPSB2	15.0185	21.2679	2.78397	7.6394	2.18238e-14	3.81329e-12
HS2ST1	2.64968	-23.3646	3.179	-7.34967	1.98695e-13	3.40631e-11
MFNG	2.99872	-24.4459	3.36471	-7.26537	3.72012e-13	6.25945e-11
INTS14	1.77005	-24.88	3.44114	-7.23015	4.82473e-13	7.97045e-11
ST8SIA4	3.54394	18.0721	2.50246	7.22172	5.13349e-13	8.32909e-11
ACAP1	10.8339	21.1489	2.97576	7.10704	1.1856e-12	1.88988e-10
COL7A1	24.3576	-16.0739	2.32272	-6.92028	4.50746e-12	7.06117e-10
CXCL2	3.68434	-25.1506	3.72165	-6.75791	1.39994e-11	2.15591e-09
CXCL9	71.4133	-10.6372	1.57755	-6.74284	1.55319e-11	2.35204e-09
THBS2	6.92212	16.4013	2.49131	6.58339	4.59829e-11	6.84919e-09
CST7	3.26798	21.1808	3.24877	6.51964	7.04765e-11	1.03282e-08
C15orf48	2.66194	21.0524	3.248	6.48165	9.0726e-11	1.30847e-08
VAMP5	5.15978	-17.7289	2.74238	-6.46481	1.01429e-10	1.43997e-08
PPP3CB	8.41148	20.8703	3.23721	6.44701	1.14077e-10	1.59462e-08
CNRIP1	4.96458	28.853	4.64906	6.2062	5.42814e-10	7.47273e-08
CDK9	2.53241	20.0108	3.26087	6.13665	8.42773e-10	1.1429e-07
MIB1	1.50421	22.0449	3.61284	6.10181	1.04872e-09	1.40127e-07
MNDA	3.9542	-21.7042	3.60457	-6.02129	1.73032e-09	2.27851e-07
IFI27	12.4745	8.84384	1.47697	5.98781	2.12683e-09	2.76062e-07
CD83	1.05993	21.1797	3.59103	5.89796	3.68026e-09	4.7097e-07
ATF2	2.61273	18.6072	3.15901	5.89018	3.85767e-09	4.86817e-07
RNF138	2.59222	-18.8487	3.23239	-5.83119	5.5033e-09	6.84973e-07
IGLC3	177.402	-15.3417	2.71653	-5.64756	1.62743e-08	1.99822e-06
MALT1	1.72574	-20.9898	3.76609	-5.57336	2.49869e-08	3.02708e-06
ARHGEF1	24.7742	9.41132	1.76861	5.32131	1.03025e-07	1.23169e-05
PRF1	5.06487	-18.4378	3.47109	-5.3118	1.08546e-07	1.28084e-05
CCL2	9.11649	-11.1389	2.13079	-5.22761	1.71718e-07	2.00029e-05
SP100	867.416	1.05045	0.201721	5.20744	1.91465e-07	2.20209e-05
NR3C1	10.6314	-10.9332	2.12174	-5.15295	2.56421e-07	2.91231e-05
S100A4	45.8574	-6.69421	1.31031	-5.10886	3.24106e-07	3.63558e-05
COL11A1	23.8261	10.4555	2.07948	5.02793	4.95808e-07	5.4938e-05
MBNL1	29.8252	-7.35545	1.47042	-5.00229	5.66544e-07	6.20195e-05
C3	32.8065	-6.56409	1.31493	-4.99196	5.97685e-07	6.46496e-05
IGKC	317.892	-12.954	2.59632	-4.98937	6.05774e-07	6.47537e-05
ZKSCAN3	10.9919	6.38599	1.28887	4.95472	7.24351e-07	7.65285e-05
LY6E	12.9711	9.47998	1.92929	4.91372	8.93661e-07	9.33311e-05
TSC22D3	37.051	-5.59495	1.15027	-4.86402	1.15028e-06	0.000118766
TMEM123	19.7013	-6.13656	1.29471	-4.7397	2.14031e-06	0.000218504
FDPS	11.988	8.14735	1.7477	4.66176	3.13512e-06	0.000316507
NID1	7.91434	17.6685	3.88923	4.54294	5.54746e-06	0.000553893
ALDH2	19.6775	4.90805	1.08856	4.50874	6.52144e-06	0.000644063
APCDD1	14.9635	-6.93299	1.5495	-4.47435	7.6643e-06	0.000748794
RPS9	7.47984	7.15233	1.61744	4.42201	9.77877e-06	0.000945211
NKG7	9.82482	-8.07136	1.83002	-4.41053	1.03117e-05	0.000986237
TRIM8	6.58765	-6.93564	1.6152	-4.29399	1.75492e-05	0.00166096
TRIM33	22.1273	-8.24637	1.92644	-4.28062	1.86373e-05	0.00174576
PTPRC	24.3638	-7.53386	1.76504	-4.26839	1.9689e-05	0.00178894
COPA	16.0754	-7.96287	1.86505	-4.26951	1.95903e-05	0.00178894
IFIH1	2.403	-17.221	4.03161	-4.27148	1.94176e-05	0.00178894
INTS11	18.2252	9.64682	2.31145	4.17349	2.99967e-05	0.00269852
USP8	48.793	3.75786	0.908061	4.13834	3.49826e-05	0.00309458
TFEC	2.00464	-20.3063	4.90764	-4.1377	3.50805e-05	0.00309458
ZNF141	124.574	5.42038	1.31808	4.11233	3.91692e-05	0.00342203
GPR85	20.2326	1.1598	0.286209	4.05228	5.0721e-05	0.00438906
HELZ	12.5516	7.09699	1.77948	3.98824	6.6564e-05	0.00565234
ZMIZ1	6.29714	-9.03435	2.26439	-3.98974	6.61452e-05	0.00565234
F11R	8.0396	7.30711	1.83759	3.97647	6.99448e-05	0.00588443
SBF2	20.168	4.72165	1.2029	3.92523	8.66453e-05	0.00722256
LIAS	2.86211	-8.50661	2.17921	-3.90352	9.4803e-05	0.00783073
MYC	16.7828	-8.96947	2.32784	-3.85313	0.000116618	0.0095459
HHATL	9.45568	-8.92292	2.33073	-3.82838	0.000128992	0.0104644
PSCA	9.82336	-7.73453	2.02462	-3.82023	0.000133326	0.0107203
GIMAP5	8.20733	14.297	3.75787	3.80454	0.000142068	0.0113231
CD74	556.136	-2.56827	0.677229	-3.79232	0.000149244	0.0117915
TTC7B	16.4085	6.28305	1.66409	3.77566	0.000159584	0.0124998
MTO1	25.2605	4.7227	1.2525	3.77061	0.000162847	0.0126464
CIITA	22.6745	-6.10727	1.62371	-3.7613	0.000169031	0.0130154
USP47	4.91786	8.25482	2.23359	3.69576	0.000219231	0.0167389
CA5B	12.5178	-4.72887	1.2853	-3.6792	0.000233967	0.0177152
TRIM5	6.82236	7.62749	2.08016	3.66677	0.000245631	0.0182935
CNN2	14.5425	4.98162	1.35799	3.66837	0.000244104	0.0182935
IRF1	38.0201	-4.49073	1.22693	-3.66014	0.00025208	0.0186211
RPS25	54.8045	-3.22282	0.881675	-3.65534	0.000256842	0.0187525
RTTN	8.18504	-7.86106	2.15124	-3.6542	0.000257987	0.0187525
RNF19A	15.1155	-8.15647	2.23623	-3.64742	0.000264883	0.019101
TMSB4XP4	7.0662	-3.1001	0.85514	-3.62525	0.000288677	0.0206529
GJA1	10.6331	-6.97553	1.92753	-3.6189	0.000295855	0.0210011
RBM28	88.0705	4.94038	1.36958	3.60724	0.000309476	0.0217977
YIPF4	45.5137	-3.01773	0.842824	-3.58049	0.000342945	0.0239692
TNC	33.5545	-5.06864	1.41776	-3.57511	0.000350078	0.024281
PTRH1	2.24321	4.55236	1.27483	3.57095	0.000355693	0.0244203
BCL2A1	7.89035	-6.80673	1.90684	-3.56965	0.000357462	0.0244203
RARS2	5.57301	6.39852	1.79749	3.5597	0.00037128	0.025175
OR4F17	5.66915	-6.16817	1.74836	-3.52798	0.000418749	0.0281834
ANKRD54	3.66473	5.66664	1.61464	3.50954	0.000448884	0.0299894
NIBAN2	14.467	5.79075	1.65469	3.49961	0.000465945	0.0307567
SPATA5	4.82128	-6.0867	1.73959	-3.49892	0.000467138	0.0307567
KDM2B	6.11043	-7.02619	2.01471	-3.48745	0.000487653	0.0318763
NRDE2	19.2263	5.49683	1.57758	3.48435	0.000493339	0.0320177
C12orf45	583.986	-2.99273	0.86255	-3.46963	0.00052117	0.0333475
TNFAIP2	17.919	-6.65549	1.91811	-3.46982	0.000520804	0.0333475
NDUFA10	15.3349	5.5865	1.61882	3.45096	0.000558596	0.0354923
HGSNAT	6.26035	6.42629	1.86663	3.44273	0.00057588	0.0363364
ZBTB1	1.47575	-17.8266	5.18548	-3.4378	0.00058646	0.0367488
FKBP5	20.4299	-6.22285	1.81244	-3.43341	0.000596038	0.0370931
HOOK3	13.2417	3.76556	1.09962	3.42441	0.000616146	0.0380837
IGFBP2	20.6144	6.39953	1.86999	3.42223	0.000621106	0.0381309
OR5AS1	5.45396	-5.99344	1.75521	-3.41465	0.000638641	0.0389442
OR14J1	7.63754	-6.26058	1.85395	-3.37689	0.000733101	0.0444064
RNA5-8SP6	81.2668	2.43138	0.723985	3.35833	0.000784147	0.0471838
GBP4	42.6042	-5.03908	1.50713	-3.3435	0.000827285	0.049452
SIK1B	28.7594	6.20653	1.85824	3.34	0.000837784	0.0497523
PRAME	5.55052	8.37447	2.52369	3.31834	0.00090553	0.0534262
LPIN2	5.17943	-9.16989	2.76596	-3.31527	0.000915557	0.0536694
GMFG	9.87705	-7.85765	2.37472	-3.30887	0.000936733	0.0545587
HERC2P8	5.19831	6.49113	1.97311	3.2898	0.0010026	0.0576559
H3-3B	99.9072	-2.64017	0.802463	-3.29008	0.00100159	0.0576559
SESN3	8.85993	-7.7594	2.36165	-3.28558	0.00101771	0.0581566
CNDP1	2.80666	6.55143	1.99633	3.28173	0.00103171	0.058588
TNFRSF14	8.73081	6.86117	2.09536	3.27445	0.00105867	0.059013
ABHD18	4.97689	5.37099	1.63902	3.27696	0.00104933	0.059013
RNF168	2.42431	5.16031	1.57524	3.27588	0.00105334	0.059013
RPL21P16	1.20267	21.3497	6.54072	3.26412	0.00109806	0.0604977
TBK1	5.91602	-7.28283	2.23128	-3.26397	0.00109863	0.0604977
OR1A1	5.70451	-6.04037	1.85414	-3.25779	0.00112285	0.0614594
DYRK1A	10.5417	-6.13572	1.88745	-3.2508	0.0011508	0.0626115
ASPH	9.19371	5.72011	1.76222	3.24597	0.00117051	0.0633052
FSTL1	32.2011	5.22472	1.61573	3.23366	0.00122216	0.0657073
ITPRIPL2	3.91568	-5.43435	1.69833	-3.19983	0.00137511	0.0734954
UBR1	26.355	7.25392	2.27342	3.19075	0.00141904	0.0751439
ADGRV1	3.92893	-5.72849	1.79574	-3.19005	0.00142249	0.0751439
MARCHF8	1.16569	16.7301	5.25659	3.1827	0.00145911	0.0766326
IRAK4	5.04018	-5.06873	1.59354	-3.1808	0.00146871	0.0766939
SLC31A1	5.93114	3.84312	1.20894	3.17891	0.00147829	0.076753
PIGN	43.2571	-4.79527	1.51521	-3.16475	0.00155217	0.0801305
CNOT8	9.55807	-6.73527	2.13658	-3.15237	0.00161953	0.0831359
ST3GAL5	14.5526	-5.18817	1.65016	-3.14405	0.00166628	0.0850552
MAP2K6	30.2756	6.10246	1.94724	3.1339	0.00172502	0.0875616
MRRF	26.9635	9.481	3.03362	3.12531	0.00177619	0.0896581
YTHDC2	8.91661	6.72543	2.16086	3.11239	0.0018558	0.092647
WDFY3	6.03664	-9.53178	3.06171	-3.11322	0.00185058	0.092647
GRHPR	8.13494	5.87101	1.88756	3.11037	0.00186856	0.0927746
NCOA4	21.0507	-5.12789	1.65197	-3.10411	0.0019085	0.0942426
SLX1A	5.6788	6.32443	2.04913	3.0864	0.00202594	0.0994501
LIPH	1.48958	5.25623	1.70383	3.08495	0.00203585	0.0994501
CYP4V2	16.4453	4.66558	1.51853	3.07242	0.00212329	0.103167
TYMP	6.46934	-5.05233	1.64668	-3.06819	0.00215356	0.104081
DDT	3.18779	6.59672	2.15169	3.06583	0.00217065	0.104352
PIGT	19.3503	-5.01105	1.63592	-3.06314	0.00219031	0.104743
NNMT	5.07159	-6.05565	1.98142	-3.05622	0.00224143	0.106627
VASH1	2.50359	-9.31367	3.04938	-3.05428	0.00225598	0.10676
C4orf36	5.09486	5.40383	1.77199	3.04958	0.00229164	0.107885
SEMA4D	6.31499	-6.57461	2.16135	-3.0419	0.00235093	0.110106
PLXNA3	4.04858	5.10458	1.68096	3.0367	0.00239186	0.111448
FOXN3	7.57995	5.70831	1.89374	3.01431	0.00257564	0.119399
TMEM107	6.97487	5.66951	1.89568	2.99075	0.00278295	0.127707
ATF4	12.3212	3.88851	1.29982	2.99157	0.00277544	0.127707
VCPIP1	2.60294	6.05078	2.03037	2.98013	0.00288126	0.131553
RPL7P9	1.19831	19.4903	6.54596	2.97745	0.00290655	0.132044
SLAMF7	9.8346	-6.13205	2.06334	-2.97191	0.00295952	0.133782
SNIP1	7.21889	-5.59649	1.88567	-2.96791	0.00299835	0.134866
NFIA	8.82495	5.84407	1.98306	2.947	0.00320869	0.143616
YTHDF3	19.0249	5.02802	1.71556	2.93084	0.00338049	0.150565
NUP42	25.4681	6.18051	2.12269	2.91164	0.00359531	0.15803
CD3EAP	4.84673	5.06832	1.74069	2.91167	0.00359507	0.15803
OR2L2	2.57946	-6.06486	2.08328	-2.91121	0.0036003	0.15803
MRPL42	83.223	-3.97483	1.37005	-2.90123	0.00371701	0.162369
TMEM63B	2.74467	5.06706	1.74967	2.89602	0.00377934	0.162745
RPS17	30.9785	-4.35559	1.50271	-2.89849	0.00374968	0.162745
BIRC3	15.0967	-5.6422	1.94746	-2.89721	0.00376497	0.162745
RBPMS2	9.01293	5.36375	1.85461	2.89211	0.00382658	0.164002
ZC3H8	10.3028	-2.46506	0.854964	-2.88323	0.00393624	0.166475
ISY1	4.94017	-6.01637	2.08686	-2.88299	0.00393925	0.166475
CBL	4.51087	-6.89255	2.38913	-2.88496	0.00391459	0.166475
SRD5A1	18.8667	4.38449	1.52679	2.8717	0.00408272	0.171739
BICD2	5.32224	6.20934	2.16506	2.86798	0.00413108	0.17276
HLA-DMA	6.94401	-5.02985	1.75445	-2.86691	0.00414503	0.17276
HLA-F	2558.9	5.04834	1.76211	2.86494	0.00417083	0.173042
SPIB	2.66803	5.62525	1.9653	2.86229	0.00420597	0.173706
CICP27	4.85268	4.30301	1.50579	2.85765	0.00426787	0.173936
ACOT9	9.90462	4.28694	1.5002	2.85757	0.00426896	0.173936
OR7C1	4.14086	-5.72472	2.00205	-2.85944	0.00424392	0.173936
PCYT1A	6.83548	4.99054	1.74864	2.85396	0.00431783	0.174431
LAIR1	4.04116	4.72389	1.65528	2.85384	0.00431949	0.174431
FLT3LG	4.31013	4.79833	1.68913	2.84071	0.00450129	0.180171
C12orf50	24.8061	2.90335	1.02201	2.84082	0.00449983	0.180171
ZCCHC10	28.8446	8.08943	2.85256	2.83585	0.00457035	0.182132
RPL5	27.0143	-4.14565	1.46419	-2.83135	0.00463516	0.183909
ZFYVE21	8.51449	-3.36857	1.19085	-2.82872	0.00467351	0.184624
ZBTB37	3.33373	5.86509	2.0808	2.81868	0.00482222	0.189406
ELAVL1	31.0703	3.94525	1.40014	2.81774	0.00483626	0.189406
PBXIP1	7.6014	6.17923	2.19507	2.81505	0.00487697	0.190181
TM9SF4	8.67537	5.81506	2.07005	2.80914	0.00496734	0.192052
IL7R	16.1295	-5.78021	2.05864	-2.80778	0.00498837	0.192052
ITGBL1	1.71139	-15.1079	5.38033	-2.80799	0.00498516	0.192052
RIOK3	5.59151	5.41072	1.93257	2.79975	0.00511415	0.196064
CCDC25	6.3444	7.14921	2.55695	2.79599	0.00517414	0.196704
BNIP3L	16.9321	5.07409	1.81406	2.79709	0.00515647	0.196704
SLC43A2	4.91482	3.46242	1.24309	2.78534	0.00534717	0.201595
MAPK10	3.83273	-5.8244	2.09094	-2.78554	0.00534387	0.201595
WIZ	6.50251	-6.61816	2.38194	-2.77847	0.00546157	0.205057
UBE2J1	15.4675	-5.84138	2.10869	-2.77014	0.00560322	0.20951
SZT2	6.70578	5.20627	1.88423	2.76307	0.00572596	0.213222
NANS	49.9877	4.35611	1.57768	2.76109	0.00576092	0.213648
OR10K1	2.53574	-5.72448	2.07884	-2.75369	0.00589284	0.217652
EPB41	3.54957	-4.78067	1.73775	-2.75107	0.00594002	0.218506
STK17B	12.7464	-5.26485	1.91511	-2.74911	0.00597574	0.218934
DNAJC5	4.15093	6.76787	2.46429	2.74638	0.00602565	0.219876
TP53INP1	8.32472	6.99565	2.55289	2.74029	0.00613847	0.221044
MAU2	10.9103	5.76191	2.10298	2.73988	0.00614623	0.221044
OAS1	26.3916	5.74611	2.09757	2.73941	0.00615497	0.221044
CTIF	1.34674	4.48752	1.63693	2.74142	0.00611735	0.221044
KDM3A	5.03613	6.59679	2.40979	2.7375	0.00619078	0.221454
DR1	23.5629	-3.88423	1.42092	-2.7336	0.0062647	0.22322
FLAD1	11.0477	-6.51261	2.38439	-2.73135	0.00630746	0.223866
CRLF3	6.01584	5.93378	2.1747	2.72855	0.00636137	0.224029
TTC3	40.0057	3.11569	1.1415	2.72947	0.00634363	0.224029
PLEKHF2	2.72274	-6.82713	2.50443	-2.72602	0.00641025	0.224878
ATAD3B	6.80628	5.9407	2.18524	2.71855	0.00655681	0.229135
RPS6P20	3.4852	-3.74778	1.38011	-2.71557	0.00661617	0.230324
ZFX	2.50914	6.46297	2.38348	2.71157	0.00669659	0.231991
GABPB2	9.98277	2.98126	1.10008	2.71005	0.00672722	0.231991
IL10RA	9.51513	-5.5313	2.04153	-2.70939	0.00674066	0.231991
XPO7	2.88879	-7.20595	2.66336	-2.70559	0.00681841	0.233781
MS4A7	8.21483	-5.73199	2.12704	-2.69482	0.00704275	0.240565
SULT1C2	8.31117	-5.8715	2.18608	-2.68586	0.00723441	0.246187
NFKB2	5.44966	-4.98811	1.859	-2.68323	0.00729151	0.247204
CYB5R1	6.39872	7.14992	2.67499	2.67287	0.00752043	0.249382
DMXL1	3.47743	6.78613	2.53496	2.67702	0.00742796	0.249382
TIMM10B	1.35466	6.04163	2.25631	2.67767	0.00741371	0.249382
NET1	7.76158	5.52936	2.06769	2.67417	0.00749147	0.249382
ADCY2	4.25971	5.39182	2.01656	2.67378	0.00750025	0.249382
ADAM17	5.90765	-4.7625	1.78111	-2.67389	0.00749778	0.249382
SHKBP1	2.33497	6.21807	2.33474	2.66328	0.00773824	0.251106
HMGCS1	2.03761	5.70223	2.13997	2.66463	0.00770728	0.251106
SLC44A1	4.93548	5.28201	1.98084	2.66655	0.0076634	0.251106
TTC19	16.6147	-3.91191	1.46875	-2.66342	0.007735	0.251106
RANBP2	3.4351	-5.59238	2.09539	-2.66889	0.00761017	0.251106
EEA1	5.49129	-7.12273	2.67364	-2.66406	0.00772032	0.251106
C21orf62	4.65081	3.51227	1.32202	2.65675	0.00788977	0.255112
CTSS	39.0224	-3.25586	1.22801	-2.65132	0.00801769	0.258329
TRAF4	2.18335	6.44968	2.43667	2.64693	0.0081227	0.258505
FAXC	16.0154	6.30401	2.38207	2.64644	0.00813431	0.258505
LSP1	9.69783	4.68038	1.76863	2.64633	0.00813697	0.258505
GAPDHS	7.35066	-4.69996	1.77505	-2.6478	0.00810185	0.258505
HERC4	25.4832	3.10515	1.17626	2.63985	0.00829424	0.261388
TOMM20	55.6985	-3.25886	1.23381	-2.6413	0.00825894	0.261388
SLC30A5	18.7847	-3.86848	1.46586	-2.63904	0.00831402	0.261388
RDH13	3.54026	6.67716	2.53346	2.63559	0.00839918	0.261664
KIAA0319L	8.16455	4.51996	1.71524	2.63518	0.00840917	0.261664
NAV1	9.2706	3.8538	1.46116	2.6375	0.00835203	0.261664
GBP2	32.5057	-4.34837	1.65156	-2.63289	0.00846617	0.262538
MGP	19.084	6.64313	2.52814	2.62768	0.00859703	0.265689
ACOX1	34.5036	5.07559	1.93272	2.62614	0.00863596	0.265988
FGF13	28.5756	3.98434	1.51956	2.62204	0.00874043	0.268296
SUSD6	9.44411	4.92	1.87908	2.61831	0.00883666	0.270336
ZNF286A	4.00873	7.34391	2.81973	2.60448	0.0092015	0.280079
NDUFA12	6.79001	-4.84625	1.86115	-2.60391	0.00921678	0.280079
SORBS3	5.81401	5.40656	2.08063	2.59851	0.00936282	0.281786
USP49	3.05435	5.08864	1.95838	2.5984	0.00936599	0.281786
TTPAL	4.81255	3.54096	1.36246	2.59895	0.00935107	0.281786
LIMD1	4.25278	5.66215	2.18737	2.58856	0.0096378	0.288919
RSRP1	31.765	-3.33038	1.28709	-2.58753	0.00966667	0.288919
TGFBI	41.4334	-3.57548	1.3846	-2.58233	0.00981356	0.292347
PLPP5	6.259	-6.57155	2.547	-2.58011	0.00987683	0.293271
SEPTIN7P2	2.02212	-6.63542	2.5731	-2.57876	0.0099156	0.293463
PDE3B	11.5531	2.91196	1.13092	2.57486	0.0100279	0.295234
NECAP2	12.9632	-5.19294	2.01712	-2.57443	0.0100404	0.295234
FAM161A	1.56375	4.43606	1.72396	2.57317	0.0100771	0.295357
BRWD1	2.55716	5.25213	2.04414	2.56936	0.0101887	0.297667
GPR174	3.08246	-5.33328	2.08181	-2.56184	0.0104118	0.30321
UBR4	18.6393	4.71625	1.84335	2.55852	0.0105119	0.305147
MT-ATP8	45.6088	1.95089	0.763573	2.55495	0.0106202	0.307309
GLRX	31.5255	4.54369	1.77971	2.55305	0.0106784	0.308014
POLR2J3	25.2143	3.98008	1.56134	2.54914	0.010799	0.309525
JPT1	4.01936	-5.31148	2.08283	-2.55013	0.0107683	0.309525
CAMTA1	14.3816	5.98214	2.35221	2.5432	0.0109842	0.311882
CEBPZOS	68.2041	1.5799	0.621163	2.54345	0.0109765	0.311882
TRRAP	7.6782	-4.4075	1.73259	-2.54387	0.0109632	0.311882
PTK7	7.57973	3.91284	1.53969	2.54132	0.0110435	0.312589
PDHB	6.69765	4.89576	1.92822	2.539	0.0111169	0.313667
TMEM19	13.6162	-4.80698	1.89405	-2.53794	0.0111506	0.313667
TNFRSF10B	5.91547	-5.12269	2.02306	-2.53215	0.0113366	0.317916
SLCO2A1	1.75165	4.65744	1.84516	2.52413	0.0115984	0.324256
CDC42EP3	30.0044	-3.75871	1.49033	-2.52207	0.0116666	0.325163
FBXW4	5.26009	7.06745	2.80814	2.51678	0.0118434	0.328326
DBP	2.479	5.67239	2.25599	2.51437	0.0119247	0.328326
FRMD6	2.95523	5.51223	2.19123	2.51559	0.0118834	0.328326
CCDC69	3.19496	-5.54652	2.20508	-2.51534	0.0118918	0.328326
YAP1	15.6741	4.65382	1.85191	2.51298	0.0119715	0.32862
BAZ1A	7.86143	5.20649	2.07664	2.50717	0.0121701	0.330731
PPP1R12B	24.4693	4.80273	1.91532	2.50754	0.0121576	0.330731
PCSK5	97.6026	2.1389	0.853348	2.50648	0.012194	0.330731
SOD2	1051.12	-1.58691	0.632491	-2.50899	0.0121077	0.330731
TCHP	3.2863	5.15892	2.06394	2.49955	0.0124353	0.335273
TUBB4B	10.6634	-4.43322	1.7732	-2.50012	0.0124152	0.335273
RBM20	2.88888	5.39402	2.1617	2.49527	0.0125861	0.338022
KLC1	46.9893	-4.14764	1.66268	-2.49455	0.0126116	0.338022
BLVRB	3.29394	6.54554	2.62996	2.48884	0.0128161	0.342493
SCLY	3.97618	5.05638	2.03484	2.4849	0.0129588	0.342562
GBA2	2.31345	4.98532	2.00933	2.48108	0.0130986	0.342562
TUBD1	5.69583	4.85143	1.95584	2.48049	0.0131204	0.342562
RND1	3.55817	4.22389	1.70249	2.48101	0.0131012	0.342562
MTND1P23	163.189	1.46193	0.58867	2.48345	0.0130118	0.342562
PPP1CB	25.4022	-3.38961	1.36526	-2.48275	0.0130372	0.342562
RPS7	59.8938	-3.44467	1.38491	-2.48729	0.0128719	0.342562
ADI1	5.02261	-4.84472	1.95263	-2.48113	0.0130967	0.342562
SUPV3L1	14.9064	5.60569	2.26701	2.47272	0.013409	0.349021
DMKN	91.852	-3.17563	1.28476	-2.47177	0.0134446	0.349021
FLNA	28.1108	3.08639	1.2499	2.46931	0.0135372	0.34943
POLK	5.97094	-5.18184	2.09771	-2.47024	0.0135022	0.34943
TAX1BP3	3.76163	5.21196	2.11282	2.46683	0.0136316	0.349879
FBXO22	19.1393	-3.95215	1.60212	-2.46683	0.0136314	0.349879
RALGPS2	6.49001	4.61418	1.87681	2.45852	0.0139512	0.355981
PLP2	5.68474	4.51162	1.83654	2.45659	0.0140261	0.355981
POM121	3.41057	4.43308	1.8035	2.45804	0.0139697	0.355981
TYROBP	13.2738	-3.86279	1.57232	-2.45674	0.0140204	0.355981
KLHDC2	11.001	6.20716	2.52915	2.45424	0.0141182	0.357321
SSBP3	8.83335	-4.7658	1.94321	-2.45254	0.0141851	0.358017
RAC2	7.41607	-4.56714	1.86484	-2.44908	0.0143223	0.360477
SAMD8	3.32765	6.33235	2.58868	2.44617	0.0144383	0.362393
STAP2	5.22713	3.72317	1.52464	2.44201	0.0146059	0.365591
NDST1	1.48141	5.54995	2.27862	2.43566	0.0148645	0.367239
DST	74.3058	3.07731	1.26346	2.43561	0.0148666	0.367239
ATP10B	3.36741	-4.31846	1.77318	-2.43544	0.0148739	0.367239
RSF1	21.5569	-5.548	2.27577	-2.43785	0.0147748	0.367239
CEP95	3.08296	-6.42887	2.63864	-2.43643	0.0148329	0.367239
FMNL1	6.36494	5.46237	2.24594	2.43211	0.0150111	0.36945
ERCC4	16.5915	3.71622	1.52911	2.43032	0.0150854	0.36945
ZNF345	7.84678	-5.75801	2.3685	-2.43108	0.0150538	0.36945
C8orf34	4.08449	4.03795	1.66309	2.42797	0.0151834	0.37085
FAM210A	3.59675	-7.4224	3.05855	-2.42677	0.0152339	0.371086
CHRNA7	2.15326	5.74471	2.36929	2.42465	0.015323	0.372258
PTGFRN	15.8832	5.82376	2.40823	2.41827	0.0155944	0.375838
ANKZF1	12.2536	5.33179	2.20395	2.4192	0.0155547	0.375838
ACTB	263.298	-1.20074	0.496147	-2.42013	0.015515	0.375838
GUSBP3	2.13196	5.63482	2.33327	2.41499	0.0157356	0.376245
TRIM47	7.8361	-5.60222	2.31902	-2.41578	0.0157017	0.376245
OR2M3	2.45661	-6.10966	2.52928	-2.41558	0.0157104	0.376245
FKBP10	6.52312	2.97512	1.23504	2.40891	0.0160001	0.381566
NFKB1	10.1739	-6.02799	2.50534	-2.40606	0.0161257	0.383554
FBXW2	11.2118	3.748	1.55941	2.40347	0.0162401	0.384509
BAG3	7.59947	-5.66832	2.35862	-2.40324	0.0162504	0.384509
C12orf60	1.19947	4.92606	2.05083	2.40199	0.0163062	0.384827
TXLNGY	6.28711	-6.32716	2.63803	-2.39844	0.0164652	0.387572
DENND2C	3.99644	4.69517	1.96152	2.39364	0.0166823	0.390669
BPTF	31.9081	4.2645	1.78199	2.39311	0.016706	0.390669
IRF4	5.1999	-5.68273	2.37505	-2.39268	0.0167258	0.390669
FERMT3	5.15615	-5.59717	2.3411	-2.39083	0.0168105	0.391641
TOPBP1	3.48332	-6.89036	2.88415	-2.38904	0.0168924	0.392543
SCIMP	2.49666	3.59863	1.5079	2.38652	0.0170088	0.392883
EIF1AX	28.1733	-3.83982	1.60872	-2.38687	0.0169924	0.392883
COL5A2	3.9557	-5.16884	2.1664	-2.38591	0.0170368	0.392883
FTL	160.543	-1.58313	0.66423	-2.3834	0.0171534	0.394571
PRKCE	4.91732	7.75119	3.2618	2.37635	0.0174848	0.400168
DCAF10	11.1981	-4.11049	1.72964	-2.3765	0.0174779	0.400168
TCOF1	14.3061	3.9397	1.66	2.37332	0.0176291	0.402457
DOCK10	3.90636	6.07838	2.56594	2.36887	0.0178427	0.404456
PLCD3	1.85942	4.26172	1.79987	2.36779	0.0178947	0.404456
ZNF605	7.22972	4.13137	1.74415	2.3687	0.0178505	0.404456
ID2	22.2042	-4.24398	1.79197	-2.36833	0.0178686	0.404456
DCUN1D1	7.92791	7.29737	3.0846	2.36574	0.0179941	0.404651
CALCOCO1	6.3356	-3.98858	1.6866	-2.36486	0.018037	0.404651
MRPS26	2.531	-5.74634	2.42835	-2.36636	0.0179642	0.404651
DAZAP2	57.8731	-2.77536	1.1746	-2.36282	0.0181367	0.405887
PHF6	3.69641	5.38611	2.28263	2.3596	0.0182944	0.40766
PDS5A	10.0031	-4.16795	1.76655	-2.35938	0.0183057	0.40766
RAB5A	5.60827	6.60198	2.79962	2.35817	0.0183654	0.40799
TNFAIP8L1	11.4625	4.2927	1.82292	2.35484	0.0185306	0.410656
EDEM3	2.50035	6.06738	2.58223	2.34966	0.0187905	0.414395
CHFR	14.3704	-4.16258	1.77107	-2.35033	0.018757	0.414395
MPDU1	2.61307	3.72632	1.58738	2.34747	0.0189014	0.41583
RFWD3	4.14357	5.09052	2.17043	2.34539	0.019007	0.417144
C19orf47	3.45846	5.49498	2.34497	2.34331	0.0191136	0.417545
GABBR1	2.16236	-4.94008	2.10823	-2.34324	0.0191172	0.417545
RAD9A	9.72401	-2.5336	1.08184	-2.34195	0.0191835	0.417989
CLK4	7.1963	4.39153	1.87729	2.33929	0.0193204	0.41864
ICA1L	3.10258	-3.11333	1.33123	-2.33869	0.0193516	0.41864
CHD4	19.2797	-3.51355	1.50158	-2.3399	0.019289	0.41864
CNOT6	7.97086	7.10765	3.04059	2.33759	0.0194087	0.418878
PYGO1	3.33786	7.78759	3.3332	2.33637	0.019472	0.419067
CASP8	12.6047	-2.98546	1.27871	-2.33473	0.0195573	0.419067
USP4	4.37775	-3.92725	1.68271	-2.33388	0.019602	0.419067
PLEKHM2	3.8719	-6.1249	2.62408	-2.33412	0.0195895	0.419067
ARPIN	19.1039	-3.38162	1.45131	-2.33005	0.0198037	0.422386
SETD2	6.16002	5.98935	2.57419	2.32669	0.0199815	0.42457
LAT	7.72903	5.83017	2.50689	2.32566	0.0200368	0.42457
HAUS3	2.09415	-3.92106	1.68613	-2.32548	0.0200463	0.42457
SLFN5	5.62021	-5.08123	2.18841	-2.32188	0.0202394	0.427663
AXL	1.68722	3.02097	1.30316	2.31819	0.020439	0.43067
FAM153CP	6.45691	-3.66195	1.58072	-2.31663	0.0205239	0.43067
APOL3	3.88693	-4.87705	2.10519	-2.31668	0.020521	0.43067
FAM221A	31.9661	-2.81129	1.215	-2.31382	0.0206777	0.432898
GLTP	15.7745	2.88886	1.2496	2.31183	0.0207872	0.433475
FAM174A	6.48566	-6.28724	2.71988	-2.31158	0.0208007	0.433475
PHC2	10.2612	4.14806	1.79748	2.30771	0.0210154	0.436948
RTP4	5.18829	7.92751	3.44297	2.30252	0.0213058	0.441488
HSPB2	1.98391	6.83598	2.96949	2.30207	0.021331	0.441488
WWC1	1.57253	5.98993	2.60297	2.30119	0.0213812	0.441521
GTF2H3	6.37518	4.82294	2.09909	2.29764	0.0215824	0.444667
ZBTB8A	6.49111	2.3824	1.03748	2.29634	0.0216565	0.445183
AP5S1	4.36141	4.91212	2.14051	2.29483	0.0217427	0.445946
LIG3	3.93375	4.4061	1.92087	2.29381	0.0218016	0.446146
MOCOS	1.49232	4.68467	2.04864	2.28672	0.0222119	0.452506
WAPL	5.90857	-5.85846	2.56119	-2.28739	0.0221728	0.452506
MTERF3	3.79063	7.35427	3.22585	2.27979	0.02262	0.454485
MEX3C	4.78865	6.46427	2.83892	2.27702	0.0227852	0.454485
ABHD17B	4.87633	5.40627	2.37468	2.27663	0.0228085	0.454485
RCSD1	2.24675	4.94273	2.16775	2.28012	0.0226007	0.454485
IRF2BPL	10.4942	4.83088	2.1197	2.27904	0.0226645	0.454485
TNS2	1.05414	4.6004	2.01739	2.28037	0.0225859	0.454485
ZNF527	3.50287	4.4455	1.95045	2.27922	0.0226541	0.454485
GK5	15.6953	3.91725	1.71905	2.27872	0.0226836	0.454485
FGFR1	14.7486	3.77721	1.65486	2.2825	0.0224596	0.454485
RPSA	56.1508	-1.91339	0.840453	-2.27661	0.0228093	0.454485
HIF3A	1.02784	5.55273	2.44225	2.27361	0.0229893	0.457069
SDE2	10.4942	-4.29982	1.89489	-2.26916	0.0232585	0.461411
TCF7	5.43316	4.76024	2.09903	2.26782	0.02334	0.46202
LSM5	18.6594	-4.173	1.84231	-2.2651	0.0235068	0.464311
CIDECP1	1.34062	4.17757	1.85016	2.25795	0.0239487	0.471162
C2orf92	3.93491	4.02211	1.78142	2.25781	0.0239574	0.471162
MS4A4E	1.78103	-4.89387	2.17126	-2.25393	0.0242006	0.474918
CCR6	2.81233	4.82698	2.14464	2.25072	0.0244033	0.477752
STEAP4	9.14078	3.89308	1.7309	2.24917	0.0245017	0.477752
ISG20L2	9.76856	3.41858	1.51994	2.24915	0.0245028	0.477752
TMEM176B	5.44692	-5.25986	2.34428	-2.2437	0.0248515	0.483514
TMEM199	2.24014	6.11668	2.73067	2.23999	0.0250914	0.4861
PSMD9	8.37529	2.70783	1.20867	2.24034	0.0250691	0.4861
FAM214B	2.1871	5.65439	2.52647	2.23806	0.0252173	0.487499
DLG4	0.860669	-4.50298	2.01286	-2.23711	0.0252795	0.487663
GMPR	15.3911	4.03993	1.80793	2.23456	0.0254464	0.488807
TRIP12	5.0844	-4.18556	1.87304	-2.23464	0.0254413	0.488807
TMEM106A	1.55716	4.62961	2.07482	2.23133	0.0256591	0.491853
HEMK1	11.3498	-3.145	1.41032	-2.22999	0.0257479	0.492517
DEPDC5	1.41027	-3.70556	1.66257	-2.22882	0.025826	0.492973
CEP76	1.84386	3.70116	1.66268	2.22601	0.0260132	0.495505
FOXP1	11.3241	-3.83973	1.72599	-2.22465	0.0261048	0.496209
SPOUT1	3.74049	6.6933	3.01124	2.22277	0.0262312	0.497433
GON4L	6.64047	-4.70239	2.11622	-2.22207	0.0262786	0.497433
PPP1R7	2.20484	6.38069	2.88437	2.21216	0.0269557	0.499468
PPM1M	5.23392	5.18437	2.33703	2.21836	0.0265305	0.499468
TMEM67	4.95086	5.09131	2.30159	2.21209	0.0269607	0.499468
PLIN2	3.14505	4.98546	2.25418	2.21165	0.0269908	0.499468
ZNF587	8.24408	4.48348	2.0204	2.21911	0.0264795	0.499468
SYNE2	25.6585	2.93583	1.32635	2.21347	0.0268655	0.499468
MT2A	104.495	-1.64663	0.743121	-2.21583	0.0267034	0.499468
AHNAK	75.6154	-2.24871	1.01488	-2.21573	0.0267101	0.499468
PSME2	23.254	-2.75985	1.24586	-2.21521	0.0267456	0.499468
SNAP23	31.6999	-3.93332	1.77669	-2.21384	0.0268397	0.499468
CD68	8.16691	-4.3993	1.98713	-2.21389	0.0268362	0.499468
NREP	2.79495	6.34269	2.87328	2.20748	0.0272809	0.503809
HLA-V	31.2492	-2.06679	0.937228	-2.20522	0.027439	0.504677
ITGAL	3.6529	-4.76785	2.16187	-2.20543	0.0274239	0.504677
PIK3C3	20.2898	4.21659	1.9165	2.20016	0.0277958	0.510207
SCAMP3	2.94383	7.09614	3.23023	2.19679	0.0280355	0.510553
ZCCHC3	3.68396	6.98726	3.18657	2.19272	0.0283275	0.510553
BAG4	5.78009	6.10392	2.77624	2.19863	0.0279045	0.510553
MRPL9	5.73745	5.21539	2.37514	2.19583	0.0281042	0.510553
YIPF5	2.10014	4.43365	2.02235	2.19233	0.028356	0.510553
CDK2AP2	2.75181	4.21225	1.9199	2.194	0.0282358	0.510553
ZNF548	1.92359	4.20117	1.91626	2.19238	0.028352	0.510553
PAWR	24.4439	4.09283	1.86518	2.19433	0.0282116	0.510553
MYO1C	3.7	-4.50223	2.0539	-2.19204	0.0283765	0.510553
SAP25	2.21019	-6.0448	2.75505	-2.19408	0.0282296	0.510553
EXOSC1	2.20225	5.77111	2.63908	2.18679	0.0287579	0.516391
TM7SF3	23.2197	-2.75975	1.26321	-2.18472	0.0289095	0.51809
SQLE	5.51768	6.2264	2.85207	2.18312	0.0290272	0.518971
LYZ	102.39	-2.17112	0.994787	-2.1825	0.0290729	0.518971
ENOSF1	3.97009	3.58855	1.64547	2.18087	0.0291932	0.519458
RNF149	8.5931	-4.96864	2.27859	-2.18058	0.0292145	0.519458
DHRS1	2.30471	5.14699	2.36137	2.17966	0.0292826	0.519652
STARD3	2.20971	5.12649	2.35726	2.17476	0.029648	0.522506
GOLGA8B	7.2981	4.88992	2.25567	2.16783	0.0301715	0.522506
BET1	9.67984	4.71176	2.17219	2.16913	0.0300728	0.522506
ZNF3	8.00134	4.08353	1.87887	2.1734	0.0297505	0.522506
RNF227	2.67089	3.58928	1.65094	2.17408	0.0296992	0.522506
NANOG	1.13339	3.28238	1.51484	2.16682	0.0302485	0.522506
TLCD2	8.8434	2.62508	1.2074	2.17417	0.0296923	0.522506
IRGQ	8.56066	2.61756	1.20724	2.16823	0.0301414	0.522506
CFL1	104.835	-1.55054	0.715452	-2.16721	0.0302186	0.522506
XAF1	64.9402	-2.45566	1.13266	-2.16805	0.0301546	0.522506
LIN52	2.31028	-2.97835	1.37286	-2.16944	0.030049	0.522506
FOXO3	9.22092	-3.70389	1.70556	-2.17165	0.0298817	0.522506
HYOU1	3.31345	-4.23213	1.95307	-2.16691	0.0302419	0.522506
WDR33	13.1165	-4.33561	1.99979	-2.16804	0.030156	0.522506
TBC1D17	3.88887	-3.99642	1.84523	-2.16581	0.0303253	0.522839
SCYL2	6.40897	6.15474	2.85135	2.15854	0.030886	0.52672
NIPSNAP1	1.77219	5.12352	2.37093	2.16097	0.0306975	0.52672
RIPOR1	3.6265	4.95324	2.29294	2.16021	0.0307562	0.52672
METTL7A	4.5024	4.53719	2.10285	2.15763	0.0309562	0.52672
RTL10	1.95492	4.25372	1.96939	2.15992	0.030779	0.52672
RBM34	8.9985	3.35514	1.55486	2.15784	0.0309404	0.52672
SLC16A3	1.63944	-4.67856	2.16626	-2.15975	0.0307924	0.52672
ZNF500	3.65362	3.94988	1.83179	2.15629	0.0310607	0.52751
PLA2G4E	1.43741	4.87317	2.26175	2.1546	0.0311934	0.528552
ZMYM3	17.1299	2.59383	1.20456	2.15333	0.0312924	0.528552
LEPROTL1	14.2206	-4.79992	2.22912	-2.15328	0.0312966	0.528552
SLC12A2	4.1068	5.73524	2.66917	2.1487	0.0316585	0.53205
TMED5	16.6938	3.76914	1.75437	2.14843	0.0316794	0.53205
APOBEC3G	17.752	-4.43724	2.06505	-2.14873	0.0316562	0.53205
OR1I1	0.900028	-3.53302	1.64653	-2.14573	0.0318947	0.534678
VPS4B	8.61442	3.31008	1.54335	2.14474	0.0319739	0.535017
BCAP29	3.14511	-3.60343	1.68163	-2.14282	0.0321279	0.536606
PNP	2.18571	5.6783	2.6581	2.13622	0.0326612	0.539953
MGLL	14.3315	4.08686	1.91287	2.13651	0.0326378	0.539953
TRIM56	40.2136	2.36035	1.10507	2.13593	0.0326848	0.539953
FKBP2	6.71901	-2.80234	1.31172	-2.13639	0.0326472	0.539953
CASR	4.21084	-5.10588	2.38922	-2.13705	0.032594	0.539953
PCGF5	19.2394	-5.95977	2.78668	-2.13866	0.0324632	0.539953
NPIPB4	18.4594	3.06648	1.4376	2.13306	0.03292	0.542852
SNX24	2.21143	7.56644	3.54864	2.13221	0.0329898	0.543018
SLFN12L	6.66972	5.63691	2.64766	2.12902	0.0332527	0.545369
EEF1A1	740.369	-0.719148	0.337736	-2.12932	0.0332277	0.545369
TRIM13	7.20559	4.71184	2.21436	2.12785	0.0333494	0.545968
WDR74	39.3414	-2.18598	1.02786	-2.12673	0.0334422	0.546504
NMNAT3	52.9487	-3.45785	1.62882	-2.12291	0.0337614	0.549979
MRPL27	6.15526	-6.03256	2.84188	-2.12274	0.0337759	0.549979
BBS5	31.8421	3.13039	1.47896	2.11662	0.0342921	0.557385
PLEKHO1	2.87206	-3.92554	1.857	-2.11391	0.0345228	0.558355
SERPINB1	5.63378	-3.97563	1.88013	-2.11455	0.0344683	0.558355
ZC3H6	1.48682	-4.4563	2.10824	-2.11376	0.0345362	0.558355
SAP18	50.5957	-3.65886	1.73303	-2.11125	0.0347507	0.560825
ZNF160	3.89983	4.68669	2.22213	2.1091	0.0349357	0.562811
PSMA4	15.8841	-2.86209	1.35798	-2.10761	0.0350646	0.563888
TLR3	0.994423	4.88587	2.3192	2.1067	0.0351432	0.564154
TOMM70	9.72877	-5.00907	2.37926	-2.10531	0.0352645	0.565102
HELLS	3.20591	4.06202	1.93222	2.10226	0.0355305	0.565376
CCAR1	19.2438	3.35017	1.59333	2.10262	0.0354993	0.565376
MPPE1	11.3984	-3.8601	1.83596	-2.1025	0.0355095	0.565376
CTCF	1.35431	-4.77021	2.2683	-2.10299	0.035467	0.565376
LYRM7	9.23744	2.87912	1.37145	2.09933	0.035788	0.568479
HAPLN4	1.62082	4.18539	1.99599	2.09689	0.0360029	0.570894
NCOA1	5.18345	6.42694	3.07732	2.08848	0.0367541	0.571817
CIZ1	1.5814	6.10486	2.92504	2.0871	0.0368792	0.571817
FAM162A	1.90161	4.87942	2.33385	2.09072	0.0365533	0.571817
MAN1A2	3.95279	4.74678	2.27271	2.0886	0.0367439	0.571817
GALNT16	2.26005	4.48737	2.14752	2.08956	0.036657	0.571817
SERPINB5	17.1339	3.67801	1.75854	2.09151	0.0364822	0.571817
CAPNS1	9.60327	3.38474	1.61867	2.09107	0.036522	0.571817
QKI	14.8641	3.11592	1.49282	2.08727	0.0368641	0.571817
KIAA0930	65.2943	3.02673	1.44887	2.08902	0.0367055	0.571817
RPS6	84.0588	1.32646	0.633753	2.09302	0.0363474	0.571817
NACA	74.8202	-1.82554	0.874165	-2.08833	0.0367685	0.571817
RPL10A	42.9691	-1.83228	0.875968	-2.09172	0.036464	0.571817
WRNIP1	3.62611	-6.21343	2.96831	-2.09325	0.0363266	0.571817
SLC25A45	3.07317	4.43531	2.12674	2.0855	0.0370239	0.573082
NMT2	13.1672	-2.51192	1.20506	-2.08447	0.037117	0.573546
BCAN	9.48662	5.32164	2.55529	2.0826	0.0372878	0.575208
RSL24D1	10.6083	4.66224	2.24022	2.08115	0.0374201	0.57627
COPS8	10.2637	-3.81319	1.83323	-2.08004	0.0375215	0.576854
SFXN2	4.66079	4.5112	2.1702	2.0787	0.0376447	0.577086
RAB11FIP1	8.78805	3.97938	1.9158	2.07714	0.0377884	0.577086
GPX4	24.6899	-2.8649	1.37903	-2.07747	0.0377583	0.577086
UBAP1L	1.45513	-6.06854	2.92161	-2.07712	0.0377907	0.577086
ZYX	7.12801	-3.65033	1.75837	-2.07598	0.037896	0.577724
ALOX12P2	1.47649	4.55147	2.1937	2.07479	0.0380057	0.577923
HDAC9	3.24689	-6.53593	3.15066	-2.07446	0.0380363	0.577923
PARD6B	0.882839	-4.15008	2.00157	-2.07342	0.0381335	0.578432
PGBD4	4.05309	2.99965	1.44779	2.07188	0.0382767	0.579637
RCN2	59.5184	-2.02025	0.976091	-2.06973	0.0384774	0.579777
P4HA2	5.53753	-3.37844	1.63202	-2.07009	0.0384437	0.579777
KLRK1	10.7496	-4.85055	2.34239	-2.07077	0.0383801	0.579777
KAT6B	3.13658	-3.386	1.63668	-2.06881	0.0385636	0.580113
ADO	3.43643	7.45446	3.61015	2.06486	0.0389362	0.58371
KIAA2026	9.66218	6.72202	3.26176	2.06086	0.0393166	0.58371
TRPV1	5.13984	4.92811	2.38974	2.0622	0.039189	0.58371
ETS1	27.3162	3.08425	1.49448	2.06376	0.0390405	0.58371
SPTAN1	40.8597	3.02094	1.46568	2.06111	0.0392923	0.58371
LDLR	12.7884	2.58639	1.25354	2.06327	0.0390873	0.58371
SBK1	1.09162	-2.33089	1.13049	-2.06184	0.0392232	0.58371
SUCLA2	2.5836	-5.79327	2.8103	-2.06144	0.0392612	0.58371
RAB6A	17.5812	3.60075	1.7478	2.06016	0.0393836	0.583751
GPR153	2.22784	5.00047	2.43649	2.05233	0.0401379	0.588474
FKBP11	9.99932	4.74493	2.31199	2.05232	0.0401388	0.588474
GPAA1	4.96086	4.34727	2.11841	2.05213	0.0401568	0.588474
CTNND1	95.6142	2.09405	1.01984	2.05332	0.0400411	0.588474
FXYD3	20.3459	-3.30418	1.6077	-2.05523	0.0398569	0.588474
MALSU1	15.4205	-3.61152	1.75649	-2.0561	0.0397732	0.588474
PHKB	1.58552	-4.77179	2.32602	-2.05148	0.0402204	0.588474
SORBS1	7.90165	-6.05315	2.94633	-2.05447	0.0399299	0.588474
PLEKHM3	1.81617	4.16228	2.03249	2.04787	0.0405728	0.588889
COG7	2.36594	3.63914	1.77498	2.05024	0.0403411	0.588889
PCSK7	97.1067	2.07812	1.01424	2.04894	0.0404682	0.588889
CYB5R4	10.2836	-3.07098	1.49932	-2.04825	0.0405355	0.588889
IBTK	1.1763	-5.11889	2.49749	-2.04962	0.0404018	0.588889
CDKN2A	4.84322	6.77654	3.33478	2.03208	0.0421456	0.58913
MSANTD3	3.10289	5.9477	2.91807	2.03823	0.0415272	0.58913
KEAP1	3.28031	5.71935	2.7952	2.04613	0.0407435	0.58913
SMIM29	3.97588	5.59624	2.74318	2.04006	0.0413448	0.58913
ZNF576	1.32653	5.45482	2.66491	2.0469	0.0406675	0.58913
USP6	1.88412	5.38685	2.64123	2.03952	0.0413977	0.58913
FUT11	1.03184	4.73559	2.31725	2.04363	0.0409901	0.58913
NUDT5	10.0952	4.47552	2.19806	2.03612	0.0417383	0.58913
USP54	10.1683	4.20372	2.0581	2.04252	0.0411001	0.58913
ARRB2	9.12568	3.93933	1.93756	2.03314	0.0420379	0.58913
ZNF2	4.0037	3.71271	1.82616	2.03307	0.0420455	0.58913
PLAT	24.0843	3.55456	1.74872	2.03267	0.0420863	0.58913
TRPM7	8.76629	2.82206	1.3837	2.0395	0.0413997	0.58913
PPIP5K2	20.7572	-2.25658	1.10465	-2.04281	0.0410716	0.58913
ZNF385A	8.94169	-2.84344	1.39835	-2.03342	0.0420099	0.58913
BRD7	15.7355	-3.28853	1.61554	-2.03556	0.0417941	0.58913
CORO1C	15.8987	-3.56369	1.75113	-2.03508	0.0418423	0.58913
WDR55	6.55166	-3.67332	1.79658	-2.04462	0.0408921	0.58913
TPGS2	16.1536	-3.82717	1.88083	-2.03483	0.0418678	0.58913
TDRD3	9.29353	-3.91399	1.92281	-2.03556	0.0417947	0.58913
DOP1B	3.48701	-3.92668	1.92844	-2.03619	0.0417309	0.58913
EMBP1	3.0935	-3.98824	1.95471	-2.04032	0.0413184	0.58913
RXRA	4.49461	-4.55025	2.22455	-2.04547	0.0408084	0.58913
ARMC8	3.6024	-4.80733	2.36212	-2.03518	0.0418329	0.58913
NCAPH2	6.818	5.10415	2.51382	2.03044	0.0423119	0.589519
LGALS9	6.26815	4.2804	2.10935	2.02925	0.0424329	0.589519
ARID1A	29.479	2.92659	1.44166	2.03001	0.0423557	0.589519
TNS1	13.4996	-4.09388	2.01741	-2.02928	0.04243	0.589519
TTC39C	3.97721	2.31107	1.14064	2.02612	0.0427523	0.593049
FAM210B	40.8772	2.42896	1.19956	2.02488	0.0428801	0.593916
TP53	7.69076	-3.14351	1.55369	-2.02326	0.0430466	0.594409
KCNN4	2.16684	-5.59114	2.76275	-2.02376	0.0429945	0.594409
ARID4B	13.0063	-3.21038	1.58734	-2.02249	0.043126	0.594602
ARL4C	8.69518	3.29357	1.63002	2.02057	0.0433244	0.594857
PNPLA2	7.27738	-4.52971	2.24198	-2.02041	0.0433409	0.594857
SDCCAG8	6.56519	-4.53684	2.24441	-2.02139	0.0432391	0.594857
RPS24	71.2208	-1.65273	0.818492	-2.01924	0.0434624	0.595246
MYL12A	42.3044	-2.07139	1.02601	-2.01887	0.0435002	0.595246
PSMC1	11.2865	3.29029	1.63163	2.01657	0.0437407	0.596739
TMSB4X	327.086	-1.13927	0.564916	-2.0167	0.0437271	0.596739
MRPL43	2.01766	5.39733	2.67812	2.01534	0.0438692	0.597594
PLEKHA4	9.6263	4.39864	2.18508	2.01303	0.0441115	0.598988
FAM156A	8.56115	4.33536	2.15516	2.01161	0.0442607	0.598988
HMGCL	1.19478	4.22951	2.10555	2.00874	0.0445642	0.598988
RNF4	6.79623	4.03446	2.00845	2.00874	0.0445648	0.598988
CELF2	41.9003	2.83202	1.40874	2.01032	0.0443975	0.598988
ZBTB7A	43.8889	2.50126	1.24481	2.00935	0.0444998	0.598988
ARHGAP28	0.972976	-4.11793	2.04771	-2.011	0.0443259	0.598988
PURA	2.17662	-5.29805	2.63171	-2.01316	0.0440983	0.598988
PYROXD1	4.02066	-5.44324	2.708	-2.01006	0.0444251	0.598988
CYP20A1	1.33271	-3.1249	1.557	-2.00699	0.0447503	0.600593
SRSF11	83.4065	-2.38364	1.18864	-2.00534	0.0449266	0.601182
EXT1	5.06543	-5.51241	2.74828	-2.00577	0.0448808	0.601182
MACROD2	1.64221	4.98107	2.48551	2.00404	0.0450656	0.601538
AAR2	1.7863	4.94895	2.46996	2.00366	0.0451068	0.601538
RRP36	6.29144	3.70018	1.8471	2.00324	0.0451518	0.601538
IGFBP5	8.89381	-5.30606	2.65236	-2.00051	0.0454452	0.604561
MR1	11.9745	-3.54421	1.77357	-1.99835	0.0456784	0.606775
PPP4R3A	12.9837	4.19737	2.10254	1.99634	0.0458974	0.60746
CD84	3.03436	3.2641	1.63435	1.99718	0.0458057	0.60746
ENAH	25.8994	2.75107	1.37827	1.99603	0.0459306	0.60746
ATP6V0A2	13.6964	2.71711	1.36283	1.99373	0.0461817	0.609894
SETD6	3.81617	-3.98302	1.99968	-1.99183	0.0463897	0.610865
PARP11	1.69113	-5.50262	2.76223	-1.99209	0.0463609	0.610865
NACC1	4.41167	5.95465	2.99249	1.98986	0.0466058	0.612135
PRR11	1.50447	4.14301	2.08379	1.98821	0.0467882	0.612135
DVL1	4.96171	4.12574	2.07461	1.98868	0.0467361	0.612135
OSBP	13.5265	3.93334	1.97864	1.9879	0.046823	0.612135
FFAR2	1.04767	-4.36841	2.19596	-1.9893	0.0466686	0.612135
RPS27	75.8918	-2.30855	1.16271	-1.98549	0.0470898	0.614738
EIF4B	47.0169	-2.30102	1.15942	-1.98464	0.047185	0.615097
DENND3	3.553	-5.04362	2.54257	-1.98367	0.0472926	0.615617
NUP214	2.9352	5.99694	3.02615	1.9817	0.0475124	0.616656
KCMF1	1.06476	3.81876	1.92756	1.98114	0.047576	0.616656
IL6ST	21.8123	-3.71066	1.87237	-1.9818	0.0475014	0.616656
ARPC4	10.4793	3.09359	1.56556	1.97603	0.0481516	0.623227
SHOX	8.47417	3.89243	1.97943	1.96644	0.0492478	0.63091
UBE2K	40.5798	3.81937	1.93975	1.96899	0.0489537	0.63091
PPIAL4G	3.08859	3.16792	1.61137	1.96598	0.0493007	0.63091
SENP5	6.31237	-3.6721	1.8652	-1.96875	0.0489824	0.63091
TBC1D14	19.2555	-3.91137	1.98825	-1.96725	0.0491549	0.63091
HAX1	5.21781	-4.55535	2.31457	-1.96812	0.0490544	0.63091
CREB1	8.75251	-4.85906	2.47098	-1.96645	0.0492469	0.63091
BNIP3	2.41641	-5.76204	2.92462	-1.97018	0.0488178	0.63091
HDAC6	4.92326	3.59918	1.83169	1.96495	0.0494203	0.631551
USP16	3.15887	5.49361	2.80014	1.96191	0.0497734	0.632506
CIART	1.2602	4.98425	2.53968	1.96255	0.0496983	0.632506
PSMG1	2.86962	4.37082	2.22652	1.96307	0.0496384	0.632506
PRRG4	5.49398	3.3382	1.70111	1.96237	0.0497198	0.632506
CKS1B	2.91528	5.03625	2.57079	1.95903	0.0501094	0.634724
ATP1B2	3.3028	4.59017	2.34296	1.95914	0.0500969	0.634724
SH3GL1	2.16854	3.92201	2.00244	1.95862	0.0501576	0.634724
OLFML2A	1.80648	4.31644	2.20543	1.95719	0.0503253	0.635961
PTGES2	1.20811	5.46002	2.79059	1.95658	0.0503963	0.635974
SPI1	4.52707	4.37055	2.23478	1.9557	0.0505007	0.636407
TBRG4	6.02961	3.61912	1.85417	1.95188	0.0509525	0.640324
KIF22	5.99055	-4.29942	2.20265	-1.95193	0.050947	0.640324
SOCS4	3.88319	6.50933	3.33732	1.95047	0.0511207	0.641551
CDK16	1.53851	5.28376	2.71008	1.94967	0.051215	0.641848
NAPEPLD	2.01547	7.03799	3.61421	1.94731	0.0514975	0.642044
C9orf16	2.90918	4.31258	2.21455	1.94739	0.0514886	0.642044
NOCT	1.67198	3.53065	1.81376	1.94659	0.051584	0.642044
IFI30	22.6309	-3.0007	1.54123	-1.94695	0.0515409	0.642044
PER1	14.5858	-3.15607	1.61945	-1.94885	0.0513137	0.642044
CERS4	4.3873	6.16605	3.17638	1.94122	0.052232	0.642941
SPIRE1	4.81648	5.43226	2.79644	1.94256	0.0520688	0.642941
PKD1P6	1.14846	5.15632	2.65304	1.94355	0.0519498	0.642941
LHFPL5	2.36397	4.22451	2.177	1.94052	0.0523162	0.642941
GPN2	5.71901	3.75827	1.937	1.94025	0.052349	0.642941
HAP1	12.0999	3.13043	1.6128	1.94099	0.052259	0.642941
TFDP2	4.96003	2.25112	1.1572	1.94532	0.0517366	0.642941
PEX26	61.1536	2.16168	1.1126	1.94291	0.0520269	0.642941
ITIH5	4.86875	-3.0381	1.56733	-1.93839	0.052576	0.642941
SMARCD1	10.6376	-3.09581	1.59361	-1.94264	0.0520595	0.642941
NXF1	9.48601	-3.24891	1.67571	-1.93882	0.0525227	0.642941
TMPO	13.6503	-3.51371	1.81147	-1.9397	0.0524158	0.642941
STX10	3.9366	-4.34448	2.23997	-1.93952	0.0524375	0.642941
WASHC3	2.4269	5.97094	3.0924	1.93084	0.0535029	0.644417
MED14	6.11953	5.88179	3.04555	1.93127	0.0534494	0.644417
DERL2	5.01828	5.456	2.83254	1.92618	0.0540816	0.644417
FKBP15	1.92142	5.15234	2.67744	1.92435	0.0543104	0.644417
KIAA1958	2.08453	4.35976	2.2626	1.92688	0.0539942	0.644417
ROBO1	0.952198	4.1858	2.17108	1.92798	0.053858	0.644417
PMM2	1.13405	3.88273	2.01612	1.92585	0.0541233	0.644417
MGA	8.16399	3.68885	1.90708	1.93429	0.0530769	0.644417
MTFR1L	5.75758	3.53355	1.82681	1.93427	0.0530799	0.644417
ZNF417	2.69215	3.47695	1.80048	1.93112	0.0534681	0.644417
ZNF519	28.7661	2.97143	1.54421	1.92424	0.0543247	0.644417
EIF4G2	69.2175	1.66381	0.859717	1.9353	0.052953	0.644417
CAV2	18.8465	-2.93488	1.51613	-1.93577	0.0528955	0.644417
PCNX2	3.28904	-3.15985	1.63762	-1.92954	0.053664	0.644417
ABRAXAS1	0.965272	-3.30452	1.71654	-1.92511	0.0542162	0.644417
PSMD11	4.55366	-3.38109	1.75713	-1.92421	0.0543279	0.644417
BCL2L15	1.26438	-3.9869	2.06804	-1.92786	0.053872	0.644417
FBXO15	7.56886	-3.98794	2.07059	-1.926	0.0541046	0.644417
ELP4	1.9778	-4.17033	2.15726	-1.93316	0.0532161	0.644417
FUBP3	4.13211	-4.4237	2.29649	-1.92629	0.0540683	0.644417
AGK	1.37813	-4.90106	2.54485	-1.92587	0.0541203	0.644417
EMB	16.1825	-4.92856	2.55474	-1.92918	0.053708	0.644417
SLC19A2	3.32131	-5.32058	2.76384	-1.92507	0.0542207	0.644417
SV2A	2.64074	5.89089	3.06254	1.92353	0.0544133	0.644589
MYO9B	9.88086	3.71275	1.93142	1.92228	0.05457	0.644764
KREMEN1	13.5767	2.64327	1.37499	1.92239	0.0545572	0.644764
NWD1	1.62391	3.87982	2.02117	1.91959	0.0549098	0.647935
TMCO3	8.29025	-4.44317	2.31596	-1.9185	0.055048	0.648724
NAXE	3.98478	-3.87691	2.02206	-1.9173	0.0551993	0.648851
IKZF1	6.19482	-5.43249	2.83343	-1.91729	0.0552016	0.648851
RLIM	2.12551	4.65408	2.42939	1.91574	0.0553978	0.650258
SLC38A1	15.1991	-4.1276	2.15516	-1.91522	0.0554644	0.650258
OR52A1	2.5494	3.92414	2.0507	1.91357	0.0556756	0.650538
DYNC1I2	7.39313	3.3155	1.73333	1.91279	0.0557751	0.650538
BRAF	3.01478	-2.67348	1.39752	-1.91301	0.0557464	0.650538
LSM3	11.9608	-3.0647	1.60259	-1.91235	0.0558317	0.650538
ELF1	17.5456	-3.80825	1.99204	-1.91173	0.055911	0.650538
SERPINB6	4.88273	-4.10282	2.14619	-1.91167	0.055918	0.650538
NDUFS5	16.6281	-2.91273	1.52692	-1.90759	0.0564446	0.654988
ALG13	4.13546	-4.63126	2.42718	-1.90808	0.0563803	0.654988
L2HGDH	14.4124	-2.55398	1.33982	-1.90621	0.0566228	0.656218
HMGN4	12.0772	3.93701	2.07115	1.90088	0.0573171	0.662805
DUSP7	8.2032	-3.87797	2.04025	-1.90073	0.0573371	0.662805
PWWP2A	1.16247	6.03788	3.1787	1.89948	0.0575013	0.663016
ANKRD36BP2	4.38474	3.55638	1.87222	1.89955	0.0574918	0.663016
NSMCE2	1.66626	5.82524	3.07176	1.89638	0.0579093	0.664013
PLK2	2.66123	5.1668	2.72388	1.89686	0.0578468	0.664013
TCERG1	8.7549	3.82273	2.0158	1.89638	0.0579094	0.664013
VSNL1	1.9898	3.21857	1.69751	1.89605	0.0579531	0.664013
GTDC1	9.81132	-2.53514	1.336	-1.89755	0.0577549	0.664013
PIK3C2A	4.95878	4.04533	2.13763	1.89244	0.0584326	0.668664
ZNF131	4.4694	-4.21163	2.22629	-1.89177	0.0585215	0.668838
NHLRC3	29.7721	3.15861	1.67068	1.89061	0.058676	0.669761
MRPL13	1.2413	5.06509	2.68387	1.88724	0.0591284	0.672004
PNPO	9.05711	2.25444	1.19476	1.88694	0.0591683	0.672004
ARL1	14.0659	-3.92468	2.07906	-1.88772	0.059063	0.672004
CA12	6.56632	-4.15014	2.19882	-1.88744	0.0591013	0.672004
FKBP9P1	1.90505	5.0084	2.6575	1.88463	0.0594798	0.674698
MEGF6	7.30678	-4.84698	2.57889	-1.87948	0.0601785	0.681773
MIEF2	0.994329	4.32578	2.30352	1.8779	0.0603942	0.682514
ZNF765	2.16349	2.9655	1.57891	1.87819	0.0603548	0.682514
NR1H2	6.58986	5.17086	2.75637	1.87596	0.0606602	0.684669
MAP3K13	15.0673	-2.59359	1.38316	-1.87512	0.0607764	0.68513
NDRG2	2.64968	3.16958	1.69146	1.87387	0.0609481	0.686214
FCGBP	1.48893	5.29404	2.82905	1.87132	0.0613012	0.687633
CWF19L1	6.68715	3.38737	1.80985	1.87163	0.0612578	0.687633
PLPP2	5.46294	-3.22197	1.72149	-1.87161	0.0612604	0.687633
EIF4A1	53.3903	-1.57285	0.841531	-1.86904	0.0616176	0.68948
TBC1D23	1.93573	-5.51889	2.95223	-1.8694	0.0615677	0.68948
SPRY2	9.44271	5.93635	3.18	1.86678	0.0619327	0.689608
TMEM192	19.8102	2.12377	1.13756	1.86695	0.0619081	0.689608
IVD	2.08677	-3.17922	1.702	-1.86794	0.0617707	0.689608
PSMG2	10.0987	-4.47139	2.39496	-1.867	0.0619014	0.689608
SEC23IP	5.15936	-4.21968	2.26128	-1.86606	0.0620324	0.689874
MRPS11	2.66696	5.01068	2.68897	1.86342	0.062403	0.690613
UTRN	6.90147	4.27266	2.2919	1.86424	0.0622874	0.690613
SPTB	5.13309	3.05056	1.63634	1.86426	0.0622859	0.690613
ELOVL5	8.79156	-3.50705	1.88178	-1.86369	0.0623654	0.690613
TMEM154	3.35514	3.727	2.00485	1.859	0.0630278	0.690797
KRT1	157.921	2.69032	1.4456	1.86104	0.0627386	0.690797
ATM	18.9493	2.29362	1.23322	1.85986	0.0629052	0.690797
S100A6	114.046	-1.67991	0.902229	-1.86195	0.0626096	0.690797
RNPS1	22.1541	-2.5437	1.3656	-1.8627	0.0625044	0.690797
ZNF585A	1.85185	-4.34734	2.33672	-1.86045	0.0628222	0.690797
GAA	1.11828	-4.41956	2.37695	-1.85934	0.0629783	0.690797
CHD7	3.19512	-4.79236	2.57537	-1.86084	0.0627666	0.690797
CAMK1D	10.3573	2.68554	1.44523	1.85821	0.0631394	0.691186
VPS39	14.8228	-4.3971	2.36845	-1.85653	0.063378	0.692964
MEA1	1.64044	-4.99605	2.69383	-1.85463	0.0636495	0.695095
DNAJA3	1.30152	4.80044	2.58948	1.85382	0.0637643	0.695513
JPT2	3.44055	4.53715	2.45282	1.84977	0.0643472	0.699457
PPP3CA	11.2165	4.27226	2.3097	1.8497	0.0643569	0.699457
CLCN7	24.4454	-2.26603	1.22467	-1.85032	0.064268	0.699457
ASH2L	10.3485	-2.98693	1.61539	-1.84905	0.0644507	0.699641
SYNM	3.11586	-6.46141	3.49617	-1.84814	0.0645818	0.700227
RNF144B	4.00814	-5.0952	2.75863	-1.84701	0.0647462	0.701173
CLIP1	15.9005	1.7084	0.926544	1.84384	0.0652059	0.705115
PARD6G	7.64052	-2.73315	1.48264	-1.84344	0.0652654	0.705115
CCDC84	2.82519	4.16969	2.26761	1.8388	0.0659444	0.706029
CDC42EP4	8.14866	4.00189	2.17658	1.83862	0.0659716	0.706029
ZNF788P	4.07019	3.98433	2.16433	1.8409	0.0656356	0.706029
NDUFAF7	1.71357	3.67045	1.99277	1.84188	0.0654923	0.706029
SOX6	8.97474	3.45222	1.87742	1.83881	0.0659429	0.706029
SLC15A1	3.72067	2.51102	1.36362	1.84144	0.0655568	0.706029
LCP1	26.4992	2.50556	1.36269	1.83869	0.0659607	0.706029
SQOR	4.44144	-4.15241	2.25793	-1.83904	0.0659095	0.706029
ATP5MG	26.3321	-2.07946	1.13397	-1.8338	0.0666843	0.712816
KCTD15	6.29139	-5.08898	2.77837	-1.83164	0.0670046	0.715398
DEF6	5.11632	5.34716	2.92511	1.82802	0.067547	0.71614
PRR14	1.89581	4.88525	2.67005	1.82965	0.0673023	0.71614
RAD1	3.65629	3.35475	1.8347	1.8285	0.0674747	0.71614
AKAP13	20.6348	2.85369	1.56103	1.82808	0.0675369	0.71614
PCNX4	69.9283	2.80682	1.53385	1.82992	0.0672617	0.71614
CALHM6	6.19607	-4.29656	2.35	-1.82833	0.0675003	0.71614
ETS2	5.81688	3.58637	1.96263	1.82733	0.0676504	0.716401
MADD	1.62741	4.68114	2.56504	1.82498	0.0680043	0.717638
NEIL1	2.09942	4.0395	2.21291	1.82542	0.0679377	0.717638
SRSF8	5.27089	-4.01708	2.20055	-1.82549	0.0679274	0.717638
APH1A	5.14694	2.69944	1.47976	1.82425	0.0681149	0.717715
UFC1	8.11604	-2.96403	1.62512	-1.82388	0.0681695	0.717715
DCDC1	3.17776	5.28154	2.90086	1.82068	0.0686553	0.719194
CHRAC1	1.1712	4.18385	2.29758	1.82098	0.06861	0.719194
ERP44	5.31753	3.92824	2.15657	1.82152	0.0685282	0.719194
ZMAT3	23.6377	-1.742	0.956956	-1.82035	0.0687057	0.719194
P3H1	4.01033	-2.82816	1.55225	-1.82198	0.0684587	0.719194
PLEKHG3	3.2816	4.87392	2.6802	1.81849	0.0689895	0.719677
EIF4EBP1	1.32505	4.15813	2.28579	1.81913	0.0688922	0.719677
PTGR1	4.68235	3.38459	1.86078	1.81891	0.0689254	0.719677
PRTG	4.3832	4.2307	2.32762	1.81761	0.069124	0.720253
MAST1	1.66666	4.01462	2.21095	1.81579	0.0694022	0.720672
MYH3	5.80446	2.76111	1.52036	1.81609	0.069356	0.720672
STMP1	13.6541	-2.79131	1.53719	-1.81585	0.0693928	0.720672
ITM2A	6.00192	-4.50441	2.48307	-1.81405	0.0696706	0.722634
TRAPPC5	25.7628	-3.07755	1.69758	-1.8129	0.0698472	0.72328
MTREX	8.63484	-3.11367	1.71827	-1.81209	0.0699717	0.72328
TXNDC12	3.09121	-3.40096	1.87632	-1.81257	0.0698977	0.72328
ZNF512	2.017	6.87623	3.79664	1.81114	0.0701195	0.723404
CNIH4	9.62919	3.94345	2.17875	1.80996	0.0703022	0.723404
CNDP2	28.5851	-2.26967	1.25389	-1.8101	0.0702807	0.723404
TFDP1	4.33643	-5.04708	2.78815	-1.81019	0.0702663	0.723404
CD40	3.7879	3.74589	2.07117	1.80859	0.0705155	0.724094
GGPS1	10.7399	3.58095	1.98337	1.80549	0.0709986	0.724094
TCTN1	20.8313	2.61099	1.44533	1.80649	0.0708414	0.724094
DDX55	4.6105	2.54381	1.40661	1.80847	0.0705335	0.724094
PLSCR1	55.2498	-3.08948	1.71083	-1.80583	0.0709441	0.724094
RRAGC	11.7014	-3.33614	1.84783	-1.80543	0.0710068	0.724094
MTRNR2L4	1.925	-3.66734	2.03021	-1.80638	0.0708584	0.724094
PLEKHA3	3.80798	-4.51882	2.5007	-1.80703	0.0707582	0.724094
GRAMD1A	4.20158	3.81924	2.11724	1.80388	0.0712509	0.725768
TERF1	5.55975	-2.89511	1.60657	-1.80205	0.0715382	0.727065
LNPEP	9.94358	-3.77443	2.09399	-1.8025	0.0714661	0.727065
CCDC88B	13.4725	4.04981	2.249	1.80071	0.0717482	0.727571
ANKRD9	8.12803	-2.55524	1.41862	-1.80121	0.0716691	0.727571
EMSY	1.98233	4.11772	2.28875	1.79911	0.0720007	0.729318
ITK	4.89991	3.1576	1.7559	1.79828	0.0721325	0.729839
VPS4A	15.1943	2.89758	1.61249	1.79696	0.0723421	0.730334
NCOR2	6.15325	-3.56307	1.98279	-1.797	0.0723352	0.730334
JUNB	40.9249	-2.29894	1.28065	-1.79513	0.0726326	0.731962
TNRC6C	8.05685	-3.9234	2.18582	-1.79493	0.0726645	0.731962
MRPL50	3.18761	5.71207	3.18444	1.79374	0.0728541	0.732248
CAPN2	16.743	-2.31292	1.2894	-1.7938	0.0728457	0.732248
MPP4	2.50244	-3.0582	1.70541	-1.79323	0.0729364	0.732266
YIPF3	2.50956	3.93707	2.19651	1.79242	0.0730658	0.732755
C1orf174	5.65887	3.17039	1.76969	1.79149	0.0732143	0.733435
PARVG	4.79333	5.26139	2.9407	1.78916	0.0735887	0.734755
GMEB1	6.54468	2.21982	1.24042	1.78956	0.0735246	0.734755
CNR2	5.371	-2.70078	1.50895	-1.78985	0.0734782	0.734755
NSUN4	2.04984	4.45996	2.49442	1.78798	0.0737795	0.735852
RCHY1	4.34055	6.73938	3.78038	1.78272	0.0746311	0.740549
MT1F	2.75754	5.1347	2.88083	1.78237	0.0746896	0.740549
SEC16A	8.2291	4.0185	2.25415	1.78271	0.0746335	0.740549
SRPK2	5.79707	3.971	2.22603	1.7839	0.0744404	0.740549
NXPE3	5.07557	3.49392	1.9639	1.77907	0.0752286	0.740549
MALL	1.87801	3.44707	1.93475	1.78166	0.0748041	0.740549
UBE2I	8.15355	3.3949	1.90809	1.77922	0.0752044	0.740549
TMBIM1	14.6538	2.3305	1.308	1.78172	0.0747942	0.740549
TAP1	16.935	-3.32727	1.86959	-1.77968	0.0751283	0.740549
SZRD1	3.8966	-3.35894	1.8871	-1.77995	0.0750847	0.740549
TNFSF12	1.63704	-4.12693	2.31752	-1.78075	0.0749533	0.740549
EVI5	2.60077	-4.85259	2.72562	-1.78036	0.0750166	0.740549
GALNT15	1.0089	4.59088	2.58231	1.77782	0.0754332	0.740651
ZNF207	62.6614	-2.8854	1.62328	-1.77752	0.0754834	0.740651
VDAC3	5.949	-3.7076	2.08491	-1.7783	0.075354	0.740651
SMARCB1	5.63271	4.31783	2.43486	1.77334	0.0761722	0.746363
TSC22D2	6.1823	3.53675	1.99479	1.77299	0.0762299	0.746363
ARHGAP26	17.348	-2.62771	1.48306	-1.77182	0.0764251	0.747468
ASXL1	3.89483	-3.82393	2.16094	-1.76957	0.0767994	0.750322
TRIM3	3.86747	6.25761	3.54416	1.76561	0.0774609	0.750413
FAM160A2	1.8537	4.79444	2.71809	1.7639	0.0777488	0.750413
FAAP24	2.34026	4.12636	2.34009	1.76333	0.0778445	0.750413
CHID1	6.02091	3.98016	2.25839	1.76238	0.0780043	0.750413
KLK11	1.33494	3.86889	2.19059	1.76615	0.0773714	0.750413
ZNF616	1.25601	3.55371	2.01584	1.76289	0.0779186	0.750413
PCCA	17.6477	3.29906	1.86905	1.7651	0.0775476	0.750413
RFFL	10.0451	2.78106	1.57786	1.76255	0.077977	0.750413
RPL15	221.431	1.36049	0.769853	1.76721	0.0771938	0.750413
LGALS3	60.5977	-1.65245	0.936104	-1.76524	0.0775232	0.750413
CD164	54.8368	-2.12517	1.20174	-1.76841	0.0769928	0.750413
SRGN	37.7565	-2.50318	1.4187	-1.76441	0.0776622	0.750413
TRAF5	6.87389	-3.51415	1.99249	-1.76369	0.0777835	0.750413
GAK	2.69808	-3.99222	2.26437	-1.76306	0.07789	0.750413
C1orf122	2.23277	-4.6591	2.64402	-1.76213	0.0780476	0.750413
C1orf52	1.69566	4.71468	2.67783	1.76064	0.0783001	0.752045
PTPN14	11.6184	1.82786	1.03962	1.7582	0.0787137	0.752834
GNG5	49.2477	-2.26675	1.28862	-1.75905	0.0785686	0.752834
HSD17B11	4.41659	-3.56045	2.02363	-1.75944	0.0785033	0.752834
CCM2	2.0706	-4.25762	2.42156	-1.75822	0.0787108	0.752834
FCN1	4.12944	-2.51835	1.43289	-1.75753	0.0788279	0.753134
TMEM65	1.90176	4.27909	2.43607	1.75655	0.0789937	0.753637
BAP1	3.37715	-3.88334	2.21116	-1.75625	0.0790465	0.753637
ZNF714	3.34853	2.99384	1.70563	1.75527	0.079213	0.754434
SULT1A1	2.60521	5.07272	2.89361	1.75308	0.0795883	0.756422
RSRC2	3.3014	3.75124	2.13963	1.75322	0.079564	0.756422
ZPR1	8.49072	2.58442	1.47604	1.75091	0.0799607	0.757584
JDP2	1.44636	-3.70569	2.11632	-1.75101	0.079944	0.757584
CBLB	5.54563	-5.35153	3.05543	-1.75148	0.0798629	0.757584
SC5D	0.970999	3.73611	2.13557	1.74947	0.0802096	0.758737
TYRP1	400.164	1.49645	0.855487	1.74924	0.0802494	0.758737
PRKCA	1.7595	3.33876	1.91033	1.74774	0.0805088	0.758821
P2RX4	7.90475	3.28211	1.8774	1.74822	0.0804257	0.758821
RESF1	11.3912	-3.74142	2.13998	-1.74834	0.0804055	0.758821
LSAMP	1.30573	5.93603	3.40406	1.74381	0.0811924	0.763231
MSL2	1.33671	5.85402	3.35809	1.74326	0.0812883	0.763231
PLEKHG2	1.89732	3.18087	1.8255	1.74246	0.0814273	0.763231
CSTB	55.5913	-2.93407	1.68337	-1.74298	0.0813373	0.763231
NARS2	7.7453	-5.287	3.03474	-1.74216	0.0814807	0.763231
GSTO2	1.40789	-5.63247	3.22968	-1.74397	0.0811641	0.763231
NAA16	4.43895	4.44743	2.55388	1.74144	0.0816071	0.763627
RASAL2	4.93474	3.85695	2.21544	1.74094	0.0816934	0.763648
SMIM11B	0.882882	5.32773	3.06817	1.73645	0.0824836	0.766479
ZNHIT6	3.38339	4.58534	2.63772	1.73838	0.0821445	0.766479
RHD	1.57392	3.33882	1.92259	1.73663	0.0824522	0.766479
CSE1L	9.32069	2.73563	1.57541	1.73645	0.0824838	0.766479
KYNU	19.9084	-1.86407	1.07356	-1.73635	0.0825024	0.766479
CDC42	54.6714	-1.98641	1.14282	-1.73816	0.0821822	0.766479
GNAI1	1.25566	-6.26637	3.6102	-1.73574	0.0826094	0.76669
MTMR3	2.61136	4.50263	2.59745	1.73348	0.0830109	0.767936
YWHAQ	30.5218	2.41703	1.39448	1.73329	0.0830448	0.767936
NAV3	6.39369	-2.64866	1.5283	-1.73308	0.0830818	0.767936
TRAPPC13	2.48252	-5.90514	3.40471	-1.73441	0.0828461	0.767936
PNO1	1.21652	5.20963	3.00947	1.73108	0.0834374	0.768276
WASH7P	1.40414	4.60142	2.66172	1.72874	0.0838556	0.768276
MORN4	1.13297	4.57177	2.64507	1.72841	0.0839144	0.768276
AKIRIN2	3.50329	4.54692	2.63398	1.72625	0.0843023	0.768276
RBM14	2.66978	4.53411	2.62445	1.72764	0.0840531	0.768276
CCND3	3.94177	4.41194	2.5483	1.73133	0.0833935	0.768276
ZNF780B	2.1009	3.94121	2.28135	1.72758	0.0840639	0.768276
HMCN2	6.57018	3.63492	2.10221	1.7291	0.0837917	0.768276
ARHGDIB	19.1513	-2.44779	1.41758	-1.72674	0.084215	0.768276
PTP4A2	67.1397	-2.50063	1.44557	-1.72986	0.0836559	0.768276
TBCCD1	3.34427	-2.84548	1.64602	-1.7287	0.0838623	0.768276
NAPG	25.3424	-3.08086	1.78093	-1.72992	0.083645	0.768276
EIF2A	10.8435	-3.61385	2.08912	-1.72984	0.0836581	0.768276
RPA1	4.84885	-3.7092	2.1485	-1.72641	0.0842729	0.768276
ZNF84	3.31688	5.50631	3.19521	1.7233	0.084834	0.768496
ILK	2.14342	4.24153	2.46123	1.72334	0.0848275	0.768496
TXNDC15	8.44276	3.80146	2.20357	1.72514	0.0845029	0.768496
SLC29A4	1.89992	2.62433	1.52136	1.72498	0.0845309	0.768496
RILPL2	5.95958	-2.04626	1.18671	-1.72431	0.0846524	0.768496
HPCAL1	6.66091	-2.97916	1.72866	-1.7234	0.0848164	0.768496
RYBP	3.09906	4.3845	2.54714	1.72134	0.0851883	0.769609
LEMD3	1.26608	3.72392	2.16412	1.72075	0.0852956	0.769609
DLST	3.16499	3.26356	1.8962	1.72111	0.0852308	0.769609
WDFY2	1.71679	2.8832	1.67457	1.72176	0.085113	0.769609
ULBP3	2.0157	3.42437	1.99181	1.71923	0.0855725	0.771341
ATG7	2.76685	5.25023	3.06003	1.71574	0.0862094	0.771675
GALNT1	4.51912	3.64854	2.12428	1.71754	0.0858807	0.771675
ZNF442	2.26823	2.62135	1.52794	1.71561	0.086234	0.771675
MICALL1	5.62267	2.61903	1.52615	1.7161	0.0861437	0.771675
AFMID	14.7272	1.9282	1.12348	1.71627	0.0861118	0.771675
PI4KAP2	11.1079	-2.34188	1.36285	-1.71836	0.0857308	0.771675
VPS26B	1.63247	-4.91695	2.86553	-1.7159	0.0861811	0.771675
EML3	6.77178	-5.21626	3.04101	-1.71531	0.086289	0.771675
NPHP4	1.19779	5.93676	3.46637	1.71268	0.0867722	0.772071
SLC25A34	1.64603	5.10698	2.98301	1.71203	0.086892	0.772071
MIER2	3.19664	4.63101	2.70583	1.71149	0.0869903	0.772071
ZNF410	1.58366	4.14926	2.42453	1.71137	0.0870131	0.772071
DYNC1LI2	33.365	3.45576	2.01907	1.71156	0.0869781	0.772071
C1orf61	5.6564	2.13936	1.24843	1.71363	0.0865962	0.772071
WASHC2A	6.182	-2.77176	1.61661	-1.71456	0.0864264	0.772071
CISD2	9.30262	-4.15748	2.42754	-1.71263	0.086781	0.772071
WDR83	1.93413	3.52329	2.06008	1.71027	0.0872158	0.772361
PSMD12	20.173	-3.18296	1.86087	-1.71046	0.0871801	0.772361
TRIM24	1.74186	-3.88774	2.27476	-1.70908	0.0874365	0.773562
USP36	3.56665	4.22726	2.47564	1.70754	0.0877217	0.77533
SLC6A6	2.5339	-4.45171	2.60824	-1.70679	0.0878619	0.775815
HADHA	2.93226	-3.01727	1.76894	-1.70569	0.0880657	0.77686
VIM	416.184	-1.13338	0.66503	-1.70425	0.0883337	0.778468
SLC5A2	1.36555	5.09322	3.00118	1.69707	0.0896829	0.778901
STXBP2	0.928853	5.00427	2.94923	1.69681	0.0897329	0.778901
RC3H2	1.01584	4.69775	2.77087	1.69541	0.089998	0.778901
TRAFD1	3.49814	4.35788	2.56979	1.69581	0.0899221	0.778901
ZNF570	1.10912	4.09388	2.41334	1.69635	0.0898192	0.778901
U2AF1L4	4.30479	3.82734	2.25137	1.7	0.0891301	0.778901
WAS	2.6624	3.7205	2.18868	1.69989	0.0891521	0.778901
LRCH4	9.55494	3.14768	1.84853	1.7028	0.0886059	0.778901
UBR5	11.2935	3.13292	1.84092	1.70183	0.0887878	0.778901
PNMA2	2.70771	2.89283	1.69831	1.70336	0.0885004	0.778901
TNRC18	32.0921	-1.97652	1.16501	-1.69658	0.0897766	0.778901
C16orf72	11.7821	-2.26105	1.32913	-1.70115	0.0889154	0.778901
GDI2	15.0978	-2.56283	1.50623	-1.70149	0.0888506	0.778901
MAGED1	30.1579	-2.61947	1.54346	-1.69714	0.0896697	0.778901
ZNF706	22.7405	-2.83557	1.6722	-1.69571	0.0899411	0.778901
FAM167B	3.45219	-3.11739	1.8388	-1.69534	0.0900117	0.778901
FAT1	8.71123	-3.41082	2.01081	-1.69624	0.0898408	0.778901
KLHL42	11.5482	-4.20452	2.4787	-1.69626	0.0898361	0.778901
SLC7A6	7.99922	-4.66173	2.74228	-1.69995	0.0891403	0.778901
SRGAP1	24.8009	2.47304	1.45978	1.69412	0.0902427	0.778932
HNRNPC	73.1863	-1.8103	1.06868	-1.69396	0.0902725	0.778932
RNPEP	3.76531	-3.14462	1.85575	-1.69453	0.0901645	0.778932
PIN4	0.877135	-3.91058	2.31202	-1.69141	0.0907588	0.782385
COX4I1	40.3783	2.11207	1.2491	1.69087	0.0908623	0.782535
PLOD2	1.28965	-5.04023	2.98208	-1.69018	0.0909942	0.782929
VEZT	7.39293	3.36419	1.99217	1.68871	0.0912753	0.784605
PDK4	2.28265	5.26096	3.12126	1.68553	0.0918868	0.789115
RMDN1	1.37198	4.7185	2.80525	1.68203	0.0925636	0.789702
ZNF584	1.06291	4.60489	2.73759	1.6821	0.09255	0.789702
FGD2	4.5762	4.48077	2.66007	1.68446	0.0920929	0.789702
MDK	7.94279	3.3598	1.9965	1.68284	0.0924054	0.789702
SLC27A5	8.74774	-2.09399	1.24401	-1.68326	0.0923251	0.789702
DNAJC13	25.2904	-3.06497	1.82205	-1.68215	0.092539	0.789702
TSPYL5	3.3933	-4.83906	2.87406	-1.6837	0.0922389	0.789702
GATM	1.77349	4.05936	2.41405	1.68156	0.0926545	0.789737
PDZD7	1.06307	4.73481	2.81716	1.6807	0.0928208	0.790412
EMG1	2.5991	4.16427	2.4807	1.67866	0.0932176	0.793048
BST1	1.60616	6.23516	3.72059	1.67585	0.0937667	0.793263
RIC8A	1.22761	4.35183	2.59662	1.67596	0.0937467	0.793263
KIAA1841	2.3917	4.18435	2.49684	1.67586	0.0937657	0.793263
GGCX	19.0021	2.65108	1.58125	1.67657	0.0936259	0.793263
LGALS1	13.6215	-2.23075	1.33147	-1.67541	0.093854	0.793263
BBS1	0.926018	-2.8198	1.6819	-1.67656	0.0936285	0.793263
IER2	13.4112	-3.10101	1.85084	-1.67546	0.0938433	0.793263
ASXL2	5.57836	4.5699	2.72891	1.67463	0.0940074	0.793821
HAUS8	0.984096	3.66236	2.18856	1.67341	0.0942462	0.795098
NIN	30.2748	-3.0612	1.83038	-1.67244	0.0944377	0.795237
NUSAP1	4.56612	-3.88105	2.32052	-1.67249	0.0944281	0.795237
TFCP2	4.5768	3.65212	2.18588	1.67078	0.0947648	0.797253
SLC30A2	2.28722	3.84313	2.30229	1.66926	0.0950659	0.798329
SLTM	11.999	2.91388	1.74604	1.66885	0.095147	0.798329
BTN3A1	20.7736	-2.4437	1.46473	-1.66836	0.0952442	0.798329
DTD1	4.01186	-3.60321	2.15964	-1.66843	0.0952303	0.798329
CRIM1	2.20174	5.1037	3.06084	1.66742	0.0954314	0.799161
ITGA1	1.55665	-3.24416	1.94622	-1.6669	0.0955338	0.799282
CRCP	1.96601	-3.85981	2.31665	-1.66612	0.0956891	0.799845
PPCS	1.97274	4.44643	2.67114	1.66462	0.0959887	0.800215
ATP6V1C1	4.85935	3.70994	2.22832	1.6649	0.0959319	0.800215
FAXDC2	4.66681	2.88068	1.73058	1.66457	0.0959976	0.800215
CD180	2.84791	-2.93597	1.76478	-1.66365	0.0961831	0.801026
RPS4X	63.0006	-1.49697	0.900458	-1.66245	0.0964222	0.801548
KIDINS220	14.2616	-3.14129	1.88937	-1.66262	0.0963894	0.801548
TMEM184B	2.06669	5.40465	3.25723	1.65928	0.0970602	0.801717
RPS6KA5	32.529	1.41735	0.854066	1.65953	0.0970092	0.801717
RICTOR	10.1227	-2.126	1.28113	-1.65948	0.0970195	0.801717
GGA1	11.7409	-2.22665	1.34176	-1.6595	0.0970158	0.801717
RAB11A	88.7808	-2.46667	1.48559	-1.6604	0.0968342	0.801717
ZRANB2	34.8593	-2.92481	1.76267	-1.6593	0.097055	0.801717
TRAF3IP3	3.75682	-4.19241	2.52322	-1.66153	0.0966073	0.801717
CEBPZ	3.54566	4.64612	2.80561	1.65601	0.0977193	0.802783
CROT	4.06731	4.57002	2.75821	1.65688	0.0975437	0.802783
AP4M1	0.970209	4.08369	2.46423	1.65719	0.0974814	0.802783
ACTA2	15.6911	-3.05359	1.84278	-1.65706	0.0975071	0.802783
MARS1	3.52427	-3.14687	1.90005	-1.6562	0.0976809	0.802783
FMR1	30.542	-3.27446	1.97723	-1.65608	0.0977047	0.802783
ADCK1	1.29747	5.6257	3.39872	1.65524	0.0978757	0.802858
ELP6	0.898277	-3.95438	2.38922	-1.65509	0.0979053	0.802858
SESN1	1.43325	5.19168	3.13768	1.65462	0.0980011	0.80292
SEMA4F	1.33944	2.9872	1.80634	1.65373	0.0981827	0.802953
CSK	10.367	-2.8679	1.73444	-1.6535	0.0982291	0.802953
KIAA1143	4.67846	-3.11156	1.88203	-1.6533	0.0982703	0.802953
FLACC1	2.38185	5.24002	3.17663	1.64955	0.0990346	0.803076
TMEM120A	0.87344	5.15137	3.12496	1.64846	0.0992576	0.803076
CASP1	5.18588	5.02351	3.04322	1.65072	0.0987952	0.803076
WDR41	2.36407	4.48412	2.71693	1.65044	0.0988535	0.803076
MAPK6	6.72191	3.45895	2.09285	1.65274	0.098383	0.803076
LTBP4	14.3559	3.32767	2.01767	1.64926	0.0990941	0.803076
SLC30A4	4.05873	3.28383	1.99052	1.64973	0.0989973	0.803076
GTPBP4	10.6081	2.80982	1.70421	1.64875	0.0991988	0.803076
MT-CO1	599.143	-0.901199	0.545641	-1.65163	0.0986096	0.803076
NPIPB5	58.3969	-1.79826	1.08944	-1.65063	0.0988147	0.803076
PSMB10	4.36365	-3.01664	1.82821	-1.65005	0.0989327	0.803076
ZCRB1	2.77695	4.14294	2.51533	1.64707	0.0995433	0.804671
PRR14L	3.6978	4.69458	2.85755	1.64287	0.10041	0.805943
GINM1	9.18537	3.01015	1.83094	1.64405	0.100166	0.805943
SIX4	2.4253	2.7418	1.66799	1.64378	0.100222	0.805943
RAB1A	21.9635	-2.42037	1.4732	-1.64293	0.100398	0.805943
NFKBIB	2.15714	-2.92635	1.77816	-1.64572	0.099822	0.805943
RCN1	5.27547	-3.28242	1.99718	-1.64353	0.100273	0.805943
SLC38A10	3.68236	-3.36043	2.04291	-1.64492	0.0999858	0.805943
DSE	10.8466	-4.92355	2.99381	-1.64457	0.100058	0.805943
DOCK8	12.9652	-3.11687	1.89902	-1.6413	0.100735	0.807837
PTPRE	3.62366	4.20855	2.56528	1.64058	0.100884	0.808321
LCA5L	1.22781	5.29132	3.22748	1.63946	0.101117	0.809473
TMA7	69.5812	-1.74944	1.06765	-1.63859	0.101298	0.810207
TCEAL8	3.59414	4.95644	3.02885	1.63641	0.101753	0.813133
NAA20	7.88466	-3.5443	2.16694	-1.63563	0.101918	0.813733
MAP3K15	0.918484	4.22141	2.5843	1.63348	0.102368	0.813751
ALPK1	1.50616	4.17233	2.55415	1.63355	0.102354	0.813751
ARFGAP2	15.4888	2.7091	1.65773	1.63422	0.102213	0.813751
CD226	3.24742	-2.47334	1.51329	-1.63441	0.102173	0.813751
COA6	8.77786	-3.27137	2.00069	-1.63512	0.102025	0.813751
DSEL	1.28779	-1.8927	1.15909	-1.63293	0.102485	0.813965
CYHR1	2.11048	4.5624	2.79588	1.63183	0.102715	0.814087
PRR5	7.89372	3.0147	1.84805	1.63129	0.10283	0.814087
SSH2	7.2784	2.60705	1.59829	1.63115	0.102858	0.814087
PIGK	1.9285	-5.16085	3.16371	-1.63127	0.102834	0.814087
SKI	2.45243	3.83718	2.35404	1.63004	0.103092	0.814519
RIMS2	14.5092	2.95185	1.8109	1.63004	0.103092	0.814519
SRGAP2C	9.72541	3.4292	2.10441	1.62953	0.103201	0.814667
PLEKHG4	2.65684	5.69939	3.50977	1.62387	0.104405	0.815975
NOL8	1.93367	5.48448	3.36972	1.62758	0.103614	0.815975
MAFK	1.53707	5.41007	3.33065	1.62433	0.104306	0.815975
SYNGAP1	2.13341	5.00517	3.08603	1.62188	0.104829	0.815975
RBM41	4.31799	4.6888	2.89224	1.62116	0.104983	0.815975
DNAH7	1.81273	4.38379	2.69525	1.62649	0.103846	0.815975
RAB42	0.913196	4.21792	2.59889	1.62297	0.104596	0.815975
ARL15	4.13605	4.03972	2.49098	1.62174	0.104859	0.815975
CASP16P	1.532	4.03249	2.48209	1.62463	0.104241	0.815975
YIF1B	10.1285	2.7551	1.69309	1.62727	0.10368	0.815975
UBC	85.9737	-1.21146	0.744919	-1.6263	0.103887	0.815975
SPG7	15.2265	-1.97828	1.21999	-1.62156	0.104898	0.815975
BMPR1A	6.65062	-2.0366	1.25275	-1.62571	0.104012	0.815975
FAM122C	8.32413	-2.71006	1.67002	-1.62277	0.104638	0.815975
RBM26	15.8351	-3.08037	1.89829	-1.62271	0.104651	0.815975
CDH12	1.10142	-3.12702	1.92635	-1.62329	0.104528	0.815975
TRIM2	6.45722	-3.33604	2.04892	-1.6282	0.103483	0.815975
SMPDL3A	3.4654	-4.37407	2.6925	-1.62454	0.104261	0.815975
TIMP3	29.7189	-2.98336	1.84087	-1.62063	0.105098	0.816169
GABPB1	1.43348	6.07372	3.75299	1.61837	0.105583	0.818398
ATP6V1C2	2.73067	-2.84949	1.76108	-1.61804	0.105655	0.818398
TGM2	1.66425	-3.06041	1.89087	-1.61852	0.105551	0.818398
NT5C3A	7.97668	-3.9483	2.44105	-1.61746	0.105779	0.818663
TSEN15	4.11843	-4.12133	2.54888	-1.61692	0.105895	0.818864
SAV1	15.9732	4.50396	2.78738	1.61584	0.106129	0.819278
PNMA8A	1.11948	4.13854	2.56098	1.616	0.106095	0.819278
CCP110	1.79725	4.37932	2.7197	1.61022	0.10735	0.820621
SHPRH	4.73558	3.95519	2.4543	1.61154	0.107063	0.820621
POFUT1	3.57517	3.52015	2.1899	1.60745	0.107957	0.820621
PROSER3	1.63968	3.17066	1.97385	1.60634	0.1082	0.820621
HECTD1	14.2466	3.15424	1.9548	1.61358	0.106618	0.820621
GASK1B	18.9349	2.97478	1.85115	1.60699	0.108057	0.820621
MFSD11	10.3019	2.73931	1.7017	1.60975	0.107452	0.820621
C12orf43	4.40349	2.47038	1.53521	1.60915	0.107584	0.820621
MAPKAPK5	16.0819	1.85393	1.15242	1.60873	0.107675	0.820621
HNRNPA1P54	10.7059	1.82659	1.13614	1.60771	0.107899	0.820621
ZNF426	11.0084	-1.73354	1.07674	-1.60999	0.107401	0.820621
TYW5	5.73806	-2.38741	1.47981	-1.61332	0.106675	0.820621
P2RX7	9.18746	-2.42207	1.50764	-1.60653	0.108158	0.820621
SBNO1	5.15615	-2.75079	1.70938	-1.60923	0.107565	0.820621
PSMG3	6.74966	-2.93691	1.82201	-1.61191	0.106981	0.820621
RSBN1L	4.84975	-3.12413	1.938	-1.61204	0.106952	0.820621
C21orf91	10.5525	-3.30709	2.05175	-1.61184	0.106996	0.820621
NSMCE4A	1.55126	-3.75582	2.33011	-1.61186	0.106991	0.820621
SLC25A4	2.45161	-4.18688	2.60371	-1.60804	0.107826	0.820621
FZD6	19.4608	-4.46673	2.77532	-1.60944	0.107519	0.820621
IDUA	2.95882	-5.84443	3.63455	-1.60802	0.107831	0.820621
ATP9A	5.01641	-3.83041	2.3854	-1.60578	0.108323	0.820869
ERC1	1.79263	3.5728	2.22631	1.60481	0.108536	0.821799
EPB41L4A	1.16604	3.96089	2.47038	1.60335	0.108856	0.822853
VASH2	1.47193	-3.56781	2.22513	-1.60342	0.108842	0.822853
AKAP8	1.62493	-4.3013	2.68388	-1.60264	0.109014	0.823358
CNOT6L	6.28612	4.20115	2.62543	1.60017	0.10956	0.823541
DIS3	12.7885	3.38384	2.11621	1.59901	0.109817	0.823541
AFF4	14.2766	3.02703	1.88996	1.60164	0.109236	0.823541
RAF1	12.9167	2.58459	1.61508	1.60028	0.109536	0.823541
ZNF101	6.90028	2.50408	1.56809	1.5969	0.110289	0.823541
YBX1	93.8055	-1.50073	0.938647	-1.59882	0.10986	0.823541
SIN3B	6.16601	-2.58243	1.61724	-1.59681	0.110307	0.823541
NDUFB3	19.178	-2.60946	1.63307	-1.59789	0.110068	0.823541
SLC39A1	8.02475	-3.21587	2.01352	-1.59714	0.110235	0.823541
MYOF	6.72772	-3.50077	2.18842	-1.59968	0.109669	0.823541
PSME3IP1	11.027	-3.55206	2.21838	-1.6012	0.109334	0.823541
SERTAD2	1.74097	-3.86328	2.41829	-1.59752	0.110149	0.823541
SNW1	1.72792	-3.93954	2.46678	-1.59704	0.110257	0.823541
EOMES	3.21469	-5.12704	3.20303	-1.60068	0.109447	0.823541
POPDC3	1.88839	7.07005	4.42952	1.59612	0.110462	0.824021
CYGB	2.01448	3.91431	2.45444	1.59479	0.11076	0.824216
CORO1B	11.0447	3.19328	2.00218	1.5949	0.110734	0.824216
LARS1	9.88268	-3.35729	2.10506	-1.59486	0.110743	0.824216
ACTG1P17	3.12616	2.66715	1.67404	1.59324	0.111106	0.826109
ESF1	3.46802	3.52011	2.21185	1.59147	0.111503	0.828384
HDHD3	1.09163	5.72624	3.59971	1.59075	0.111666	0.828863
KLHL41	0.881396	5.38478	3.39118	1.58788	0.112314	0.828863
ZNF621	3.32125	4.06616	2.55695	1.59024	0.111781	0.828863
FLNB	4.34487	3.85207	2.42766	1.58674	0.112571	0.828863
GTPBP10	1.49412	3.2967	2.07719	1.5871	0.112491	0.828863
ELAPOR1	1.0036	3.03535	1.91121	1.58818	0.112246	0.828863
RPL17	96.9754	-0.968378	0.609768	-1.58811	0.112261	0.828863
SELENOF	21.9271	-2.52893	1.59358	-1.58695	0.112524	0.828863
FAM126B	6.32616	-2.91016	1.83079	-1.58956	0.111934	0.828863
MYORG	3.97441	-3.07057	1.93473	-1.58708	0.112495	0.828863
GABRG2	13.5364	-3.38592	2.13278	-1.58756	0.112385	0.828863
PER2	1.38221	2.94644	1.85748	1.58625	0.112683	0.829015
C5AR2	11.8969	1.62955	1.0278	1.58547	0.112859	0.829644
MPZL1	15.6712	3.00195	1.89636	1.583	0.11342	0.832422
TMA16	3.78544	-4.50956	2.84865	-1.58305	0.113409	0.832422
NPM3	1.19312	-4.62998	2.92716	-1.58173	0.113711	0.833879
AP5M1	2.05992	6.35276	4.01796	1.58109	0.113858	0.834282
BCKDHB	2.83243	-4.00028	2.5309	-1.58058	0.113974	0.834465
PDE10A	4.28166	-4.63168	2.93171	-1.57985	0.11414	0.835006
LRRFIP1	26.647	-1.96911	1.24719	-1.57884	0.114373	0.835797
PHF23	1.20781	-5.67696	3.59624	-1.57858	0.114432	0.835797
RBBP8	5.85771	5.6614	3.60635	1.56984	0.116452	0.836047
IQCE	1.15196	4.62481	2.94581	1.56996	0.116424	0.836047
ZNHIT3	2.70427	4.39555	2.80027	1.56969	0.116488	0.836047
FLOT2	2.65586	3.73084	2.37597	1.57024	0.11636	0.836047
EIF2S1	6.93924	3.66718	2.33558	1.57014	0.116384	0.836047
PHC1	17.3047	3.12413	1.98785	1.57161	0.116041	0.836047
IK	16.5834	2.97474	1.89143	1.57275	0.115777	0.836047
CFAP251	6.12768	2.90221	1.84418	1.57372	0.115553	0.836047
HNRNPA1P40	4.62513	2.15922	1.3719	1.57389	0.115513	0.836047
PSME1	32.6797	-1.71411	1.09213	-1.56952	0.116527	0.836047
PRXL2C	6.27971	-1.79071	1.13716	-1.57472	0.115321	0.836047
KANK2	15.8121	-2.04776	1.29925	-1.5761	0.115002	0.836047
ACTR2	31.1309	-2.04821	1.30224	-1.57284	0.115757	0.836047
EIF3K	7.84542	-2.11468	1.3416	-1.57624	0.114971	0.836047
ZNF90	5.33127	-2.54057	1.61705	-1.57111	0.116157	0.836047
UFD1	6.84209	-2.70481	1.71712	-1.5752	0.11521	0.836047
ZNF470	1.93383	-2.71417	1.72581	-1.57269	0.11579	0.836047
SYNRG	5.84254	-2.78205	1.76851	-1.57311	0.115694	0.836047
PPID	4.52283	-2.86309	1.81658	-1.57609	0.115005	0.836047
CDCP1	3.40542	-2.87869	1.82777	-1.57497	0.115263	0.836047
CHSY1	8.47517	-3.739	2.37521	-1.57418	0.115447	0.836047
STX12	1.44135	-3.76682	2.40035	-1.56928	0.116583	0.836047
SMNDC1	5.56037	-4.50584	2.86995	-1.57	0.116414	0.836047
SEMA6A	1.50705	6.27825	4.01541	1.56354	0.117926	0.83657
ANKRD13C	1.62338	5.85077	3.74663	1.56161	0.118381	0.83657
RCL1	1.33205	4.02201	2.5687	1.56578	0.117401	0.83657
SH3D19	4.80179	3.86014	2.46672	1.56489	0.11761	0.83657
RBM27	10.6114	3.74165	2.39679	1.56111	0.118497	0.83657
AIFM1	2.27906	3.68522	2.35972	1.56172	0.118354	0.83657
GFOD1	1.46776	3.32172	2.12014	1.56675	0.117173	0.83657
CASP10	3.17965	3.20328	2.04921	1.56318	0.11801	0.83657
NAA60	2.89951	3.07376	1.96555	1.56382	0.11786	0.83657
OTUD5	1.2434	3.05476	1.95221	1.56477	0.117637	0.83657
ZNF532	14.6272	2.90061	1.85238	1.56588	0.117376	0.83657
RETREG3	1.7864	2.80579	1.79	1.56748	0.117002	0.83657
ITSN1	15.5458	2.77508	1.77696	1.5617	0.118359	0.83657
SREK1	31.6087	2.64953	1.69606	1.56216	0.11825	0.83657
IHO1	7.10752	2.23806	1.42994	1.56514	0.11755	0.83657
WDR31	3.52696	2.19034	1.40261	1.56162	0.118378	0.83657
MDM4	26.8325	1.98226	1.26397	1.56828	0.116815	0.83657
DDX5	146.872	-1.05846	0.677995	-1.56116	0.118487	0.83657
GOT2	3.3832	-2.58247	1.64986	-1.56527	0.11752	0.83657
ZACN	1.62499	-3.52662	2.2565	-1.56287	0.118083	0.83657
BTBD6	1.87301	4.42808	2.83814	1.5602	0.118712	0.836929
GCNT2	1.1146	-3.8479	2.46642	-1.56012	0.118732	0.836929
ITGB3BP	3.68298	4.55017	2.91875	1.55894	0.11901	0.838235
GSTM4	1.08999	5.56288	3.58408	1.55211	0.120637	0.839986
RNF38	1.47666	5.14236	3.30624	1.55535	0.119863	0.839986
RYK	0.886089	4.8284	3.10797	1.55355	0.120291	0.839986
LIMK2	3.30516	4.48918	2.89388	1.55127	0.120837	0.839986
TXNRD2	2.32896	4.41246	2.83781	1.55488	0.119974	0.839986
HLA-C	4.44945	4.41008	2.84321	1.5511	0.120879	0.839986
ZC3H12C	3.79512	3.96299	2.56049	1.54775	0.121683	0.839986
DYDC1	2.84433	3.23748	2.09204	1.54752	0.121738	0.839986
TAOK3	12.0487	3.17768	2.04301	1.5554	0.119852	0.839986
COA8	1.62269	3.1237	2.01022	1.55391	0.120205	0.839986
CACNB4	4.58248	2.80898	1.81448	1.54809	0.1216	0.839986
MKNK1	7.73449	2.6778	1.72328	1.5539	0.120209	0.839986
TUBA1B	100.8	-1.28482	0.829945	-1.54809	0.121602	0.839986
ZNF814	8.47084	-2.37979	1.53303	-1.55234	0.120581	0.839986
AOPEP	10.3221	-2.61811	1.68765	-1.55133	0.120822	0.839986
PALLD	7.65909	-2.65939	1.71477	-1.55087	0.120932	0.839986
MRS2	4.25306	-2.66461	1.7189	-1.55019	0.121096	0.839986
ARSG	1.91529	-3.01008	1.94313	-1.54909	0.12136	0.839986
ETV6	6.39357	-3.24401	2.09283	-1.55006	0.121127	0.839986
INTS10	8.44741	-3.28882	2.12532	-1.54745	0.121754	0.839986
ABCA1	2.44878	-3.33038	2.1418	-1.55495	0.119959	0.839986
MAN2B1	4.84929	-3.4201	2.20658	-1.54995	0.121153	0.839986
SGCE	9.54937	-3.71999	2.39761	-1.55154	0.120773	0.839986
AGO4	3.1624	-3.85836	2.48673	-1.55158	0.120763	0.839986
EXOSC9	3.65652	-4.13136	2.66343	-1.55114	0.120868	0.839986
COPRS	4.28917	-4.35019	2.80764	-1.54941	0.121283	0.839986
USP3	2.04725	-4.52908	2.91827	-1.55198	0.120668	0.839986
SART1	2.7329	4.87925	3.15538	1.54633	0.122025	0.840576
DPP8	13.8098	3.17639	2.05391	1.54651	0.121981	0.840576
RHOQ	22.5936	-2.33151	1.50829	-1.5458	0.122154	0.840825
UHRF2	1.11744	4.56261	2.95585	1.54359	0.122689	0.843868
ANKRD16	0.849408	-3.61254	2.34098	-1.54318	0.122788	0.843912
RAB11B	8.71185	-2.79609	1.81247	-1.54269	0.122905	0.844081
STIM2	2.13025	4.37218	2.83774	1.54073	0.123383	0.846557
EFCAB12	1.07769	3.33294	2.16568	1.53899	0.123808	0.846557
ZNF444	7.17183	3.11515	2.02329	1.53964	0.123647	0.846557
CALCOCO2	15.6384	-2.39169	1.55348	-1.53957	0.123665	0.846557
MEAF6	14.0934	-2.71407	1.76239	-1.53999	0.123562	0.846557
ZNF195	1.67193	-3.00238	1.95098	-1.53891	0.123825	0.846557
RNH1	19.303	-2.75318	1.79057	-1.5376	0.124146	0.848112
ADNP2	9.39729	4.00431	2.60997	1.53423	0.124972	0.848687
AK7	1.05153	3.75838	2.44783	1.53539	0.124688	0.848687
CHD6	6.83754	3.60296	2.34899	1.53383	0.125071	0.848687
RAD51D	3.9262	2.88558	1.8776	1.53685	0.12433	0.848687
SCRG1	1.39417	2.44981	1.59697	1.53404	0.12502	0.848687
DCAF7	24.1634	-2.32737	1.51512	-1.53609	0.124516	0.848687
S100A16	10.0429	-2.34462	1.52755	-1.5349	0.124809	0.848687
RASSF5	3.16118	-3.50049	2.28113	-1.53454	0.124897	0.848687
NCLN	3.48771	-4.03786	2.63157	-1.53439	0.124934	0.848687
ANKRD52	1.97687	5.54667	3.63572	1.5256	0.127109	0.849509
KCP	0.960311	5.34987	3.50236	1.52751	0.126635	0.849509
FAM114A2	2.3931	5.01704	3.28272	1.52832	0.126433	0.849509
CLK2	1.71024	4.64788	3.03789	1.52997	0.126024	0.849509
XPR1	1.08998	4.1077	2.68777	1.52829	0.126441	0.849509
MRO	1.01469	3.74027	2.44265	1.53123	0.125711	0.849509
EPG5	4.18626	3.70383	2.42169	1.52944	0.126156	0.849509
PTOV1	6.0904	3.13146	2.05282	1.52545	0.127148	0.849509
GNG2	9.838	3.00835	1.97215	1.52542	0.127155	0.849509
ALDH1B1	10.9742	2.75576	1.80302	1.52842	0.126409	0.849509
B2M	1522.34	-0.883131	0.578407	-1.52683	0.126803	0.849509
TXNIP	151.522	-1.24772	0.814264	-1.53233	0.125441	0.849509
HNRNPL	26.4989	-1.54504	1.00919	-1.53097	0.125777	0.849509
ZNF396	7.63188	-2.98656	1.95661	-1.52639	0.126912	0.849509
NEK7	16.088	-3.22313	2.10386	-1.53201	0.125519	0.849509
MCMBP	8.45996	-3.56736	2.32862	-1.53197	0.125531	0.849509
POLG	2.45592	-3.89151	2.54673	-1.52804	0.126503	0.849509
FAM8A1	3.59254	-3.97909	2.6082	-1.52561	0.127108	0.849509
ARL14EP	1.25118	-4.14698	2.7159	-1.52693	0.126779	0.849509
TIMM8B	5.57163	-4.45808	2.92101	-1.52621	0.126957	0.849509
CEPT1	1.81417	-4.80783	3.14537	-1.52854	0.126378	0.849509
ZNF609	4.62688	4.30005	2.82303	1.5232	0.127708	0.850441
USP12	5.14706	3.77446	2.47894	1.52261	0.127856	0.850441
AZI2	13.6284	3.49176	2.29268	1.523	0.127759	0.850441
MRPS25	20.5078	3.12301	2.05085	1.52279	0.12781	0.850441
CHMP2A	3.10157	2.99519	1.96525	1.52408	0.12749	0.850441
TOMM6	7.30717	-2.79852	1.83717	-1.52328	0.127689	0.850441
ZNF397	7.56492	-2.00695	1.31947	-1.52103	0.128253	0.850676
SEM1	29.4518	-2.03448	1.33707	-1.52159	0.128111	0.850676
AIDA	8.63254	-3.01628	1.98278	-1.52124	0.1282	0.850676
PDPR	5.05814	-3.21468	2.11357	-1.52097	0.128266	0.850676
UBQLN1	24.8754	3.01554	1.98468	1.51941	0.128661	0.85267
CYC1	1.691	-3.73902	2.46286	-1.51816	0.128974	0.8535
MYO7A	3.06304	-4.45967	2.93697	-1.51846	0.128898	0.8535
ITGAX	4.97647	-2.62152	1.72749	-1.51753	0.129133	0.853933
TBC1D1	2.81769	-4.2491	2.80164	-1.51665	0.129355	0.854781
TRAF7	2.63862	4.32003	2.85338	1.514	0.130025	0.856159
ZKSCAN5	1.09836	4.08174	2.69608	1.51395	0.130038	0.856159
VASP	4.75054	3.07221	2.02975	1.51359	0.130129	0.856159
GSTM3	3.18684	2.7525	1.8173	1.51461	0.129872	0.856159
DSTN	21.3495	2.03215	1.34168	1.51463	0.129866	0.856159
UCP2	9.70526	-3.18983	2.10609	-1.51457	0.12988	0.856159
HMGN2	38.4443	-1.54092	1.01857	-1.51282	0.130326	0.856834
TIGAR	3.77069	2.66194	1.76094	1.51165	0.130622	0.858158
EPHX2	0.925022	5.79529	3.83594	1.51079	0.130843	0.858989
AXIN1	1.36198	4.70593	3.1172	1.50966	0.131129	0.859471
RGPD6	3.6735	4.48155	2.96841	1.50975	0.131107	0.859471
ZNF562	19.2007	1.57539	1.04373	1.50939	0.1312	0.859471
ACO2	3.06739	2.78333	1.84556	1.50812	0.131523	0.860962
MAP2K4	1.41321	3.74152	2.48251	1.50716	0.131771	0.861424
BRD2	5.9972	3.42687	2.27399	1.50698	0.131815	0.861424
CCDC71L	12.3054	3.2862	2.181	1.50674	0.131878	0.861424
POLR1D	12.0313	-3.16734	2.10359	-1.50569	0.132148	0.862569
CLVS1	5.62078	-2.83895	1.88607	-1.50522	0.132268	0.862733
USP32	1.65234	5.67852	3.77595	1.50387	0.132616	0.863748
MORC3	1.74594	3.17529	2.11296	1.50277	0.132899	0.863748
FSD1	2.94278	3.12123	2.0767	1.50297	0.132846	0.863748
TSPYL1	5.3735	2.78268	1.85083	1.50348	0.132717	0.863748
ACIN1	31.1148	-2.35092	1.56295	-1.50415	0.132542	0.863748
SGTA	1.90733	4.45394	2.96605	1.50164	0.133189	0.864483
BCL2L2-PABPN1	2.01796	3.16069	2.10644	1.50049	0.133488	0.864483
PIM3	10.7031	2.49936	1.66555	1.50062	0.133453	0.864483
NCL	54.1924	-1.50988	1.00624	-1.50052	0.133479	0.864483
RAB8A	6.48651	-2.76204	1.84002	-1.50109	0.133332	0.864483
C1R	37.2481	-1.85563	1.23706	-1.50003	0.133606	0.864632
PACS2	7.09104	2.02176	1.34835	1.49944	0.133759	0.865009
KYAT3	1.09946	5.32244	3.55198	1.49844	0.134018	0.865601
THUMPD1	13.7147	-2.25387	1.50423	-1.49835	0.134042	0.865601
MIEF1	1.12544	3.59278	2.4016	1.496	0.134654	0.866358
MED10	15.8905	3.30441	2.21014	1.49512	0.134884	0.866358
ACOT13	10.3729	2.50467	1.67293	1.49717	0.134348	0.866358
PPM1F	6.89569	2.37465	1.58732	1.49601	0.134651	0.866358
ZNF891	3.98985	-1.81364	1.2134	-1.49467	0.135	0.866358
TPM4	21.6107	-1.83548	1.22676	-1.49621	0.1346	0.866358
AACS	19.9743	-2.24838	1.5047	-1.49424	0.135112	0.866358
ACSL6	9.5911	-2.30744	1.54406	-1.49439	0.135074	0.866358
PLA2G4C	3.43835	-2.85571	1.90891	-1.49599	0.134657	0.866358
COL4A1	12.5874	-4.09425	2.73742	-1.49566	0.134742	0.866358
EMC8	1.09204	4.90907	3.28785	1.4931	0.135412	0.867668
CLOCK	1.75255	5.18375	3.48145	1.48896	0.136498	0.867756
ANKRA2	1.58653	5.0586	3.39438	1.49029	0.136149	0.867756
C1QTNF1	1.94572	5.05529	3.41648	1.47968	0.138959	0.867756
EML1	1.31748	4.5288	3.05254	1.48362	0.13791	0.867756
LZTFL1	1.36374	4.15286	2.80064	1.48282	0.138121	0.867756
STXBP4	2.27732	3.41811	2.3027	1.4844	0.137704	0.867756
NLRC3	2.55974	3.37834	2.2673	1.49003	0.136217	0.867756
ZNF669	1.41726	3.32237	2.22998	1.48987	0.136259	0.867756
SLC7A14	1.30581	3.27532	2.20616	1.48462	0.137644	0.867756
TXNDC11	5.44303	3.25561	2.18975	1.48675	0.137081	0.867756
ESYT1	2.89046	3.22365	2.16535	1.48874	0.136556	0.867756
NSL1	7.21449	3.17696	2.13093	1.49088	0.135993	0.867756
RNF2	2.75105	3.16236	2.13698	1.47982	0.13892	0.867756
CTDSPL2	4.15028	3.06834	2.05831	1.49071	0.136038	0.867756
TMEM9B	2.93181	3.03765	2.04936	1.48224	0.138276	0.867756
ZNF385C	1.61993	2.99897	2.01516	1.4882	0.136697	0.867756
RCAN1	15.9116	2.65029	1.7831	1.48633	0.137191	0.867756
RAB4B	12.1977	2.40123	1.61824	1.48385	0.137848	0.867756
RPS13	81.6201	-1.07391	0.723067	-1.48522	0.137487	0.867756
S100A11	72.8167	-1.31378	0.882141	-1.48931	0.136405	0.867756
NPC2	66.5522	-1.39297	0.934518	-1.49057	0.136073	0.867756
MORF4L1	38.5798	-1.44967	0.976854	-1.48402	0.137804	0.867756
SRSF5	40.224	-1.51797	1.02542	-1.48035	0.138781	0.867756
WARS1	37.7706	-1.69216	1.1406	-1.48357	0.137924	0.867756
NSG1	42.2318	-1.83141	1.2365	-1.48113	0.138572	0.867756
CLCN2	4.09238	-2.53996	1.71551	-1.48058	0.138717	0.867756
RDH11	14.9876	-2.66563	1.79847	-1.48217	0.138296	0.867756
PBRM1	8.6899	-2.71557	1.83103	-1.48308	0.138053	0.867756
SLC25A39	10.5203	-2.85226	1.9229	-1.48331	0.137993	0.867756
SIAE	2.42312	-3.30192	2.22389	-1.48475	0.137611	0.867756
CIB1	1.15779	-3.45307	2.32233	-1.4869	0.13704	0.867756
CASK	1.25154	-3.52119	2.36067	-1.4916	0.135803	0.867756
FRMD4A	6.66943	-3.53927	2.37999	-1.48709	0.136991	0.867756
OR10H1	3.89386	-3.67814	2.47521	-1.48599	0.137282	0.867756
DNAJC1	3.87192	-4.02602	2.71889	-1.48076	0.138671	0.867756
ZDHHC7	3.28328	-4.11102	2.77436	-1.48179	0.138396	0.867756
VPS37A	1.86403	-7.32314	4.90882	-1.49183	0.135743	0.867756
PEA15	17.396	2.27157	1.536	1.47889	0.139171	0.868479
LIN54	4.05534	3.76301	2.54532	1.47841	0.139299	0.868494
ANAPC7	7.32099	3.30932	2.24043	1.47709	0.139651	0.868494
SEPTIN10	2.27953	3.29311	2.22913	1.47731	0.139593	0.868494
DSG2	9.8205	2.6863	1.81784	1.47774	0.139477	0.868494
VAMP8	4.6178	-3.22496	2.18328	-1.47712	0.139644	0.868494
SPAG7	2.78437	2.44593	1.65645	1.47661	0.139781	0.86871
NUDT14	2.4333	4.50052	3.05253	1.47436	0.140386	0.870944
INSYN1	2.11187	3.25946	2.21101	1.4742	0.140429	0.870944
SLC1A4	8.41344	3.05267	2.07061	1.47429	0.140404	0.870944
OGFRL1	2.54853	-3.34564	2.27138	-1.47296	0.140763	0.872423
ATP5F1D	5.59072	2.71443	1.84433	1.47177	0.141082	0.87321
INPP4B	20.3806	-3.06624	2.08291	-1.4721	0.140995	0.87321
POLR3K	7.8569	-2.26392	1.53998	-1.4701	0.141535	0.875417
EML4	4.39455	3.69667	2.5192	1.4674	0.142268	0.876371
CREBBP	18.7859	2.2649	1.54275	1.46809	0.142079	0.876371
TPM3	33.1193	-1.49487	1.01823	-1.4681	0.142077	0.876371
BBIP1	19.6143	-2.43043	1.65572	-1.4679	0.142132	0.876371
GTPBP2	1.42266	-3.12894	2.13231	-1.4674	0.142268	0.876371
FHIT	1.60489	-5.06616	3.44954	-1.46865	0.141929	0.876371
FGD5P1	2.89276	2.9144	1.98876	1.46544	0.142802	0.879062
SPATA1	1.72716	6.47889	4.42649	1.46366	0.143287	0.881014
NETO2	2.63426	2.44143	1.66814	1.46357	0.143313	0.881014
MTMR9	5.0218	2.92825	2.00223	1.46249	0.143606	0.881489
RPLP0	81.924	-0.912479	0.624037	-1.46222	0.143681	0.881489
SEPTIN2	48.3111	-1.60303	1.09617	-1.46239	0.143636	0.881489
G2E3	0.892399	5.15644	3.52848	1.46138	0.143912	0.882313
MAP3K7	3.01175	4.13006	2.83205	1.45833	0.14475	0.883354
UPF1	2.65711	3.6232	2.48411	1.45855	0.144689	0.883354
GTF2E1	1.89655	3.30644	2.26482	1.45991	0.144315	0.883354
TTF2	3.57074	2.74702	1.88266	1.45911	0.144534	0.883354
ACOT7	5.64031	-2.85044	1.95372	-1.45898	0.144572	0.883354
GTF2H5	7.42074	-3.19812	2.19308	-1.45828	0.144763	0.883354
METRN	2.38264	-5.62831	3.85599	-1.45963	0.144392	0.883354
HINT2	1.22612	6.20778	4.2667	1.45494	0.145686	0.883649
BACH1	6.82704	5.18361	3.55864	1.45663	0.14522	0.883649
SPIN1	3.66547	3.44541	2.36768	1.45519	0.145618	0.883649
C19orf12	4.63661	3.03948	2.08704	1.45636	0.145293	0.883649
CREB3L2	11.5153	2.66232	1.82779	1.45658	0.145234	0.883649
ZNF383	3.83822	2.59918	1.78584	1.45544	0.145548	0.883649
YY1	18.7191	-2.04069	1.40198	-1.45558	0.145509	0.883649
NDUFAB1	11.6729	-2.48029	1.7039	-1.45566	0.145488	0.883649
OR10G3	0.977265	-3.17574	2.17884	-1.45754	0.144968	0.883649
CAMK2D	1.70284	-4.60777	3.16835	-1.45431	0.14586	0.884109
BBS4	3.32238	3.63948	2.50548	1.45261	0.146332	0.885284
AGMAT	1.16921	-2.69986	1.85898	-1.45233	0.146409	0.885284
TCEAL9	9.71079	-2.86378	1.97181	-1.45236	0.146401	0.885284
SH3KBP1	1.87376	-3.68056	2.53446	-1.45221	0.146443	0.885284
GPRC5C	5.91133	3.66403	2.52569	1.4507	0.146863	0.886054
ETFA	4.75054	2.92044	2.01261	1.45107	0.14676	0.886054
DUT	42.556	2.04546	1.40986	1.45082	0.14683	0.886054
OCLN	1.25312	3.90152	2.69008	1.45034	0.146965	0.886081
PTRH2	3.27475	5.05934	3.49097	1.44926	0.147264	0.886325
ALG10B	2.39447	3.93183	2.71191	1.44984	0.147103	0.886325
TTL	9.00898	-2.30419	1.59004	-1.44914	0.147298	0.886325
MTDH	26.6793	2.05567	1.41957	1.44809	0.147592	0.886624
FBXL20	10.4986	-1.85884	1.28349	-1.44828	0.147539	0.886624
GDE1	1.55561	-3.19801	2.2087	-1.44792	0.147641	0.886624
LSM4	1.99489	-2.98642	2.06416	-1.4468	0.147954	0.887921
PTBP3	9.08266	-3.13258	2.16638	-1.446	0.148178	0.888674
VANGL2	1.67313	4.69254	3.24762	1.44492	0.148481	0.888737
MXI1	13.4399	-3.19782	2.21281	-1.44514	0.148417	0.888737
GCFC2	1.6771	-4.69399	3.24856	-1.44495	0.148473	0.888737
SF3A3	2.78273	3.56608	2.47122	1.44305	0.149008	0.8913
RABAC1	3.02813	-3.35892	2.32887	-1.44229	0.14922	0.89198
IFT52	1.22574	4.27349	2.96515	1.44124	0.149518	0.892001
UBE2V2	9.24385	2.77795	1.92671	1.44181	0.149356	0.892001
SEL1L	10.717	-3.34358	2.31993	-1.44124	0.149517	0.892001
THOC2	24.6308	2.80063	1.94445	1.44032	0.149777	0.892961
PRR19	1.81739	2.86192	1.98795	1.43963	0.149971	0.893532
EYS	3.80047	2.79499	1.94248	1.43888	0.150184	0.893631
RAB3D	4.81663	-2.96172	2.05803	-1.43911	0.15012	0.893631
STXBP6	7.47523	4.52874	3.14929	1.43802	0.150429	0.894501
RAC1	113.537	-1.42327	0.990183	-1.43738	0.15061	0.894993
MTHFD1	50.2455	-1.83096	1.27468	-1.43641	0.150886	0.895536
PYHIN1	4.51965	-2.85706	1.98909	-1.43636	0.150899	0.895536
PIK3CD	13.0686	2.19023	1.52584	1.43543	0.151164	0.896137
ZNF273	11.9978	2.17818	1.51756	1.43532	0.151197	0.896137
ZNF250	0.995839	4.24343	2.95814	1.43449	0.151433	0.896947
RRAGB	2.21798	5.48719	3.8371	1.43003	0.152708	0.897069
FAM189B	1.44053	4.45598	3.10857	1.43345	0.151729	0.897069
DOC2A	1.17975	4.20376	2.93538	1.4321	0.152114	0.897069
KCTD10	0.939119	3.89292	2.71831	1.43211	0.152112	0.897069
PHF5A	0.915977	3.74767	2.62556	1.42738	0.15347	0.897069
TUFT1	2.9453	3.04995	2.12687	1.43401	0.15157	0.897069
HACD2	13.1464	2.85562	2.00184	1.4265	0.153724	0.897069
SNX8	13.9192	2.7199	1.90322	1.4291	0.152975	0.897069
MYADM	12.6714	2.36935	1.65961	1.42765	0.153392	0.897069
KCNK6	14.6515	-1.65933	1.15989	-1.4306	0.152546	0.897069
F2R	9.99748	-2.20481	1.54135	-1.43044	0.152591	0.897069
C1QC	11.1828	-2.22984	1.55666	-1.43246	0.152013	0.897069
ABHD17A	8.19105	-2.45521	1.72076	-1.42681	0.153633	0.897069
HFE	2.108	-2.5515	1.78091	-1.43269	0.151945	0.897069
GNL3L	20.1746	-2.58722	1.81298	-1.42705	0.153565	0.897069
SH3PXD2A	19.5277	-2.76155	1.93305	-1.4286	0.15312	0.897069
SPIN3	5.9818	-2.83547	1.98136	-1.43107	0.152409	0.897069
CSF1	6.17094	-3.17499	2.2244	-1.42735	0.15348	0.897069
FGD4	1.62574	-3.17956	2.22828	-1.42691	0.153605	0.897069
IGLC2	706.957	-3.24969	2.27561	-1.42806	0.153276	0.897069
SLCO2B1	6.68762	-3.37919	2.36299	-1.43005	0.152703	0.897069
PSMD14	3.09563	-3.48048	2.43791	-1.42765	0.153392	0.897069
NBPF1	2.28675	-4.6359	3.24516	-1.42856	0.153131	0.897069
ZNF320	5.69949	3.58841	2.51657	1.42591	0.153893	0.897481
WDR36	1.44824	4.74454	3.33401	1.42307	0.154715	0.898127
ZDHHC17	5.61573	3.57503	2.5102	1.4242	0.154388	0.898127
DCBLD1	2.20459	3.18413	2.23829	1.42257	0.154859	0.898127
APOBEC3A	1.05194	3.01	2.11562	1.42275	0.154807	0.898127
FAM227A	1.38041	2.731	1.91867	1.42338	0.154626	0.898127
FAF1	7.28089	2.58343	1.81567	1.42285	0.154779	0.898127
OPHN1	54.9201	1.05011	0.738239	1.42246	0.154894	0.898127
MCMDC2	19.9324	-2.07288	1.45525	-1.42442	0.154325	0.898127
APOO	9.55949	-4.08972	2.87295	-1.42353	0.154584	0.898127
RNF24	3.55113	2.61566	1.83943	1.42199	0.155028	0.898331
PAG1	18.2135	-2.02051	1.42138	-1.42151	0.15517	0.89858
STMN3	2.05834	3.8523	2.71068	1.42115	0.155272	0.898602
PAQR3	0.878351	4.29466	3.02329	1.42053	0.155455	0.899085
MID1	1.866	4.38319	3.09041	1.41832	0.156098	0.901081
ZCCHC24	0.900077	4.14968	2.92573	1.41834	0.156092	0.901081
MOGS	7.44747	-3.78091	2.66531	-1.41856	0.156026	0.901081
PPP1R13L	11.0324	2.64027	1.86282	1.41735	0.15638	0.902141
TRMT1	2.33116	5.01361	3.54994	1.41231	0.15786	0.90367
WWP1	1.25841	4.93808	3.49122	1.41443	0.157236	0.90367
SMG5	3.054	3.46739	2.45007	1.41522	0.157003	0.90367
YRDC	3.64796	3.26993	2.31131	1.41475	0.157141	0.90367
NEK5	3.1735	2.70126	1.90956	1.4146	0.157186	0.90367
TADA2B	8.06715	2.65217	1.87739	1.41269	0.157746	0.90367
DHODH	2.89489	2.39824	1.69604	1.41402	0.157355	0.90367
PDHX	2.9489	2.37723	1.68245	1.41296	0.157668	0.90367
ME2	12.669	-1.47785	1.04575	-1.4132	0.157598	0.90367
POLR2A	10.3123	-2.36567	1.67081	-1.41588	0.156809	0.90367
BAZ2A	19.4439	-2.47927	1.75581	-1.41204	0.157938	0.90367
AHCYL2	15.588	-2.59153	1.83373	-1.41325	0.157581	0.90367
MTARC1	1.16633	-4.25538	3.00866	-1.41438	0.157251	0.90367
SF3B1	29.6392	-1.78173	1.26282	-1.41091	0.158272	0.9049
IMPACT	1.1327	-4.46791	3.1673	-1.41063	0.158352	0.9049
PPWD1	1.23024	-3.56458	2.52782	-1.41014	0.158498	0.90516
BLOC1S2	3.46845	2.85205	2.02432	1.40889	0.158868	0.905689
IL17RA	3.38009	2.84737	2.02111	1.40882	0.158889	0.905689
PDLIM1	11.9651	-2.78396	1.97516	-1.40948	0.158692	0.905689
FBXO41	1.67275	6.32963	4.49641	1.40771	0.159218	0.906474
TAB2	4.35346	-3.25906	2.31521	-1.40768	0.159227	0.906474
SUPT5H	9.64947	-2.50935	1.7831	-1.40729	0.159341	0.906556
B4GAT1	1.94615	-3.75918	2.67259	-1.40657	0.159556	0.906644
CISD1	1.244	-3.7781	2.68556	-1.40682	0.15948	0.906644
SIK1	14.4539	3.45087	2.45436	1.40602	0.15972	0.907008
MTCO1P40	3.49957	-0.983159	0.69968	-1.40516	0.159975	0.90789
SON	108.988	1.64206	1.1691	1.40455	0.160156	0.908351
ID4	1.40423	3.62399	2.58093	1.40414	0.160277	0.908471
ACER3	8.49793	-1.53335	1.0924	-1.40365	0.160424	0.908737
VWA5A	1.12925	5.43003	3.89926	1.39258	0.163746	0.909879
TENT4B	1.17948	4.71808	3.37073	1.39972	0.161597	0.909879
MICAL2	2.63934	4.42895	3.1832	1.39135	0.164119	0.909879
TAF15	1.61288	3.71012	2.66281	1.39331	0.163525	0.909879
KCNC4	2.03958	3.54124	2.53587	1.39646	0.162576	0.909879
REST	1.32457	3.5169	2.52704	1.39171	0.164011	0.909879
SECISBP2	7.16779	3.32514	2.37729	1.39871	0.1619	0.909879
TM9SF1	1.67372	3.31817	2.37358	1.39796	0.162126	0.909879
KIF3B	4.65455	3.17935	2.27328	1.39857	0.161941	0.909879
ZNF772	1.26901	3.06908	2.20269	1.39333	0.16352	0.909879
KIAA0513	2.33526	2.85828	2.05398	1.39158	0.16405	0.909879
RPS6KB2	9.64743	2.79375	1.99361	1.40135	0.161109	0.909879
ANKFY1	10.4381	2.47304	1.7639	1.40203	0.160907	0.909879
HES2	7.67796	2.36153	1.68771	1.39925	0.161738	0.909879
SCAMP4	7.62102	2.03689	1.46271	1.39254	0.163759	0.909879
RRP12	14.5329	1.78708	1.28392	1.39189	0.163955	0.909879
SYAP1	17.8853	1.59185	1.14415	1.39129	0.164138	0.909879
TMSB10	194.106	-0.782561	0.560651	-1.39581	0.162772	0.909879
OXA1L	27.5282	-1.72143	1.23039	-1.39909	0.161786	0.909879
NPHP3	7.66359	-2.13458	1.52653	-1.39832	0.162016	0.909879
SNRPC	9.65699	-2.17715	1.56259	-1.3933	0.163529	0.909879
RNF141	6.26306	-2.56786	1.8401	-1.3955	0.162865	0.909879
ZSWIM1	1.3548	-2.63116	1.88427	-1.39638	0.162601	0.909879
FMN1	37.5417	-2.63824	1.88583	-1.39898	0.161819	0.909879
GRK2	8.15806	-2.64021	1.89517	-1.39312	0.163582	0.909879
RFX5	14.8803	-2.76937	1.98468	-1.39537	0.162903	0.909879
RAB3GAP2	4.65045	-2.84087	2.03019	-1.39931	0.16172	0.909879
MPP5	1.00767	-2.84731	2.04286	-1.39379	0.163382	0.909879
GNE	6.05267	-3.02723	2.16012	-1.40141	0.16109	0.909879
SCAF1	2.81634	-3.31398	2.37685	-1.39428	0.163234	0.909879
CIAO2B	3.09066	-3.38407	2.41551	-1.40097	0.161222	0.909879
TTC14	32.5089	-3.38675	2.42415	-1.39709	0.162387	0.909879
IGFLR1	1.25535	-3.85209	2.76933	-1.39098	0.164231	0.909879
TIMM23	1.43408	-4.14889	2.98229	-1.39117	0.164173	0.909879
SEC23B	9.91314	-4.64473	3.32705	-1.39605	0.162699	0.909879
ABHD6	2.44432	-4.66733	3.35488	-1.39121	0.164163	0.909879
RABGAP1	7.32867	3.09285	2.22449	1.39037	0.164418	0.910309
COL24A1	8.86706	2.91412	2.09689	1.38974	0.164609	0.910309
MECOM	2.54329	-1.48231	1.06652	-1.38986	0.164572	0.910309
TRIP10	3.07856	4.14334	2.98533	1.3879	0.165167	0.910623
SDHAF2	1.05958	3.6647	2.64029	1.38799	0.16514	0.910623
VWCE	2.55162	3.16217	2.27623	1.38921	0.164768	0.910623
PLP1	40.8892	-1.59166	1.14638	-1.38842	0.165009	0.910623
ETFRF1	1.7246	-4.58333	3.30213	-1.38799	0.165139	0.910623
DAPK1	11.8828	-2.43243	1.7531	-1.3875	0.165288	0.91074
DIPK1C	1.75305	5.68171	4.13165	1.37517	0.16908	0.911289
KDM7A	2.08963	4.93159	3.59285	1.37261	0.169873	0.911289
AHDC1	2.20995	4.53684	3.28157	1.38252	0.166811	0.911289
DNAJC24	2.46408	4.36649	3.17788	1.37402	0.169434	0.911289
MCM6	2.51191	4.27799	3.11714	1.37241	0.169936	0.911289
FBXO21	1.19443	4.16426	3.02511	1.37657	0.168646	0.911289
DPYD	1.19564	4.1141	2.98602	1.37779	0.168269	0.911289
ME3	4.34925	3.81528	2.76166	1.38151	0.167121	0.911289
PIK3R2	4.88706	3.77646	2.73566	1.38046	0.167447	0.911289
OSBPL3	13.0856	3.77256	2.74831	1.37268	0.169851	0.911289
HDAC4	2.39853	3.70521	2.69457	1.37507	0.16911	0.911289
MOGAT3	0.941053	3.70072	2.69004	1.37571	0.168911	0.911289
UPF2	2.8312	3.66746	2.66823	1.37449	0.169289	0.911289
RANBP10	2.34089	3.50424	2.54572	1.37652	0.16866	0.911289
PTGES3L	1.88506	3.30621	2.40806	1.37298	0.16976	0.911289
DBF4B	1.74488	3.11088	2.25384	1.38026	0.167506	0.911289
CFAP221	1.5441	3.08813	2.25023	1.37236	0.16995	0.911289
NAV2	18.8443	3.00412	2.18259	1.3764	0.168698	0.911289
STRN3	4.76792	3.00009	2.16834	1.38359	0.166484	0.911289
RAB11FIP4	5.71735	2.7334	1.98411	1.37764	0.168314	0.911289
ARHGAP17	4.6211	2.51926	1.82437	1.3809	0.167311	0.911289
C12orf76	20.9688	2.453	1.77663	1.3807	0.167371	0.911289
TSR2	2.64076	2.39391	1.72998	1.38378	0.166427	0.911289
INMT	4.33609	2.23982	1.6315	1.37286	0.169796	0.911289
RETREG2	7.8855	2.15406	1.56671	1.37489	0.169165	0.911289
ATCAY	5.14757	1.99414	1.44917	1.37606	0.168802	0.911289
YWHAZ	69.1339	-1.16607	0.848648	-1.37404	0.169431	0.911289
RPL24	36.7113	-1.49266	1.08505	-1.37566	0.168927	0.911289
DBI	34.6185	-1.53225	1.11148	-1.37857	0.168028	0.911289
PYGL	23.5503	-2.11119	1.52565	-1.38379	0.166422	0.911289
SNX10	16.1276	-2.20912	1.5993	-1.3813	0.167186	0.911289
QSOX1	15.4501	-2.33801	1.68586	-1.38683	0.165494	0.911289
CCDC180	3.98748	-2.39412	1.73691	-1.37838	0.168087	0.911289
CYFIP1	29.1092	-2.51417	1.81612	-1.38436	0.166248	0.911289
ELOF1	1.9957	-2.60034	1.8857	-1.37898	0.1679	0.911289
CMIP	7.56905	-2.69738	1.94972	-1.38347	0.166522	0.911289
KIFC3	4.30553	-2.7178	1.96444	-1.3835	0.166513	0.911289
HINT3	2.02563	-3.15252	2.29149	-1.37575	0.1689	0.911289
RHOC	2.10813	-3.23566	2.34092	-1.38222	0.166905	0.911289
SH3BP4	6.44988	-3.23833	2.34093	-1.38335	0.166558	0.911289
POLH	3.62763	-3.28984	2.3975	-1.3722	0.170002	0.911289
EXOC3	2.45903	-3.34439	2.41254	-1.38625	0.16567	0.911289
RDH5	2.02437	-3.49707	2.52318	-1.38598	0.165754	0.911289
ELK3	1.46077	-4.09251	2.96836	-1.37871	0.167985	0.911289
CENPC	1.35588	-4.10937	2.97288	-1.38228	0.166884	0.911289
CTLA4	1.05531	-4.60319	3.34809	-1.37487	0.169171	0.911289
KCNG1	2.51168	3.84226	2.80201	1.37125	0.170296	0.911904
CC2D1B	1.29339	-2.95288	2.15352	-1.37119	0.170317	0.911904
USP22	22.9542	1.78426	1.30172	1.37069	0.170472	0.911944
CAT	8.12243	-3.12118	2.27737	-1.37052	0.170525	0.911944
MKS1	0.984545	5.00858	3.65821	1.36913	0.170958	0.912619
NAIP	4.51899	4.4445	3.24747	1.3686	0.171123	0.912619
KLHL7	0.943154	3.93218	2.87603	1.36722	0.171555	0.912619
ASCC2	5.06123	2.85431	2.08632	1.36811	0.171278	0.912619
CFAP54	18.5898	-1.36098	0.995291	-1.36742	0.171495	0.912619
ABCB5	21.0461	-2.03095	1.48396	-1.3686	0.171125	0.912619
STX8	6.72409	-2.08666	1.52501	-1.36829	0.171222	0.912619
GALNT2	8.47303	-2.57178	1.88076	-1.36742	0.171495	0.912619
TRPM3	1.48269	-2.9989	2.19249	-1.3678	0.171373	0.912619
ZNF518B	1.11048	4.94218	3.61705	1.36636	0.171827	0.913528
NR4A3	1.16556	6.08335	4.45706	1.36488	0.172292	0.913575
MED31	1.33163	5.55385	4.06606	1.3659	0.171969	0.913575
PWP1	1.46544	4.35046	3.18868	1.36434	0.17246	0.913575
COX19	1.1337	4.08638	2.99374	1.36497	0.172261	0.913575
PREP	2.19139	3.20433	2.34818	1.3646	0.172378	0.913575
USP6NL	18.2635	2.14475	1.57159	1.3647	0.172349	0.913575
CRIP2	1.2878	-3.91406	2.86936	-1.36409	0.17254	0.913575
RCC1L	1.38207	4.79452	3.51657	1.36341	0.172753	0.914175
ZNF813	1.10347	2.8039	2.05716	1.36299	0.172884	0.914335
MICU2	8.29278	3.71232	2.7288	1.36042	0.173697	0.914384
WASL	13.4708	3.08711	2.26661	1.36199	0.1732	0.914384
DGKZ	15.6401	2.54405	1.86816	1.36179	0.173264	0.914384
RBM47	22.8487	-1.23946	0.910653	-1.36106	0.173493	0.914384
N4BP2L2	168.46	-1.7045	1.25309	-1.36024	0.173755	0.914384
SPTBN1	12.77	-1.96709	1.44628	-1.3601	0.173799	0.914384
RPS4Y1	9.60914	-2.17522	1.59916	-1.36022	0.173759	0.914384
RASSF1	1.64052	-3.81108	2.7994	-1.36139	0.17339	0.914384
CDK17	1.12648	-3.9082	2.86988	-1.3618	0.173261	0.914384
KRI1	1.1107	4.68404	3.44738	1.35872	0.174234	0.914555
WDR45	9.07038	2.39396	1.76112	1.35934	0.174037	0.914555
MTND2P28	5.1708	-1.87658	1.38101	-1.35885	0.174194	0.914555
DYNLL2	5.83386	-2.78572	2.04914	-1.35946	0.174001	0.914555
ARHGEF2	5.60341	2.87457	2.11645	1.3582	0.174399	0.914892
PAPSS1	3.09102	3.08917	2.27603	1.35726	0.174697	0.915926
BRIP1	1.20154	4.20171	3.11149	1.35039	0.176892	0.916432
KATNAL1	2.33998	3.7605	2.78033	1.35254	0.176204	0.916432
GDPD5	6.84765	3.23225	2.39103	1.35182	0.176432	0.916432
ARHGEF7	5.34986	2.82548	2.09144	1.35098	0.176702	0.916432
ATAD2B	2.22589	2.72874	2.01547	1.35389	0.17577	0.916432
KIAA1614	2.17849	2.63066	1.94424	1.35305	0.17604	0.916432
AKIP1	2.67104	2.61198	1.93334	1.35102	0.176689	0.916432
TMEM51	5.7067	2.58419	1.90606	1.35578	0.17517	0.916432
TPGS1	7.2535	2.15081	1.59012	1.35261	0.17618	0.916432
GOSR1	7.11621	1.82884	1.34934	1.35536	0.175304	0.916432
HHLA2	4.43919	1.5057	1.11334	1.35241	0.176245	0.916432
C1S	82.9169	-1.36976	1.01453	-1.35014	0.176972	0.916432
HNRNPM	21.8803	-1.746	1.28914	-1.35439	0.175613	0.916432
LITAF	28.9236	-1.83034	1.35511	-1.3507	0.176793	0.916432
BANF1	19.8236	-1.91813	1.41772	-1.35297	0.176065	0.916432
MATR3	30.9694	-2.20563	1.63226	-1.35127	0.176609	0.916432
APOL4	4.90208	-2.6816	1.97849	-1.35538	0.175297	0.916432
USP7	4.25382	-2.69617	1.99516	-1.35136	0.176581	0.916432
NDEL1	1.17625	-3.02589	2.24139	-1.35001	0.177013	0.916432
FLII	5.51513	-3.24632	2.39395	-1.35605	0.175082	0.916432
SEPTIN6	4.38495	-3.37316	2.49573	-1.35157	0.176512	0.916432
DENND4A	1.17802	-4.16957	3.07548	-1.35575	0.17518	0.916432
NRP1	3.35984	4.42721	3.28122	1.34926	0.177254	0.917158
CDC40	4.92236	2.97109	2.20596	1.34685	0.17803	0.918608
CATSPERG	1.18321	2.61455	1.93982	1.34783	0.177713	0.918608
MT-ND4L	16.8897	-1.83841	1.3648	-1.34702	0.177973	0.918608
CAPN15	5.30298	-2.97334	2.20621	-1.34772	0.17775	0.918608
EED	4.59488	-3.66449	2.72085	-1.34682	0.17804	0.918608
PSPN	1.37867	2.94707	2.18944	1.34604	0.178291	0.918968
MAFB	7.49041	2.67012	1.98379	1.34597	0.178312	0.918968
PECR	1.59551	3.37554	2.50861	1.34558	0.178437	0.919091
POU5F1	5.59597	1.85958	1.38246	1.34513	0.178584	0.91933
AIPL1	0.886766	3.42309	2.54607	1.34446	0.178801	0.919924
HDAC8	8.25281	-4.09981	3.05019	-1.34412	0.17891	0.919964
KDM4C	1.73716	5.34291	3.9839	1.34113	0.179879	0.920265
NDUFAF4	1.19373	4.76448	3.5492	1.34241	0.179463	0.920265
H2BC21	1.11116	4.57793	3.41228	1.3416	0.179725	0.920265
OSTF1	1.23428	3.74408	2.78976	1.34208	0.17957	0.920265
PAF1	2.35725	2.98054	2.22338	1.34054	0.180069	0.920265
STK11	1.9406	2.66284	1.98328	1.34265	0.179386	0.920265
ACTE1P	3.13165	2.3781	1.77071	1.34302	0.179264	0.920265
MAP7D1	10.5751	2.09894	1.56579	1.3405	0.180083	0.920265
SUPT6H	7.21932	-2.50857	1.87118	-1.34063	0.18004	0.920265
API5	16.1241	-2.75801	2.05565	-1.34167	0.179702	0.920265
RNASEH1	1.28199	-2.84158	2.11969	-1.34056	0.180064	0.920265
NME6	9.70866	-2.18534	1.63163	-1.33936	0.180455	0.921649
ARL8B	9.73449	2.41394	1.80664	1.33615	0.1815	0.924835
DNAJC10	45.9875	-1.4688	1.09933	-1.33609	0.181521	0.924835
NUCB1	18.8204	-1.97109	1.47616	-1.33529	0.181783	0.924835
CDKL1	1.12395	-2.80387	2.09714	-1.337	0.181223	0.924835
SP110	6.13433	-2.99882	2.24584	-1.33528	0.181785	0.924835
LARP6	2.29452	-3.58738	2.68487	-1.33614	0.181502	0.924835
SEPTIN1	4.26893	-3.67048	2.74888	-1.33526	0.181791	0.924835
SEMA4A	1.33056	4.78479	3.58617	1.33423	0.182127	0.925469
DDX58	7.74776	3.38527	2.54122	1.33215	0.182812	0.925469
ZNF33B	1.58492	2.56026	1.922	1.33208	0.182833	0.925469
ZBTB20	4.08844	2.4624	1.84792	1.33253	0.182687	0.925469
MAP4	17.6096	1.72371	1.29378	1.33231	0.18276	0.925469
EIF3M	17.5108	-2.03024	1.52181	-1.3341	0.182173	0.925469
DDX39A	2.03619	-3.89726	2.92529	-1.33226	0.182774	0.925469
NUDCD1	1.12647	-4.7771	3.58436	-1.33276	0.18261	0.925469
MZF1	1.3427	-5.67609	4.25964	-1.33253	0.182687	0.925469
P3H4	2.81468	2.24926	1.68919	1.33156	0.183004	0.925819
ARPC3	16.38	-1.73015	1.30171	-1.32914	0.183802	0.928824
SLC36A2	1.44391	-2.6296	1.9782	-1.32929	0.183752	0.928824
GTF3A	5.44858	2.45051	1.84662	1.32702	0.1845	0.929516
CARD19	2.95889	2.40841	1.81511	1.32687	0.184553	0.929516
GSDMB	2.43642	-1.85657	1.39768	-1.32832	0.184073	0.929516
SELENOS	10.761	-2.18665	1.6467	-1.3279	0.184211	0.929516
POLR2B	2.5128	-2.46546	1.85807	-1.32689	0.184544	0.929516
MINK1	2.44021	-2.91175	2.19299	-1.32776	0.184259	0.929516
MED18	0.977564	3.03296	2.28804	1.32557	0.184981	0.930284
FAM78A	3.30812	2.74868	2.07414	1.32521	0.1851	0.930284
SLC28A2	6.25583	2.15052	1.6224	1.32552	0.184999	0.930284
LIMD2	11.2037	-1.95034	1.47177	-1.32517	0.185115	0.930284
USP46	1.06031	4.05615	3.06331	1.3241	0.185468	0.931458
KCNN1	1.47394	-3.53864	2.673	-1.32385	0.185553	0.931458
NIPBL	3.10629	3.79274	2.86633	1.3232	0.185768	0.932019
PAK1	7.36304	-2.46196	1.86113	-1.32283	0.185893	0.93213
C12orf29	1.14824	6.14071	4.7143	1.30257	0.192722	0.932252
FAM189A2	2.45071	6.06091	4.6283	1.30953	0.190354	0.932252
PRUNE2	0.962802	6.00149	4.61399	1.30072	0.193356	0.932252
C1GALT1C1	1.07098	4.97129	3.81578	1.30282	0.192635	0.932252
CRTC1	1.612	4.91269	3.75552	1.30812	0.190831	0.932252
RAB11FIP2	1.85702	4.8319	3.69835	1.3065	0.191382	0.932252
RHEX	2.64087	4.44866	3.38842	1.3129	0.189216	0.932252
KCNE3	1.06244	4.36434	3.34516	1.30467	0.192004	0.932252
PCGF3	3.22887	4.31275	3.29647	1.30829	0.190774	0.932252
STAM2	1.08847	4.26827	3.26556	1.30706	0.191194	0.932252
ENG	1.42991	4.15423	3.15854	1.31524	0.188429	0.932252
TDRD7	3.6274	4.12094	3.15855	1.30469	0.191998	0.932252
ARHGAP23	1.61787	4.04214	3.10798	1.30057	0.193406	0.932252
LRRC8A	0.862061	3.94286	3.01327	1.3085	0.190704	0.932252
ICE1	4.49334	3.89834	2.95931	1.31732	0.187733	0.932252
ZNF44	1.14444	3.81185	2.92658	1.30249	0.192748	0.932252
LRRTM4	2.34218	3.70808	2.8392	1.30603	0.191543	0.932252
URI1	4.06042	3.66693	2.80958	1.30515	0.191841	0.932252
SMYD2	12.6061	3.60157	2.73592	1.3164	0.18804	0.932252
KLHL35	1.01046	3.57808	2.7176	1.31663	0.187963	0.932252
PFAS	1.14331	3.43483	2.60396	1.31908	0.187144	0.932252
FN3KRP	3.72659	3.40467	2.57981	1.31974	0.186922	0.932252
ATF7	2.1203	3.36331	2.58342	1.30188	0.192956	0.932252
RSPH10B	1.93036	3.25633	2.50436	1.30027	0.19351	0.932252
KCTD18	1.98714	3.15089	2.3844	1.32146	0.186348	0.932252
CDH7	3.39659	3.10021	2.35093	1.31871	0.187265	0.932252
ATP2C1	17.5623	2.80532	2.14745	1.30635	0.191435	0.932252
EXOSC7	2.95817	2.78642	2.10986	1.32067	0.186613	0.932252
DCTN2	3.059	2.69513	2.0698	1.30213	0.192874	0.932252
DMAC2L	16.4284	2.6811	2.04248	1.31267	0.189295	0.932252
PAIP2	10.1567	2.66808	2.04165	1.30682	0.191273	0.932252
DMAC1	5.54116	2.62321	2.00463	1.30858	0.190678	0.932252
STAU1	10.8732	2.44143	1.85538	1.31586	0.18822	0.932252
AP3S2	1.48033	2.37798	1.81642	1.30916	0.190482	0.932252
JAK3	20.0462	2.33129	1.77872	1.31066	0.189974	0.932252
SCAF11	7.08687	2.30853	1.7575	1.31353	0.189004	0.932252
CCNB1IP1	3.02165	2.23882	1.7154	1.30513	0.19185	0.932252
DSG3	8.85477	2.21107	1.69993	1.30068	0.193368	0.932252
SPATS2L	15.9014	2.16958	1.66697	1.30151	0.193083	0.932252
RBM17	28.2927	2.12559	1.61873	1.31312	0.189144	0.932252
PPFIBP1	9.34391	2.12543	1.61712	1.31433	0.188736	0.932252
ZNF558	4.60979	2.12089	1.63107	1.3003	0.193497	0.932252
RBMS3	3.06195	2.1179	1.62622	1.30235	0.192798	0.932252
PSMG4	20.2703	2.07189	1.57227	1.31777	0.187579	0.932252
TMEM159	2.38794	2.05376	1.55354	1.32199	0.186173	0.932252
RBM22P2	3.38301	2.01082	1.54121	1.3047	0.191994	0.932252
ITGAV	23.3767	1.90489	1.4492	1.31444	0.188699	0.932252
PRELP	10.879	1.82047	1.38065	1.31856	0.187316	0.932252
METTL2B	28.918	1.47001	1.1196	1.31298	0.189189	0.932252
LIMA1	51.5085	1.4426	1.10924	1.30053	0.193418	0.932252
RPL35A	64.8792	-0.928057	0.71106	-1.30517	0.191834	0.932252
PKM	66.2641	-1.19283	0.906185	-1.31632	0.188065	0.932252
ANKRD12	66.9835	-1.56356	1.18812	-1.316	0.188175	0.932252
ATP6V0E1	16.0596	-1.68414	1.27739	-1.31842	0.187361	0.932252
CTNNA1	49.8299	-1.82142	1.39892	-1.30201	0.192912	0.932252
POLR2L	18.0552	-1.83436	1.40107	-1.30926	0.190447	0.932252
SIRT2	5.31539	-1.89534	1.44537	-1.31131	0.189752	0.932252
BTN3A2	11.7796	-1.95122	1.49989	-1.30091	0.19329	0.932252
EMC1	5.64144	-2.1779	1.65883	-1.31291	0.189214	0.932252
BASP1	12.5576	-2.23773	1.70965	-1.30888	0.190575	0.932252
SNU13	10.9018	-2.38491	1.82462	-1.30707	0.191188	0.932252
FCF1	5.98157	-2.61309	1.99284	-1.31124	0.189776	0.932252
IL18BP	2.88339	-2.61852	1.98458	-1.31943	0.187024	0.932252
KCTD3	1.75481	-2.75147	2.08548	-1.31935	0.187054	0.932252
ADSS2	10.306	-2.75833	2.09588	-1.31607	0.188151	0.932252
ERVK3-1	4.38559	-2.85806	2.17487	-1.31413	0.188803	0.932252
C7orf50	1.78361	-2.89676	2.20834	-1.31174	0.189609	0.932252
PDIA4	10.2079	-2.94287	2.23063	-1.3193	0.187068	0.932252
XRN1	2.83456	-3.07051	2.35245	-1.30524	0.191812	0.932252
PCOLCE	9.21043	-3.20798	2.44216	-1.31358	0.188986	0.932252
CWC15	1.19814	-3.51633	2.6605	-1.32168	0.186275	0.932252
CTNNBL1	1.62216	-3.96937	3.02191	-1.31353	0.189004	0.932252
HSCB	1.60467	-4.00368	3.06907	-1.30453	0.192054	0.932252
CMTR2	1.77646	-5.55044	4.25147	-1.30553	0.191712	0.932252
ARID3B	1.57092	2.8632	2.20347	1.2994	0.193805	0.932687
TMEM266	1.19386	2.25732	1.73714	1.29944	0.193791	0.932687
SLC26A8	4.39619	2.06768	1.59214	1.29868	0.194053	0.933044
VTA1	1.47809	-2.68786	2.06983	-1.29859	0.194085	0.933044
SLA	2.05649	2.67974	2.06627	1.2969	0.194666	0.933864
HNRNPA3	153.151	-1.41449	1.09049	-1.29711	0.194593	0.933864
SNX3	24.7341	-1.72733	1.33183	-1.29696	0.194644	0.933864
DIAPH1	14.9113	-2.20204	1.69725	-1.29741	0.194489	0.933864
XPO1	19.3639	1.93758	1.49517	1.29589	0.195013	0.934048
RYR3	1.7989	-3.10354	2.39446	-1.29613	0.194929	0.934048
VANGL1	1.69761	-4.33359	3.34337	-1.29617	0.194916	0.934048
CRYZ	2.7062	4.66177	3.60412	1.29345	0.195854	0.935039
CHN2	1.02512	3.50852	2.71407	1.29272	0.196109	0.935039
UTP20	1.82744	3.28397	2.54408	1.29083	0.196764	0.935039
ZGRF1	1.21669	2.87059	2.21822	1.29409	0.195633	0.935039
TP63	13.3026	2.82436	2.18637	1.2918	0.196426	0.935039
FHL2	25.7573	2.36666	1.83261	1.29141	0.196561	0.935039
AK3	4.87491	1.74339	1.34784	1.29347	0.195848	0.935039
AAK1	104.44	1.6827	1.29945	1.29493	0.195343	0.935039
FTO	50.4303	-1.18796	0.920212	-1.29096	0.196717	0.935039
GEMIN6	8.68938	-1.42957	1.10686	-1.29155	0.196512	0.935039
CSNK1E	18.8276	-1.71317	1.32475	-1.2932	0.195942	0.935039
MTPAP	10.6543	-1.84	1.42522	-1.29103	0.196693	0.935039
EIF4G1	10.156	-2.10855	1.62894	-1.29443	0.195517	0.935039
BIRC7	2.27647	-2.66324	2.06092	-1.29226	0.196269	0.935039
PPP2R3C	2.46775	-4.86985	3.77111	-1.29136	0.19658	0.935039
YIF1A	2.94928	-2.34531	1.81823	-1.28989	0.197089	0.935941
KDSR	24.062	-2.91233	2.25837	-1.28957	0.197199	0.935941
SHISA2	2.68426	-5.00532	3.88193	-1.28939	0.197262	0.935941
LCORL	1.26735	4.9629	3.85822	1.28632	0.198332	0.936853
CHTF8	1.87378	3.85183	2.99485	1.28615	0.19839	0.936853
MAST3	1.55159	3.72881	2.89976	1.2859	0.198477	0.936853
NAGLU	0.955418	3.71934	2.89311	1.28558	0.198589	0.936853
STX4	6.76339	2.86933	2.2311	1.28606	0.198422	0.936853
MED28	10.2567	1.45232	1.12913	1.28623	0.198365	0.936853
MT-ND6	259.16	-0.73813	0.573902	-1.28616	0.198387	0.936853
ACSL3	30.1354	-2.27673	1.77067	-1.2858	0.198513	0.936853
TNFAIP8	6.37078	-2.59007	2.01086	-1.28804	0.197731	0.936853
MICOS13	3.54713	-2.78467	2.16561	-1.28586	0.198492	0.936853
TNFSF13	4.57265	-3.71851	2.88982	-1.28676	0.198178	0.936853
NYAP2	1.20583	3.42759	2.66841	1.28451	0.198965	0.937301
MZT2B	4.32534	1.87938	1.46354	1.28413	0.199096	0.937301
CSPG4P12	6.93433	-2.22556	1.73226	-1.28477	0.198873	0.937301
UBE2S	1.20771	-3.4158	2.65968	-1.28429	0.19904	0.937301
LCK	3.63603	3.56261	2.77697	1.28291	0.199523	0.938286
ZSCAN12	2.98091	-2.75369	2.14657	-1.28283	0.199552	0.938286
XPNPEP1	7.31131	-2.78738	2.17314	-1.28265	0.199616	0.938286
AGFG2	0.904512	5.64457	4.40872	1.28032	0.200433	0.938878
RPL13AP5	1.01028	5.03163	3.93506	1.27867	0.201015	0.938878
CTTNBP2NL	0.867113	4.50974	3.52574	1.27909	0.200865	0.938878
TNFSF14	1.35436	3.7756	2.94794	1.28076	0.200278	0.938878
CD209	1.17548	3.62678	2.83715	1.27832	0.201138	0.938878
FAM178B	0.909197	3.37671	2.63616	1.28092	0.200223	0.938878
KDM4B	1.35607	3.20954	2.50811	1.27966	0.200663	0.938878
GNAQ	14.931	2.10756	1.64657	1.27997	0.200555	0.938878
QPCTL	9.39959	2.00135	1.56503	1.27879	0.20097	0.938878
AP1M1	104.002	-1.64955	1.29055	-1.27817	0.201188	0.938878
UBTF	3.01866	-2.42305	1.89247	-1.28036	0.200418	0.938878
DIDO1	9.45408	-2.7061	2.11496	-1.27951	0.200718	0.938878
CYP2E1	2.43741	-4.09286	3.19479	-1.2811	0.200158	0.938878
PBK	2.35843	-4.79436	3.74523	-1.28012	0.200502	0.938878
UGP2	11.6152	-2.58838	2.02572	-1.27776	0.201334	0.939077
NPIPB12	7.54811	-3.11787	2.44082	-1.27738	0.201467	0.939213
RNASEH2A	2.00205	-2.52669	1.97943	-1.27647	0.201789	0.940233
PGD	3.03507	3.037	2.38167	1.27516	0.202253	0.941355
TPH1	4.97537	1.12797	0.884473	1.2753	0.202203	0.941355
PTGES3	21.9841	-1.611	1.26367	-1.27486	0.202359	0.941355
BTAF1	8.81434	-2.68073	2.10346	-1.27444	0.202508	0.941355
SULT1A3	4.6763	-3.12196	2.44989	-1.27433	0.202548	0.941355
H2BC5	1.77591	6.64577	5.21935	1.27329	0.202914	0.941487
TECPR2	1.1591	4.8357	3.80382	1.27128	0.20363	0.941487
ODAPH	1.47772	3.77582	2.97067	1.27104	0.203716	0.941487
PCNX3	1.62053	3.56275	2.80052	1.27217	0.203311	0.941487
C17orf58	4.91974	3.45943	2.72165	1.27108	0.2037	0.941487
EGR1	14.7228	2.40809	1.89352	1.27175	0.203461	0.941487
NFIC	22.3527	1.43663	1.12918	1.27227	0.203277	0.941487
KCNJ6	5.47008	-1.62079	1.27452	-1.27168	0.203486	0.941487
CDK13	13.5658	-1.81242	1.42425	-1.27254	0.203181	0.941487
KCNAB2	21.8306	-1.97714	1.55273	-1.27333	0.202901	0.941487
YARS1	6.32125	-2.17034	1.70536	-1.27266	0.20314	0.941487
EPAS1	2.4321	3.54558	2.7906	1.27055	0.20389	0.941695
PIPSL	5.04485	-1.43041	1.12674	-1.26951	0.20426	0.941695
KANSL3	4.91235	-2.01921	1.5899	-1.27003	0.204076	0.941695
PACSIN2	9.81271	-2.58298	2.03472	-1.26945	0.204279	0.941695
HAUS6	1.651	-5.24687	4.13148	-1.26997	0.204094	0.941695
DSN1	1.40712	5.7797	4.5563	1.26851	0.204617	0.941818
DZIP3	1.26156	4.11113	3.23989	1.26891	0.204473	0.941818
AKR7A2	4.0454	-3.71454	2.92761	-1.2688	0.204514	0.941818
SLC12A6	2.9709	2.27993	1.80041	1.26634	0.205391	0.943468
C11orf58	43.4887	1.32726	1.04774	1.26678	0.205232	0.943468
NASP	38.7199	-2.04556	1.61532	-1.26635	0.205389	0.943468
HERPUD1	22.145	-2.14101	1.69028	-1.26666	0.205278	0.943468
CCDC146	2.4734	5.16814	4.11097	1.25716	0.208696	0.943633
TMEM265	0.906275	5.03148	3.99995	1.25789	0.208433	0.943633
ABHD10	1.49104	4.81047	3.84155	1.25222	0.21049	0.943633
DDX24	1.07061	4.75593	3.76936	1.26173	0.207044	0.943633
RRP8	1.43239	4.62048	3.67525	1.25719	0.208685	0.943633
GBE1	1.61632	4.59606	3.68391	1.2476	0.212177	0.943633
SLC25A24	1.50444	4.02578	3.21869	1.25075	0.211024	0.943633
GAS1	1.25135	3.93521	3.11161	1.26469	0.205983	0.943633
TMOD2	2.49142	3.71994	2.98094	1.24791	0.212064	0.943633
HAUS1	1.09612	3.54089	2.81726	1.25685	0.208806	0.943633
AQR	2.64169	3.42389	2.71387	1.26163	0.207084	0.943633
TFIP11	2.34174	3.36653	2.67205	1.25991	0.207703	0.943633
DCTN3	5.36892	3.23687	2.56801	1.26046	0.207503	0.943633
MORN1	0.900596	3.18642	2.54711	1.251	0.210936	0.943633
PSMC3	1.49773	3.10686	2.46512	1.26033	0.207552	0.943633
CHM	2.73305	3.10036	2.47379	1.25328	0.210102	0.943633
CELSR2	8.8051	3.03548	2.42123	1.2537	0.209953	0.943633
KRT8	1.51635	2.99292	2.39763	1.24828	0.211928	0.943633
SPTLC3	2.64302	2.95852	2.35562	1.25594	0.209137	0.943633
PLA2G6	5.84938	2.8371	2.24573	1.26333	0.206469	0.943633
[truncated: 17,586 more rows]
